# Supplementary material for: Defunctionalizing Intracellular Organelles with Genetically-Encoded Molecular Tools Based on Engineered Phospholipase A/Acyltransferases (PLAATs)
Source: bioRxiv or medRxiv preprint supplement (doi:10.1101/2021.10.10.463806), 2021-10-10

# Supplementary Figure 1

**a**

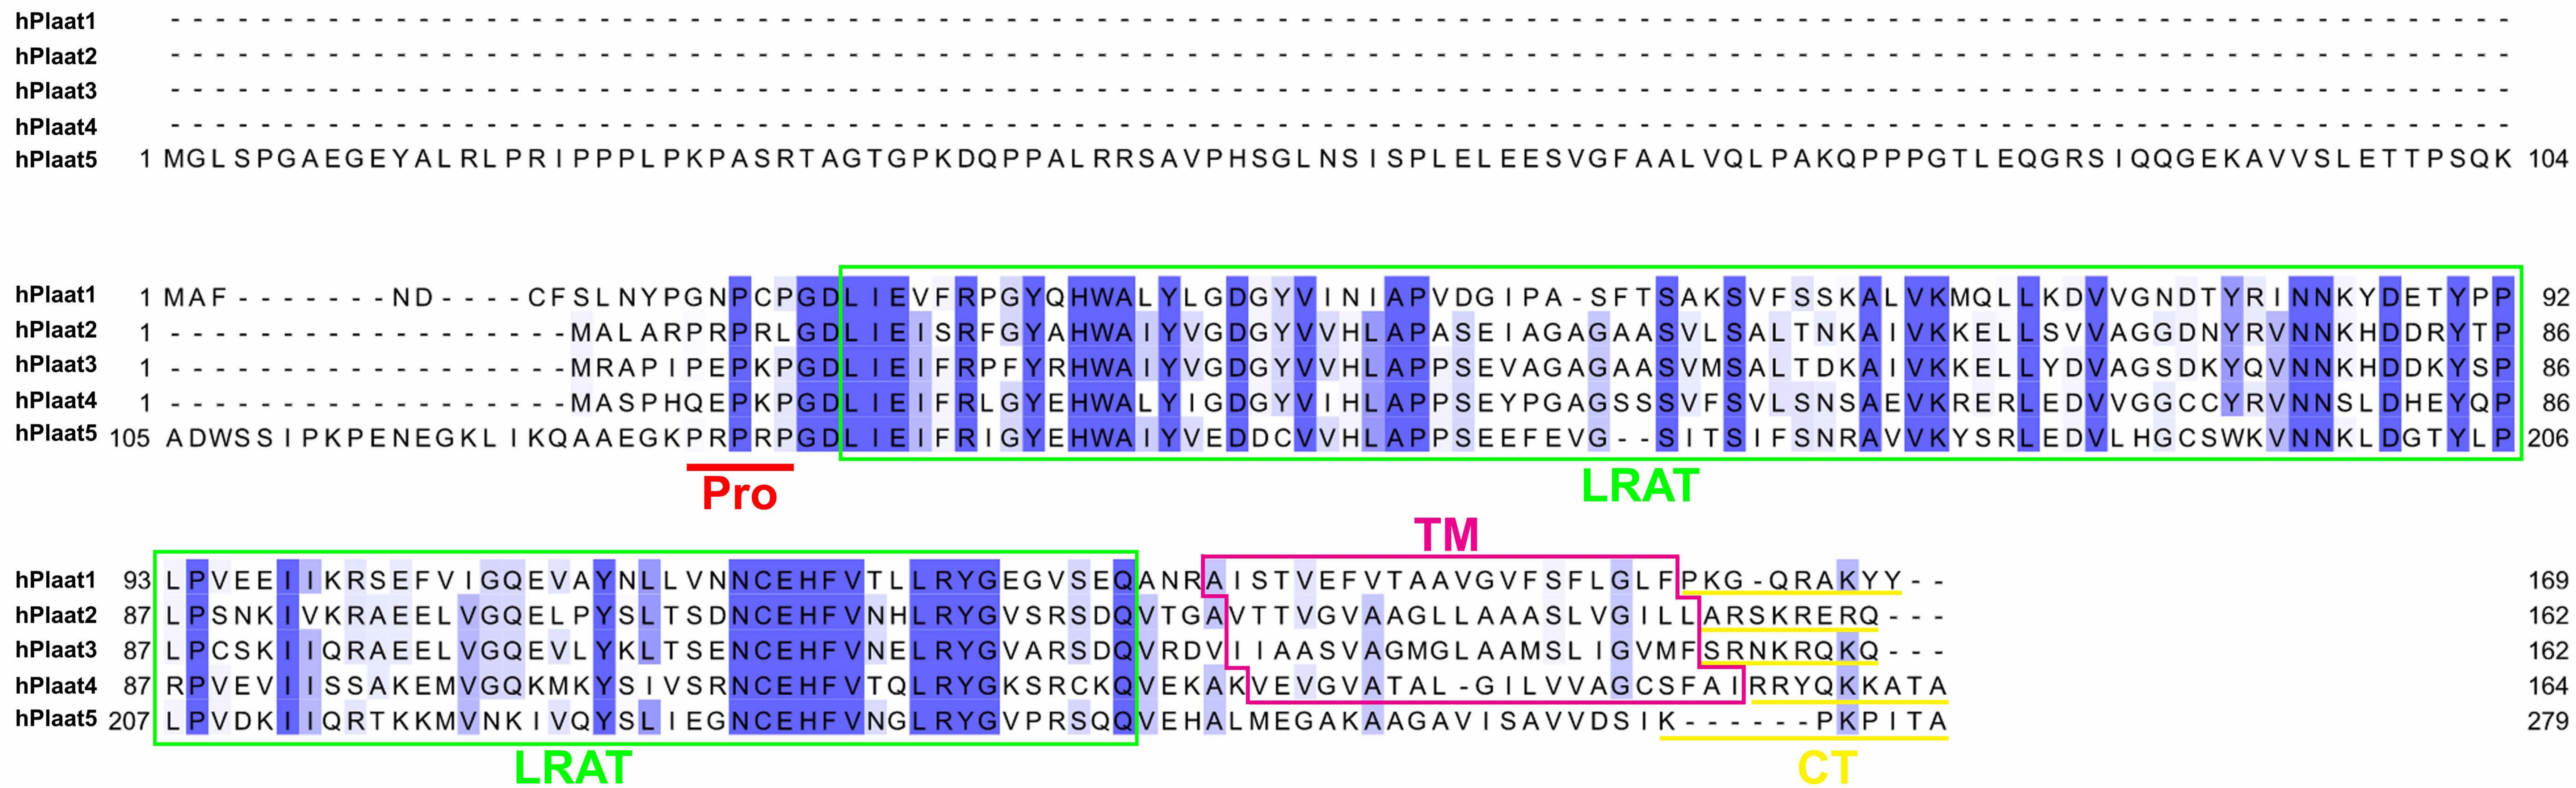

**b**

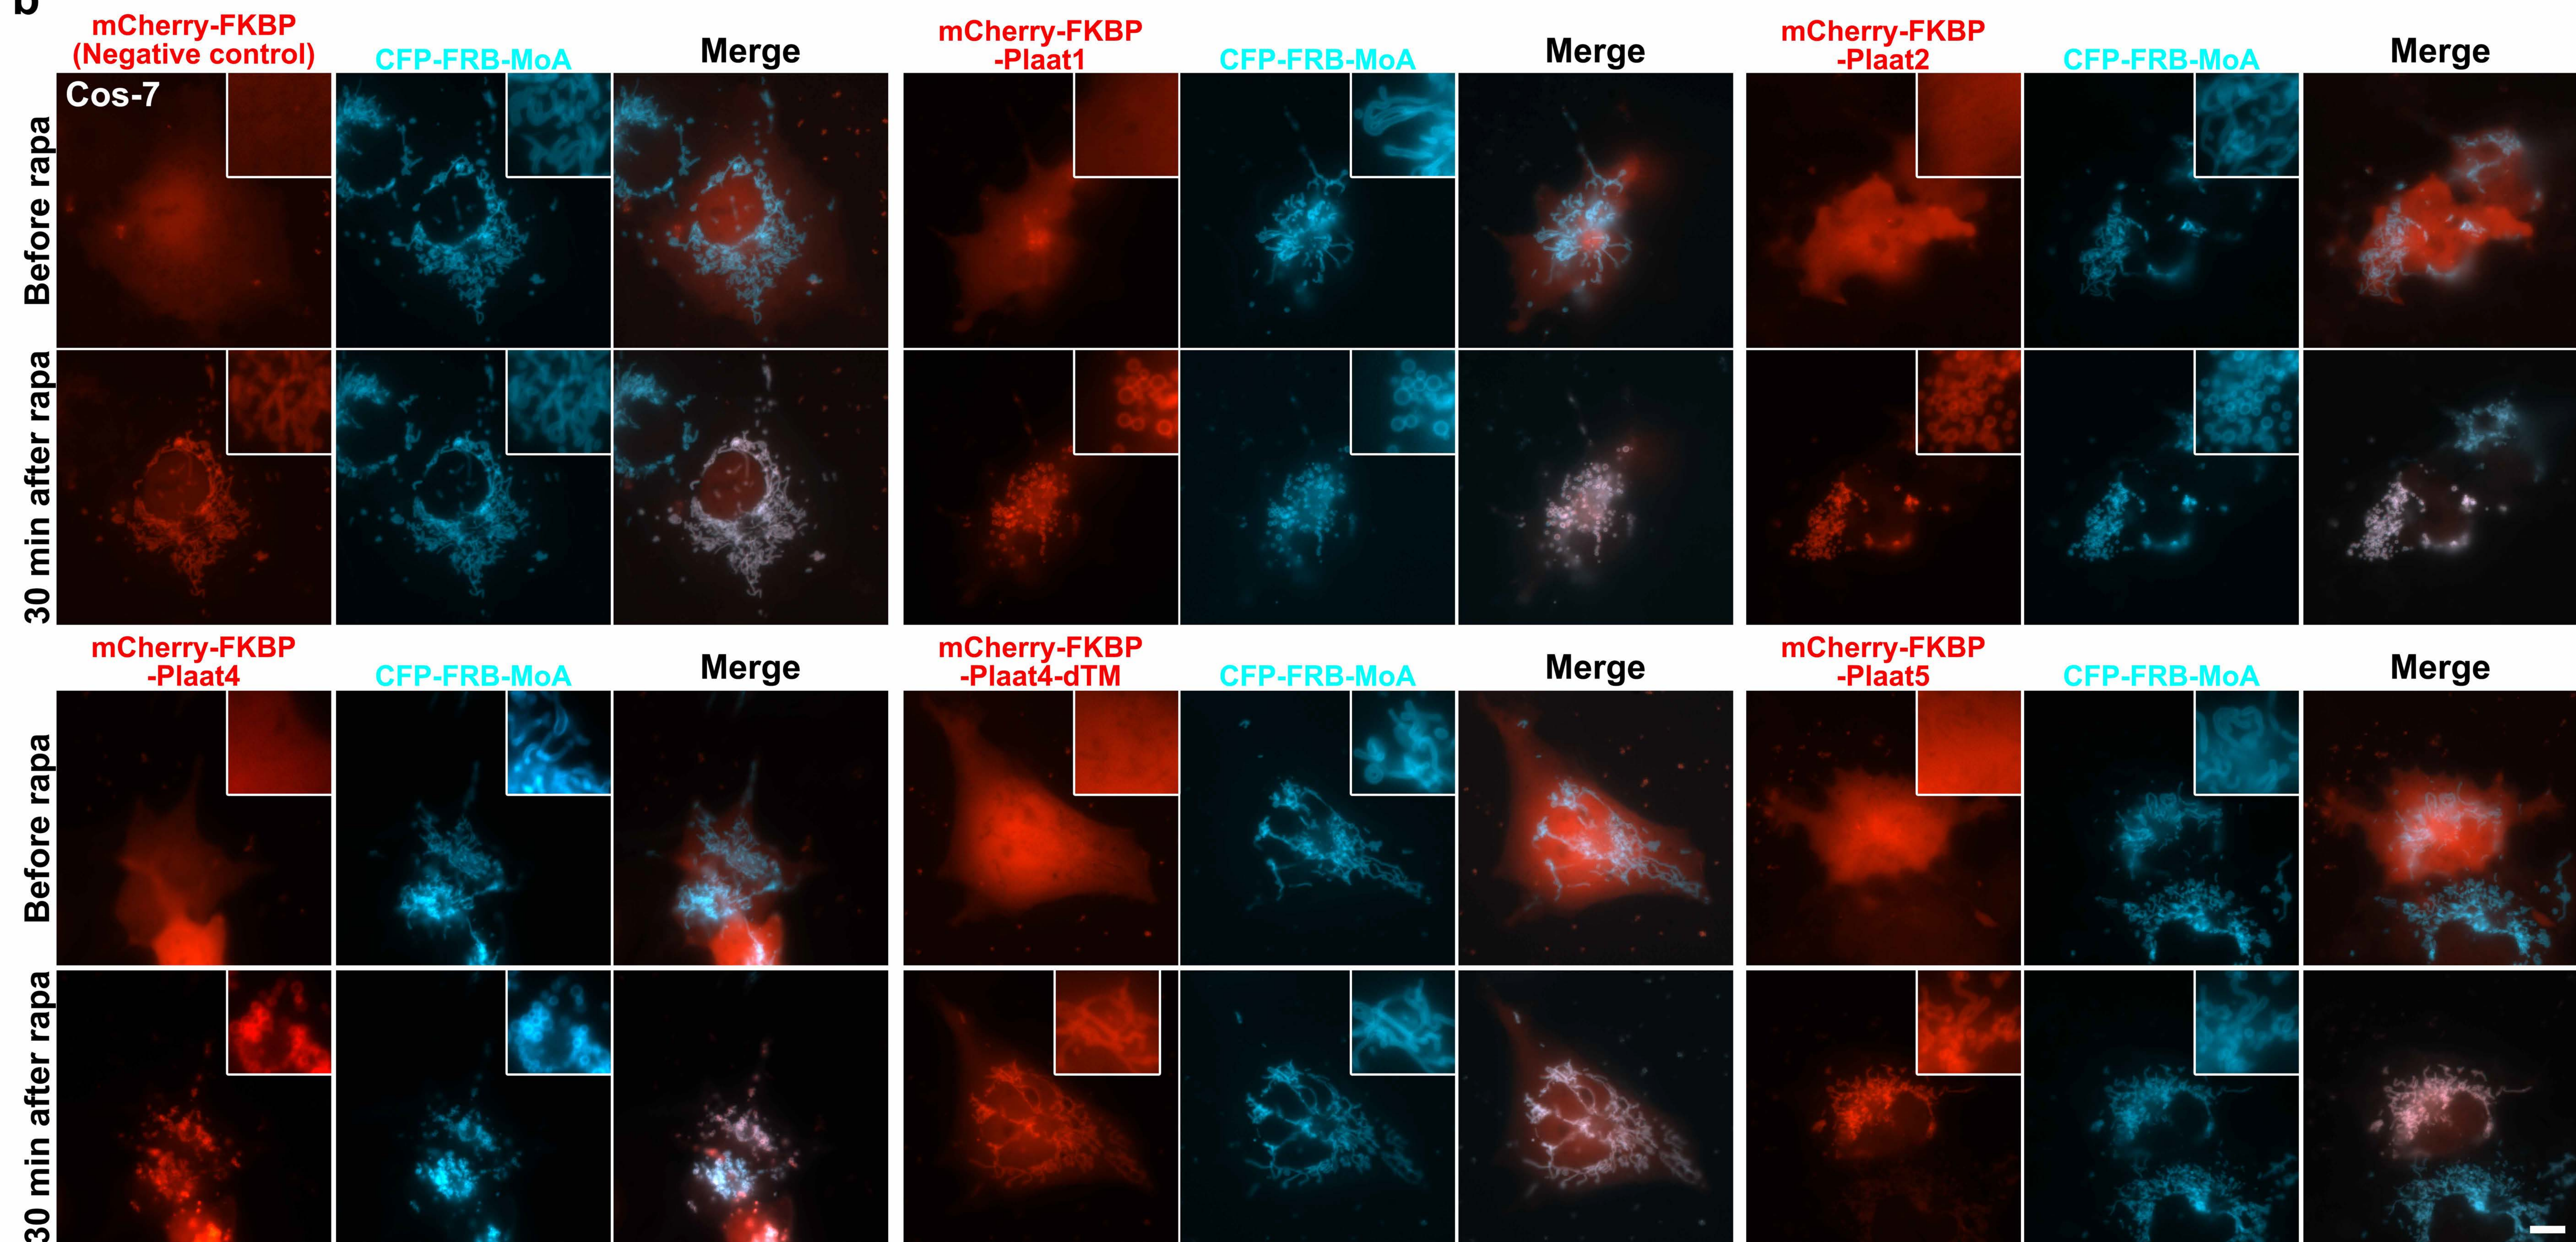

# Supplementary Figure 2

PLAAT3-FL-FKBP-YFP Tom20-CFP-FRB

Enlarged images

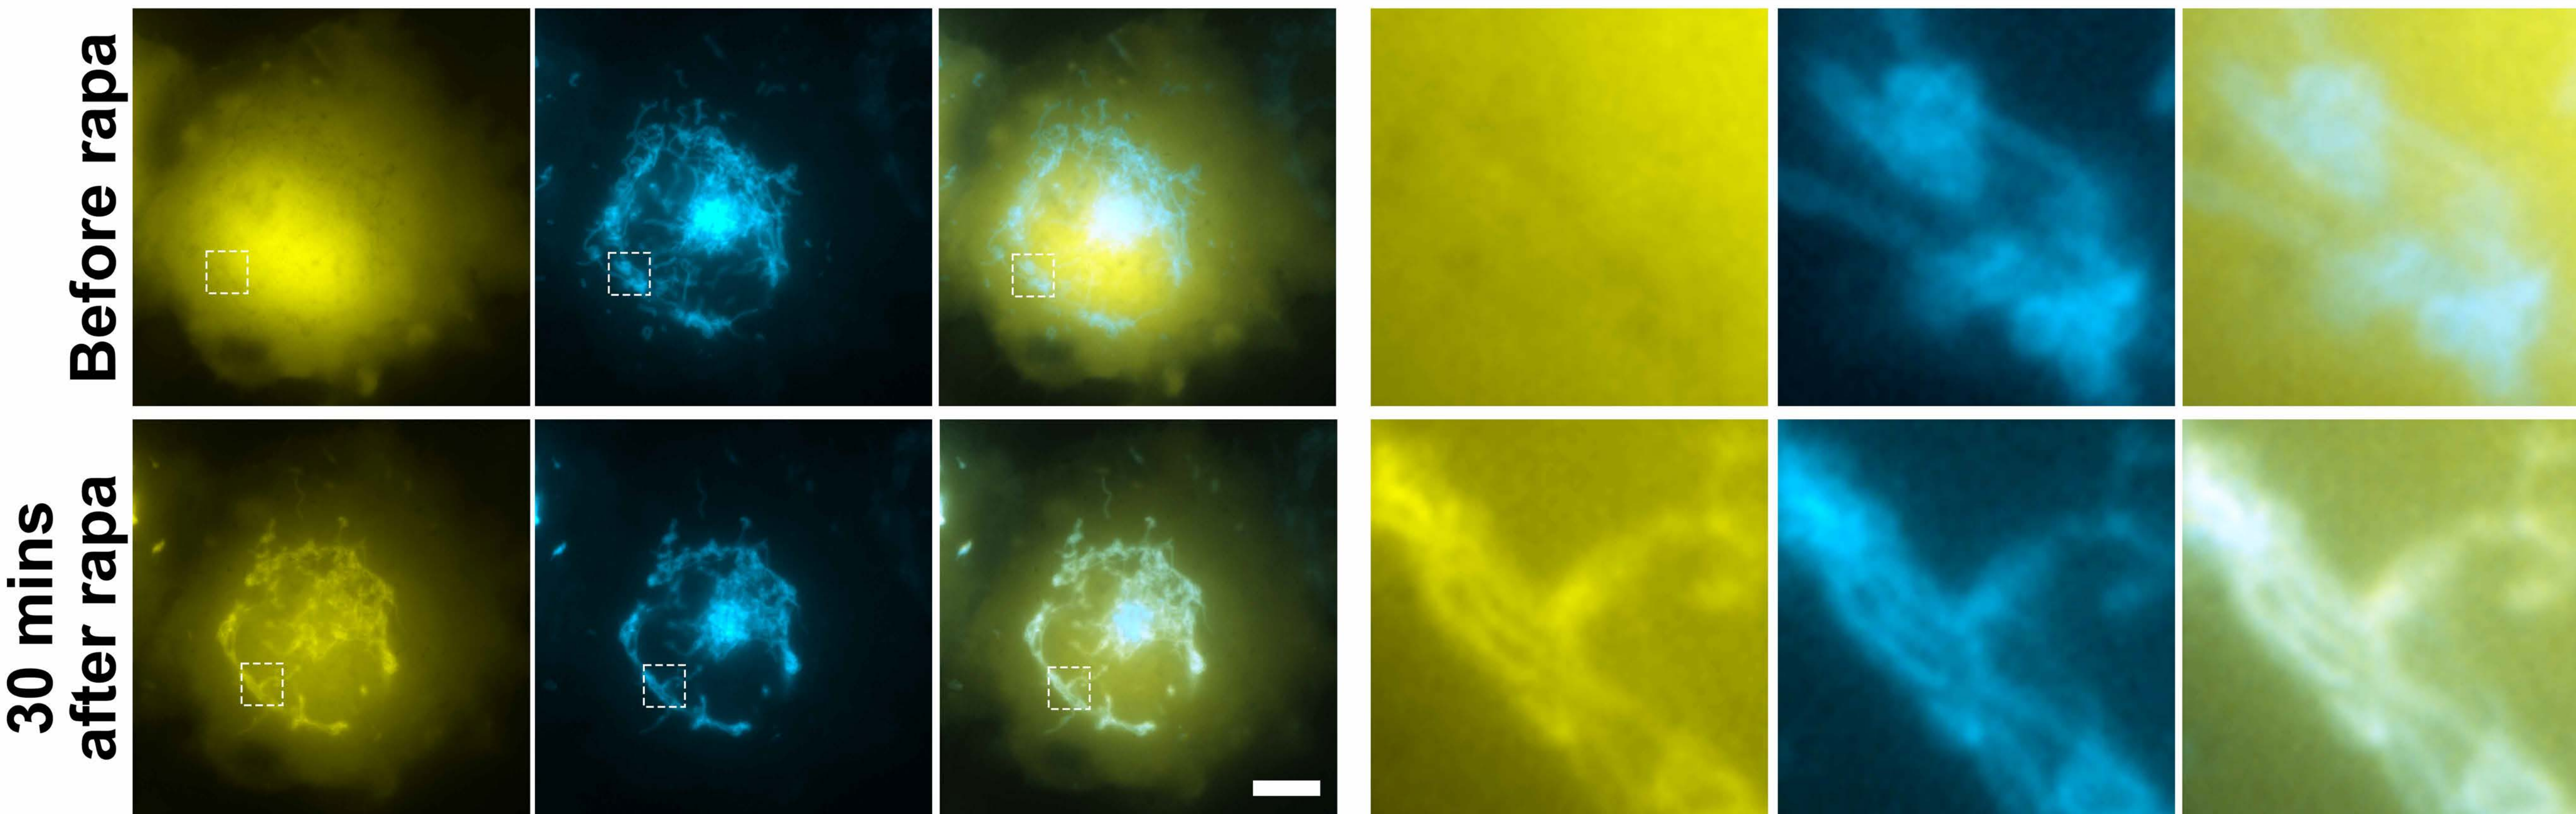

# Supplementary Figure 3

**a**

## Pex3-YFP (Peroxisome)

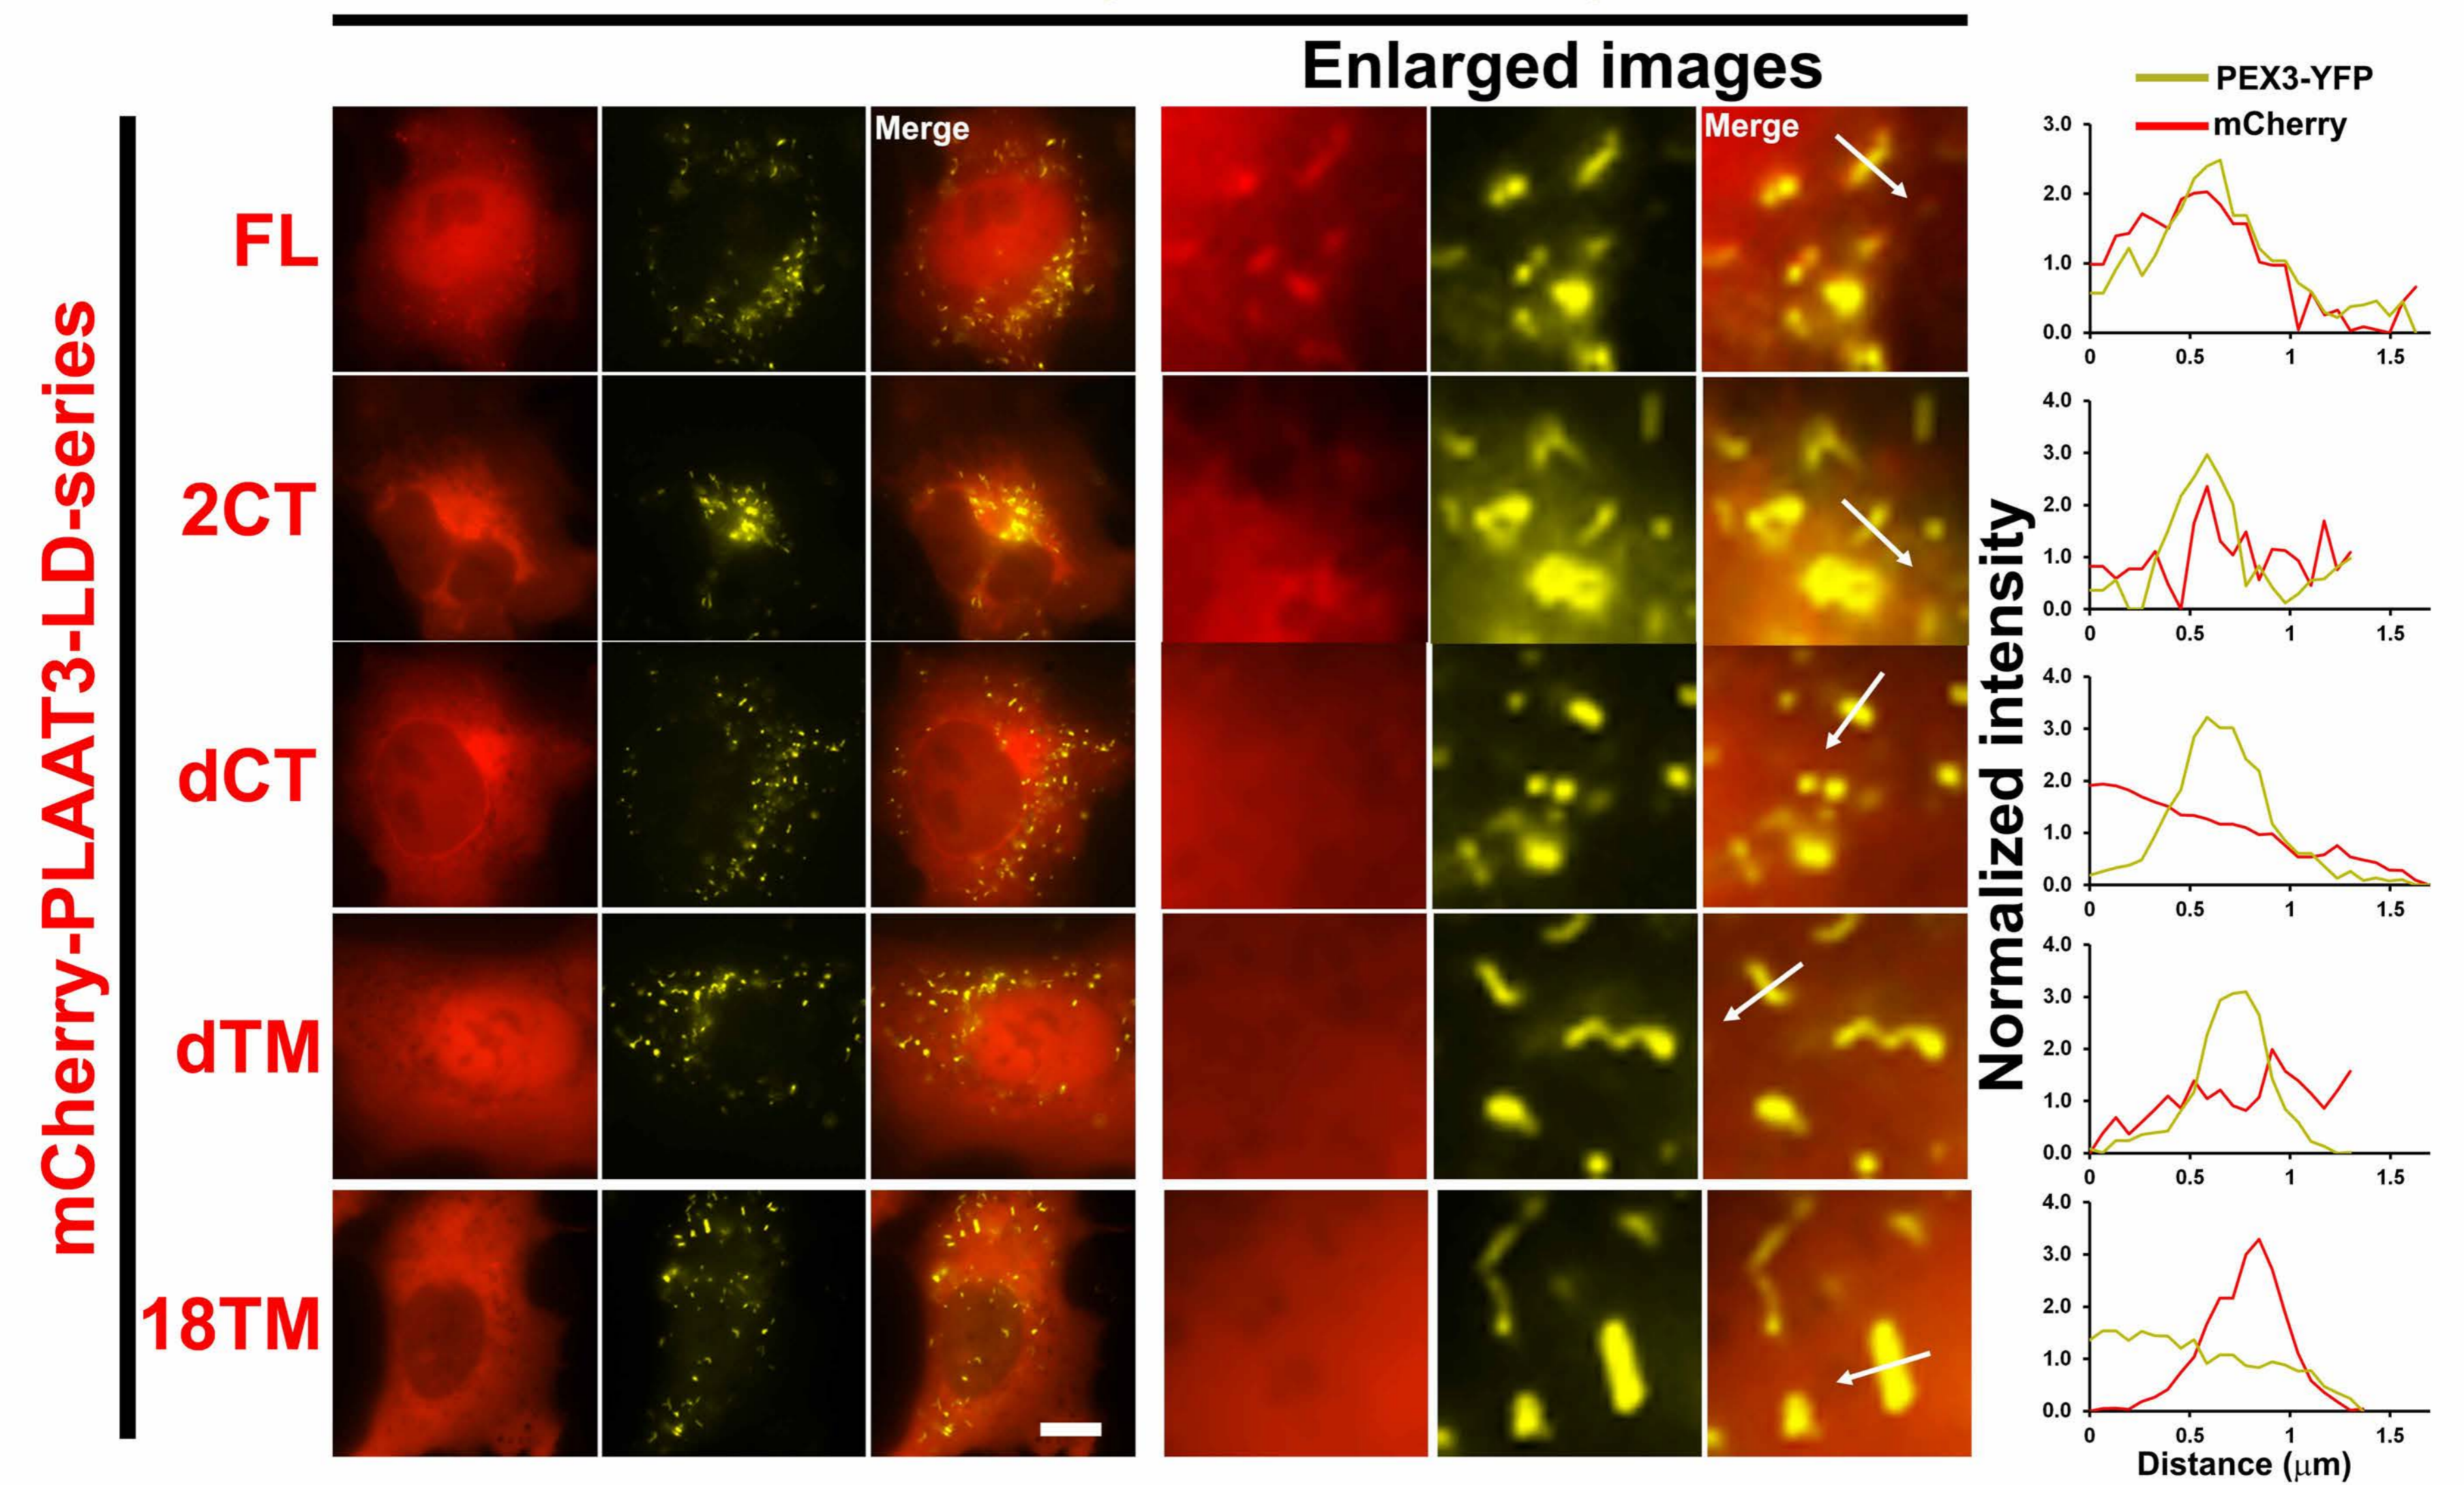

**b**

## CFP-MoA (Mitochondria)

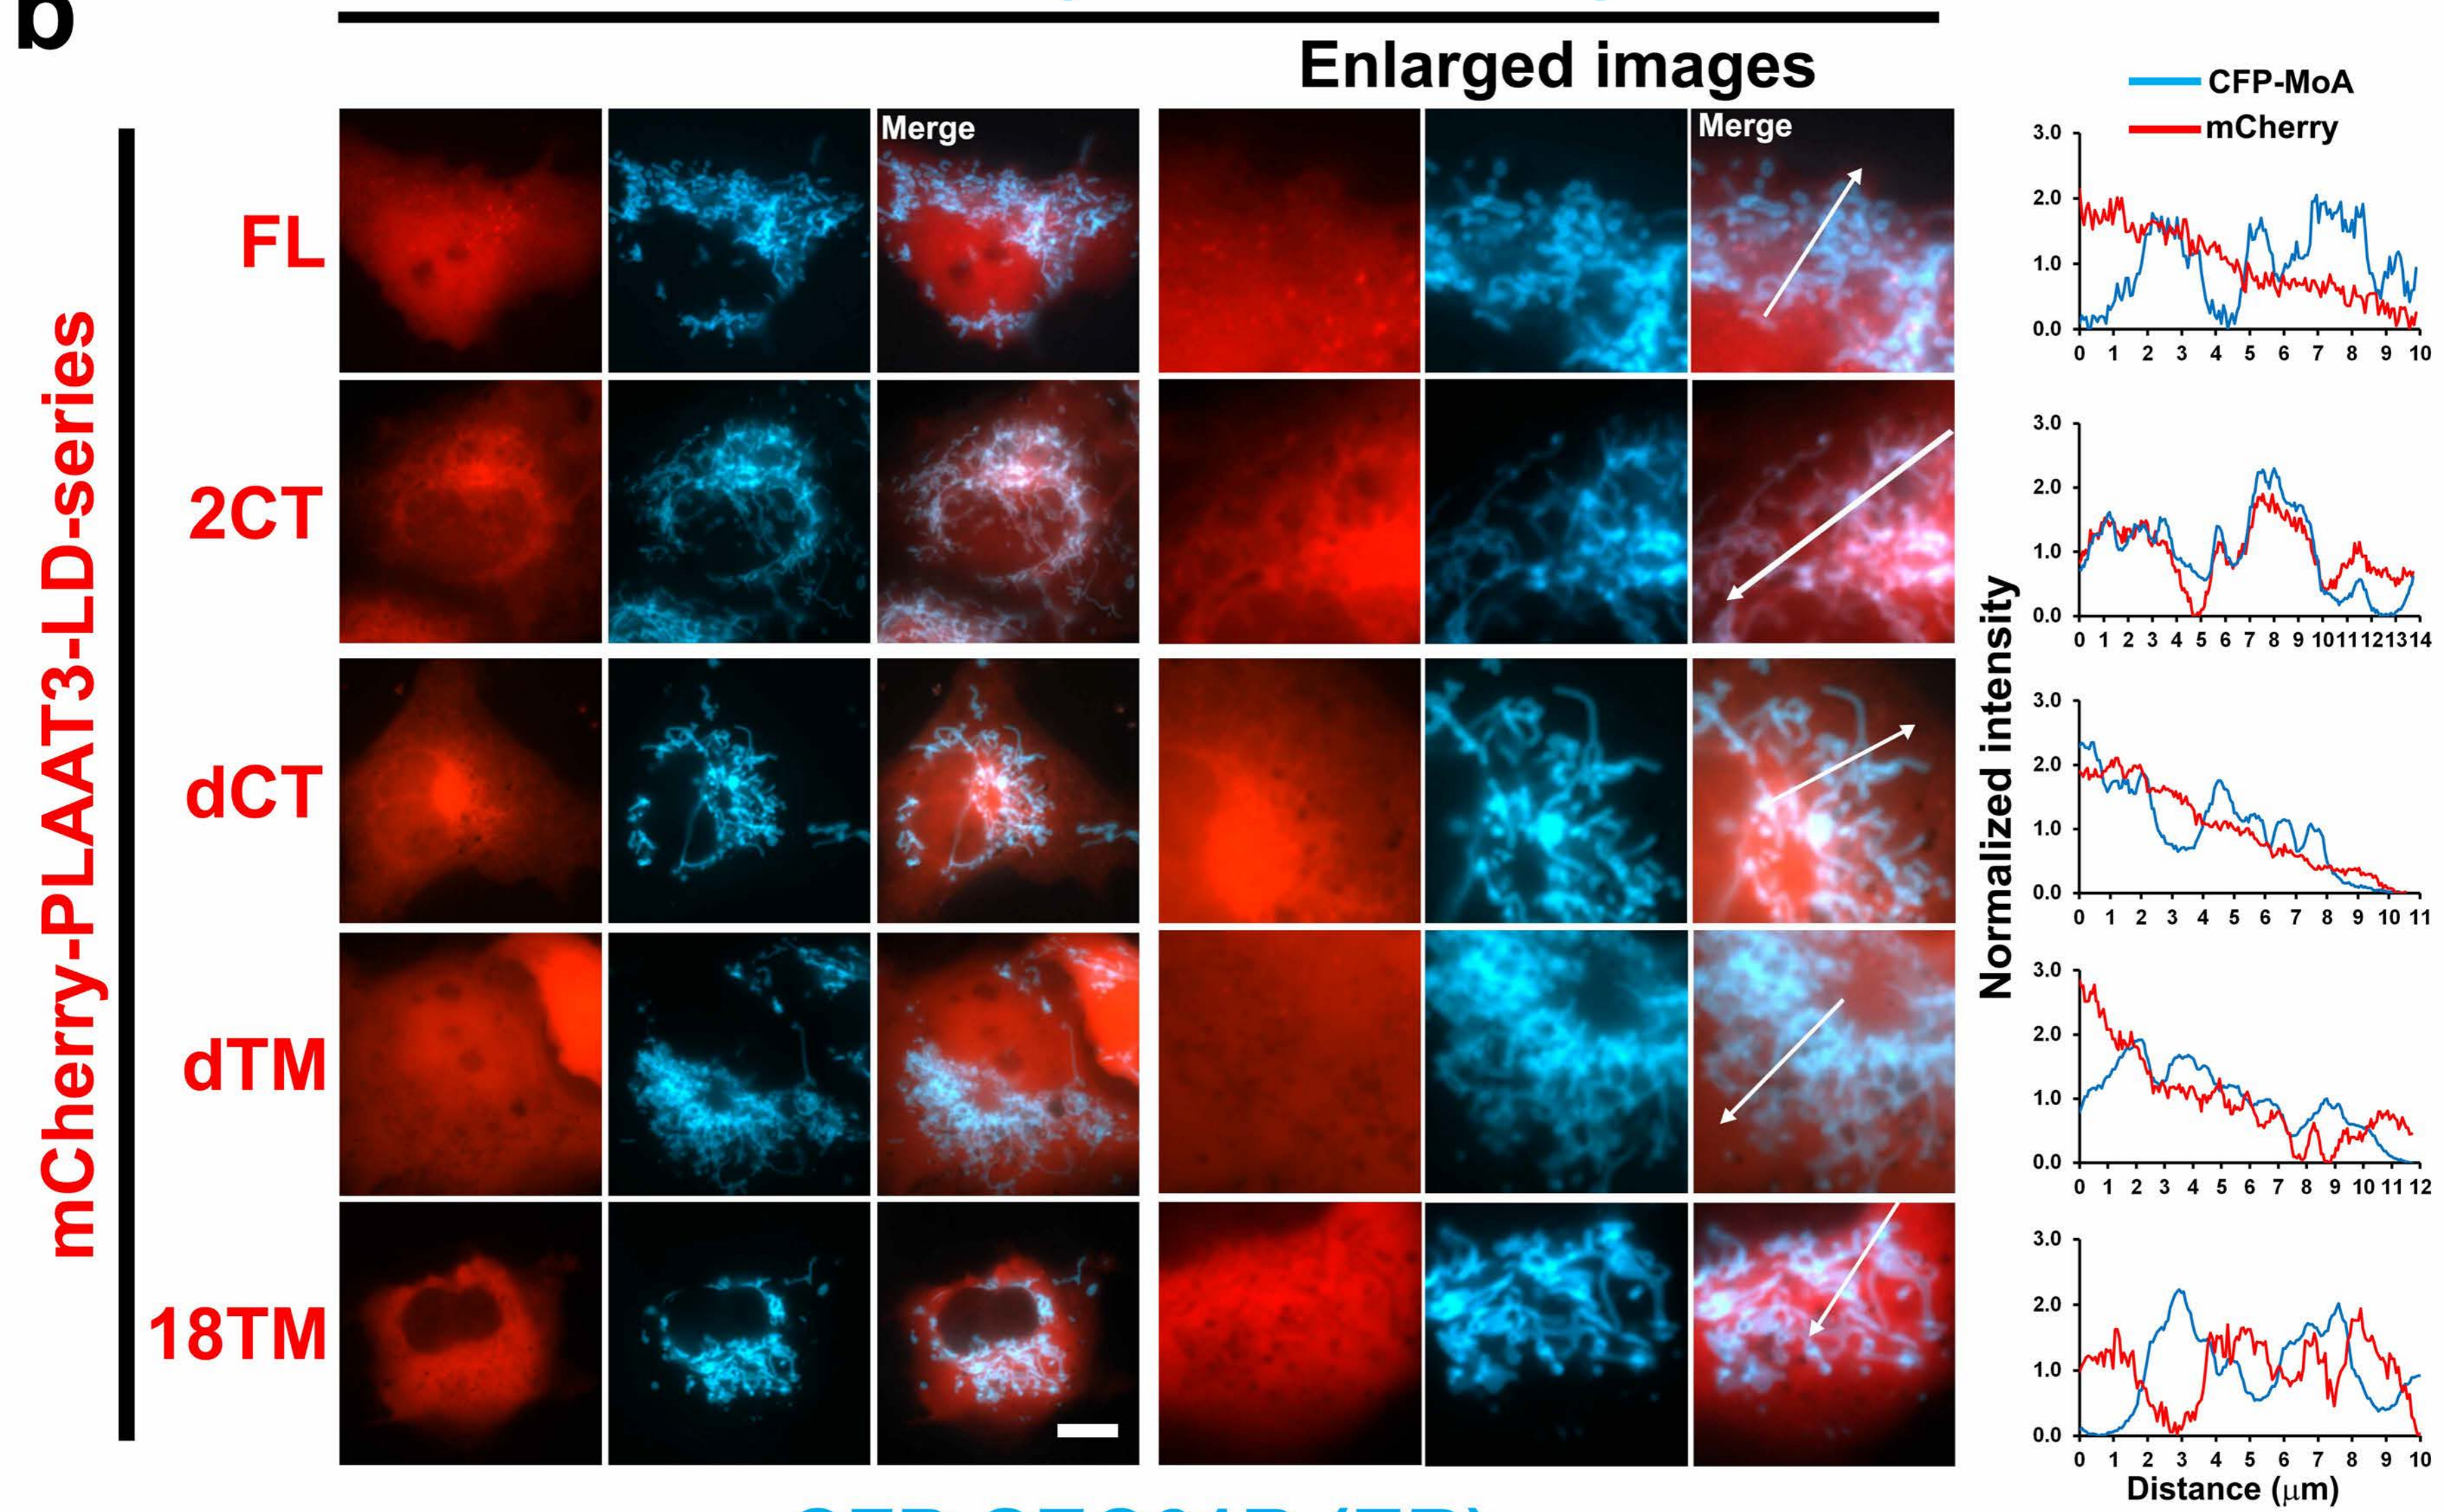

**c**

## CFP-SEC61B (ER)

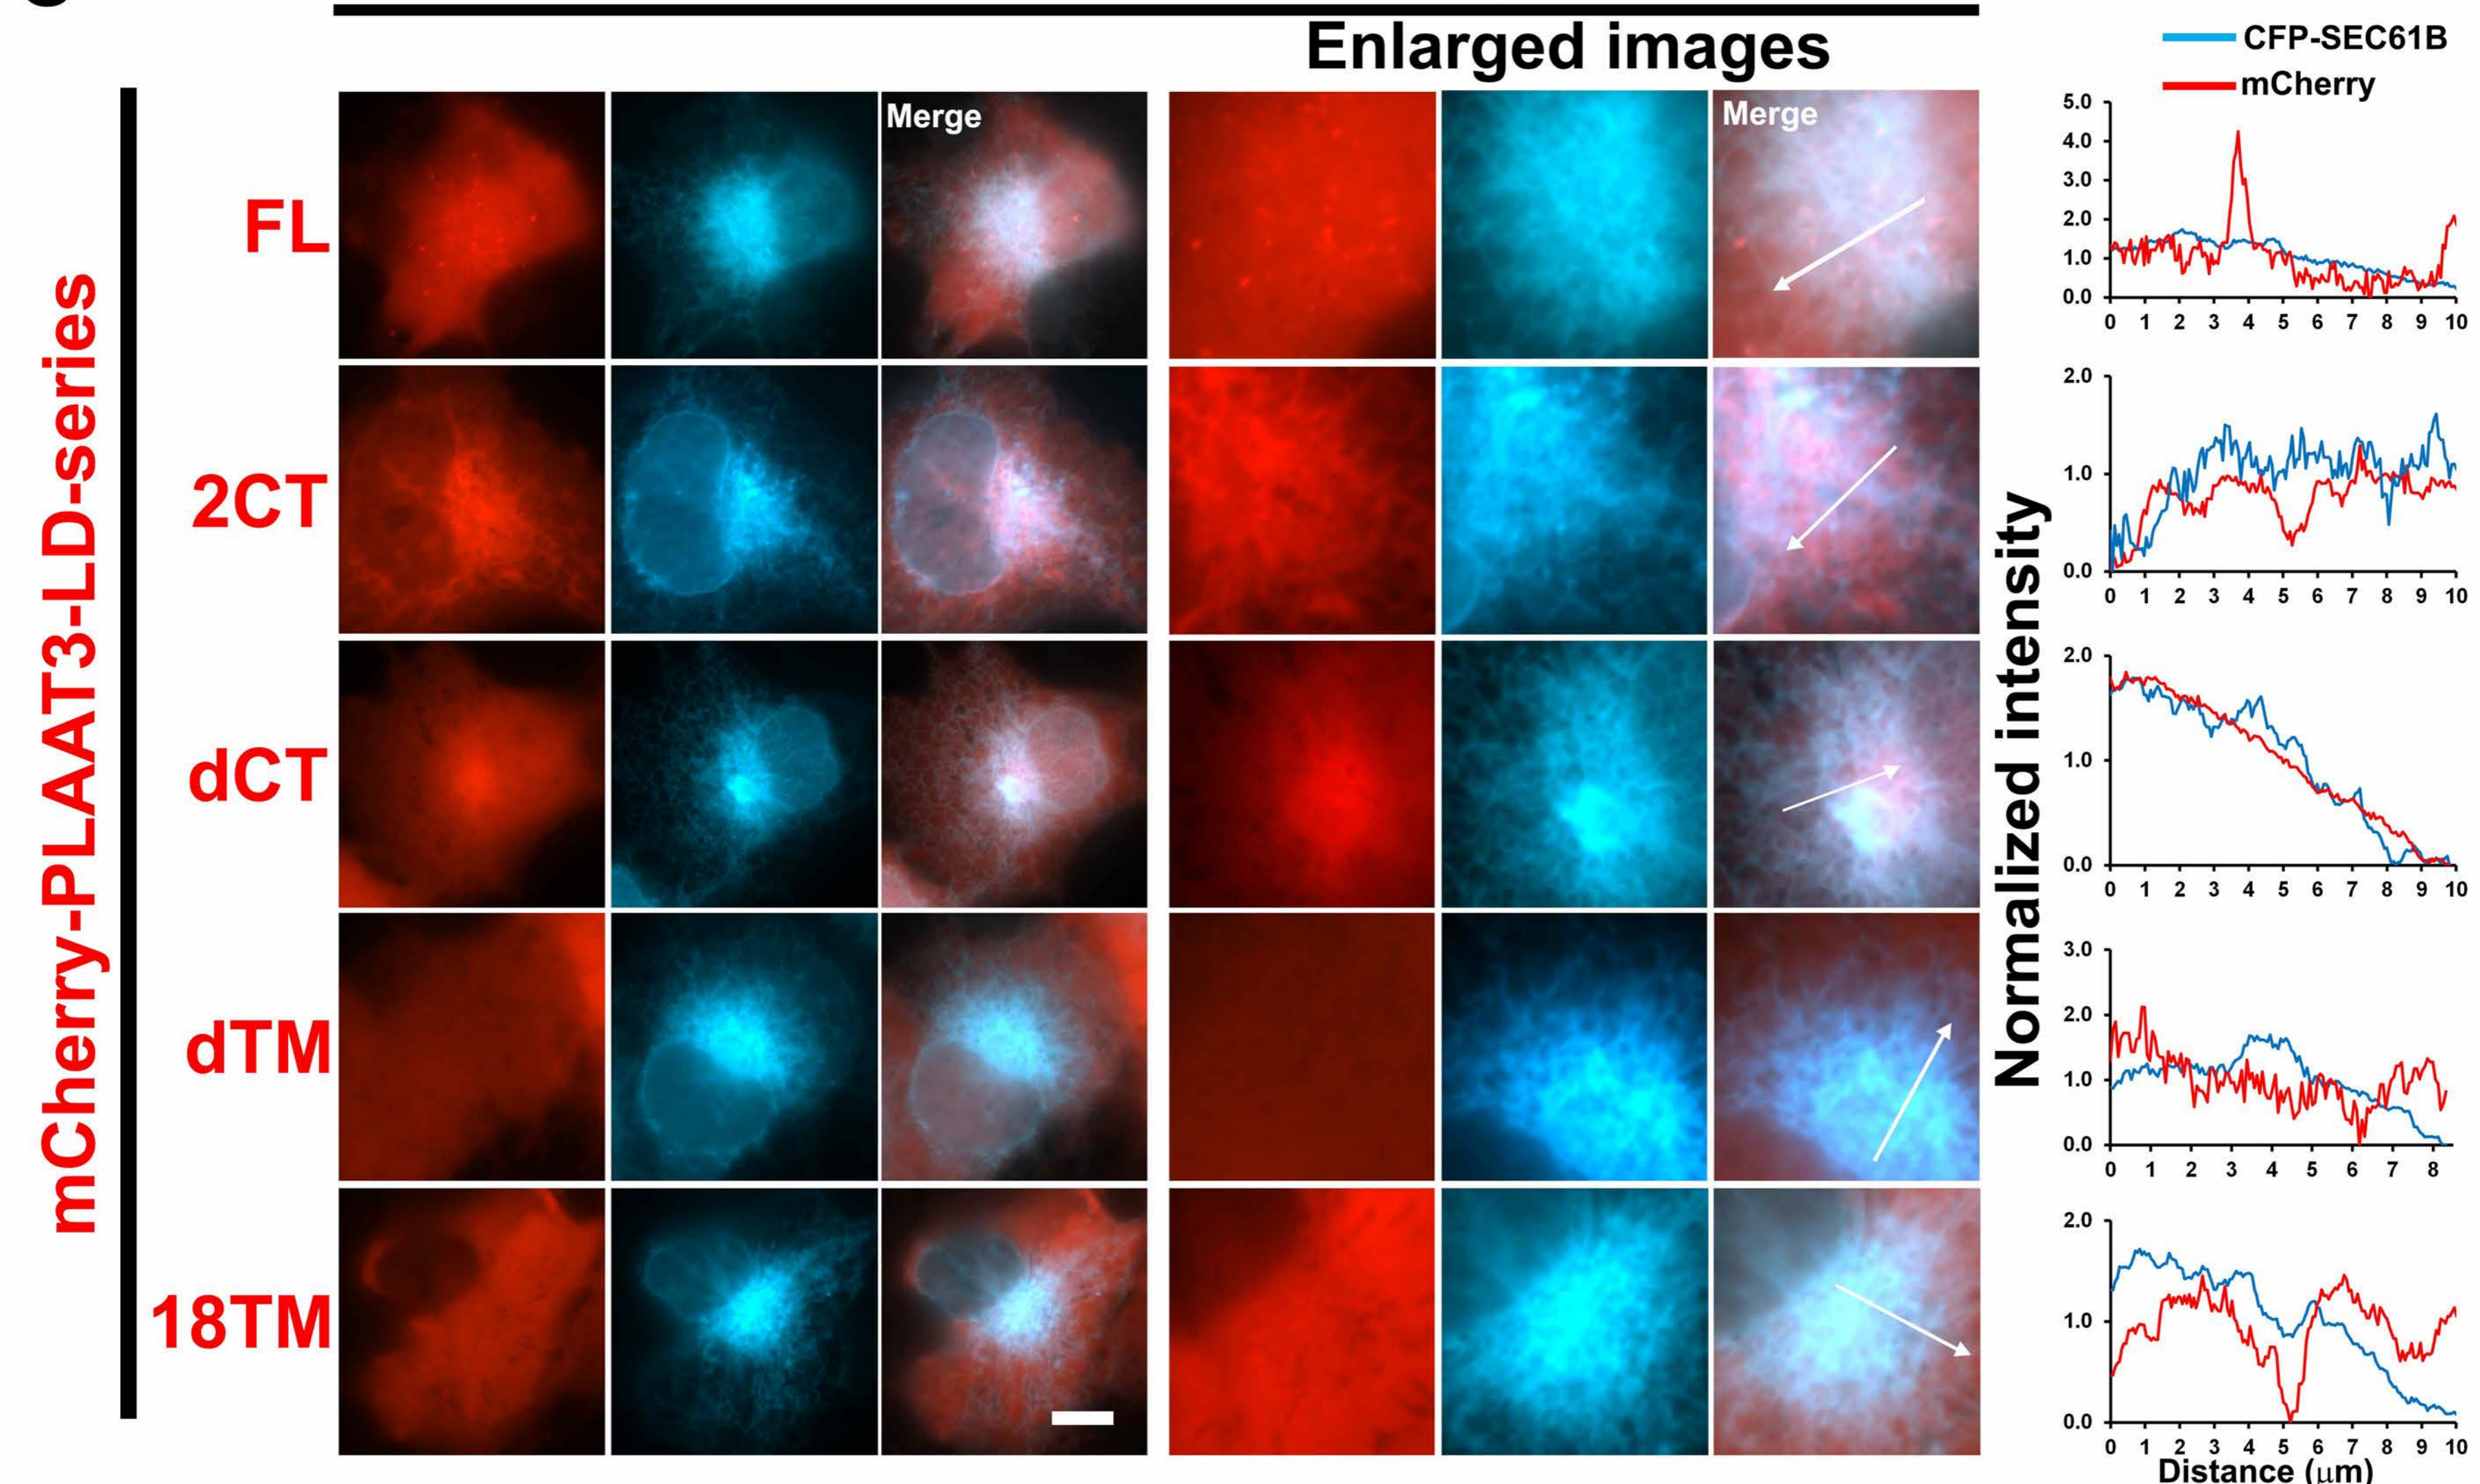

# Supplementary Figure 4

## YFP-FKBP-20TM

### Enlarged images

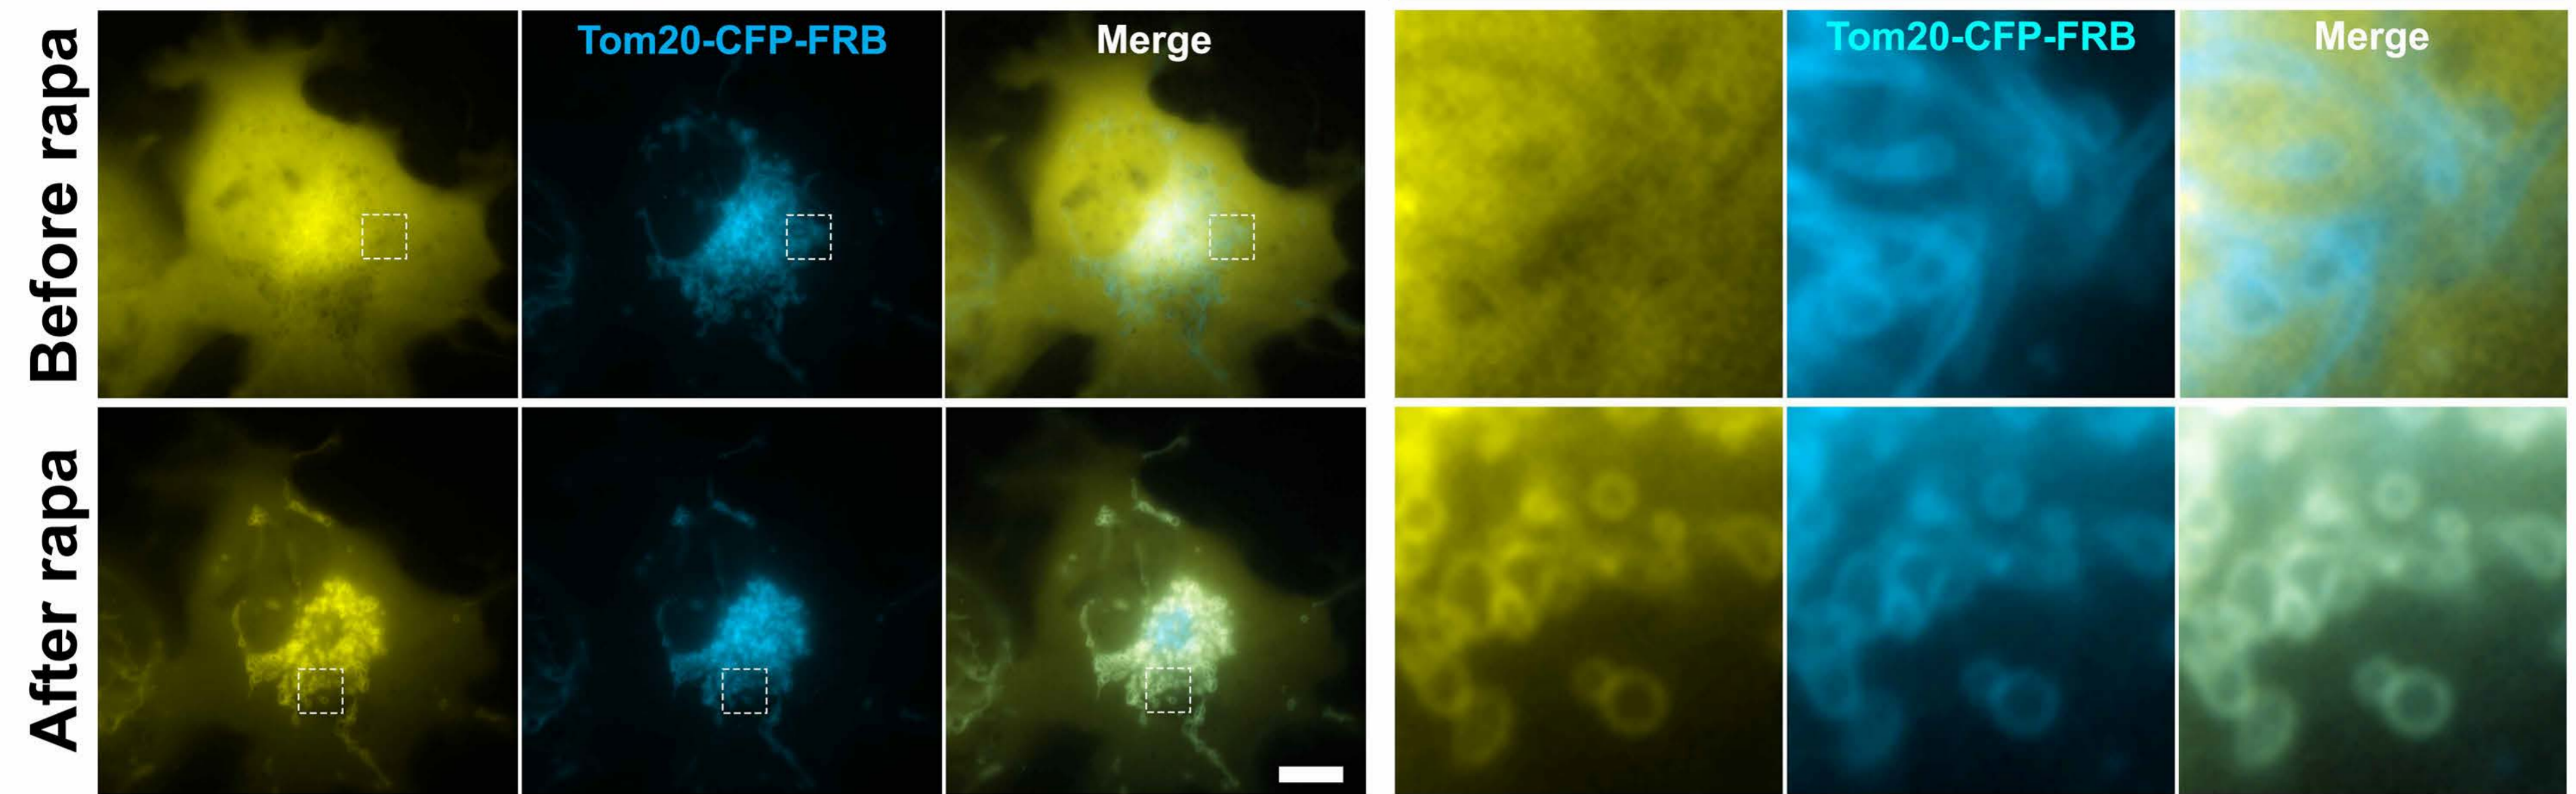

## mCherry-FKBP-19TM

### Enlarged images

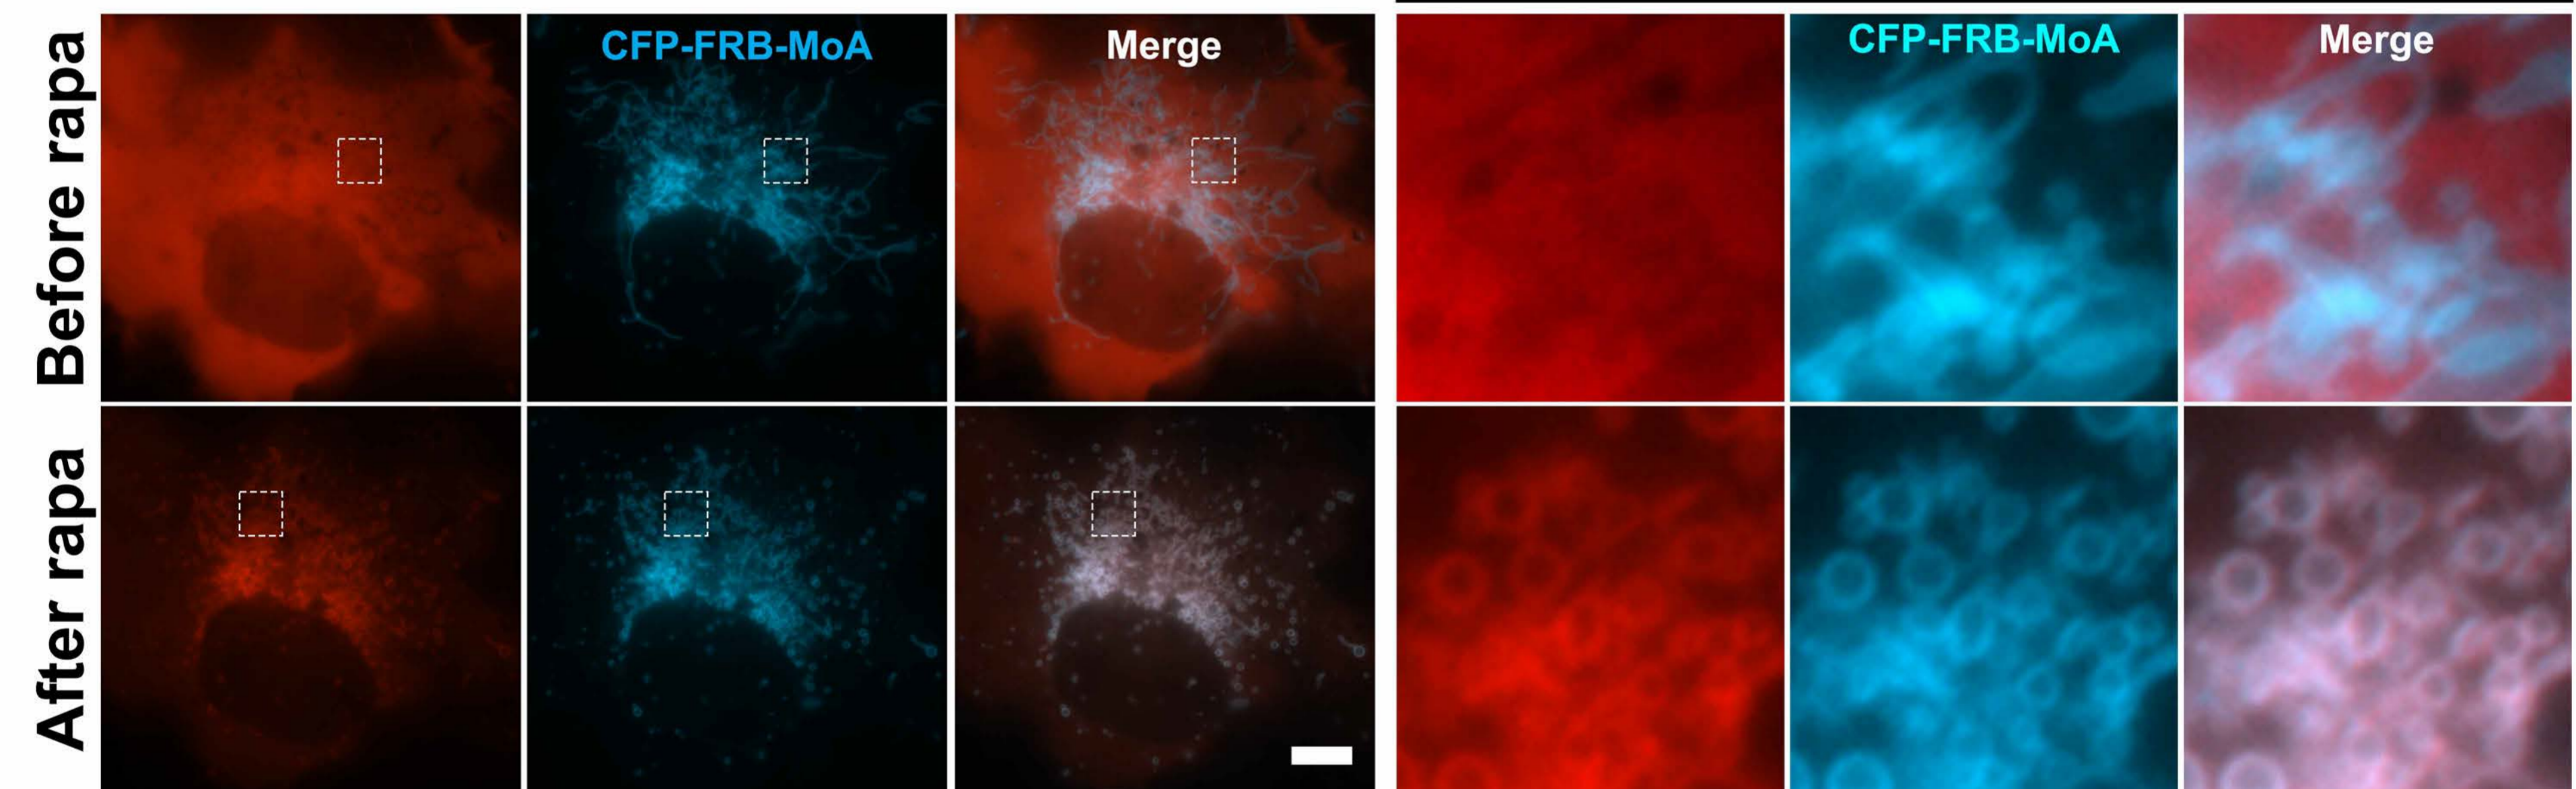

## mCherry-FKBP-15TM

### Enlarged images

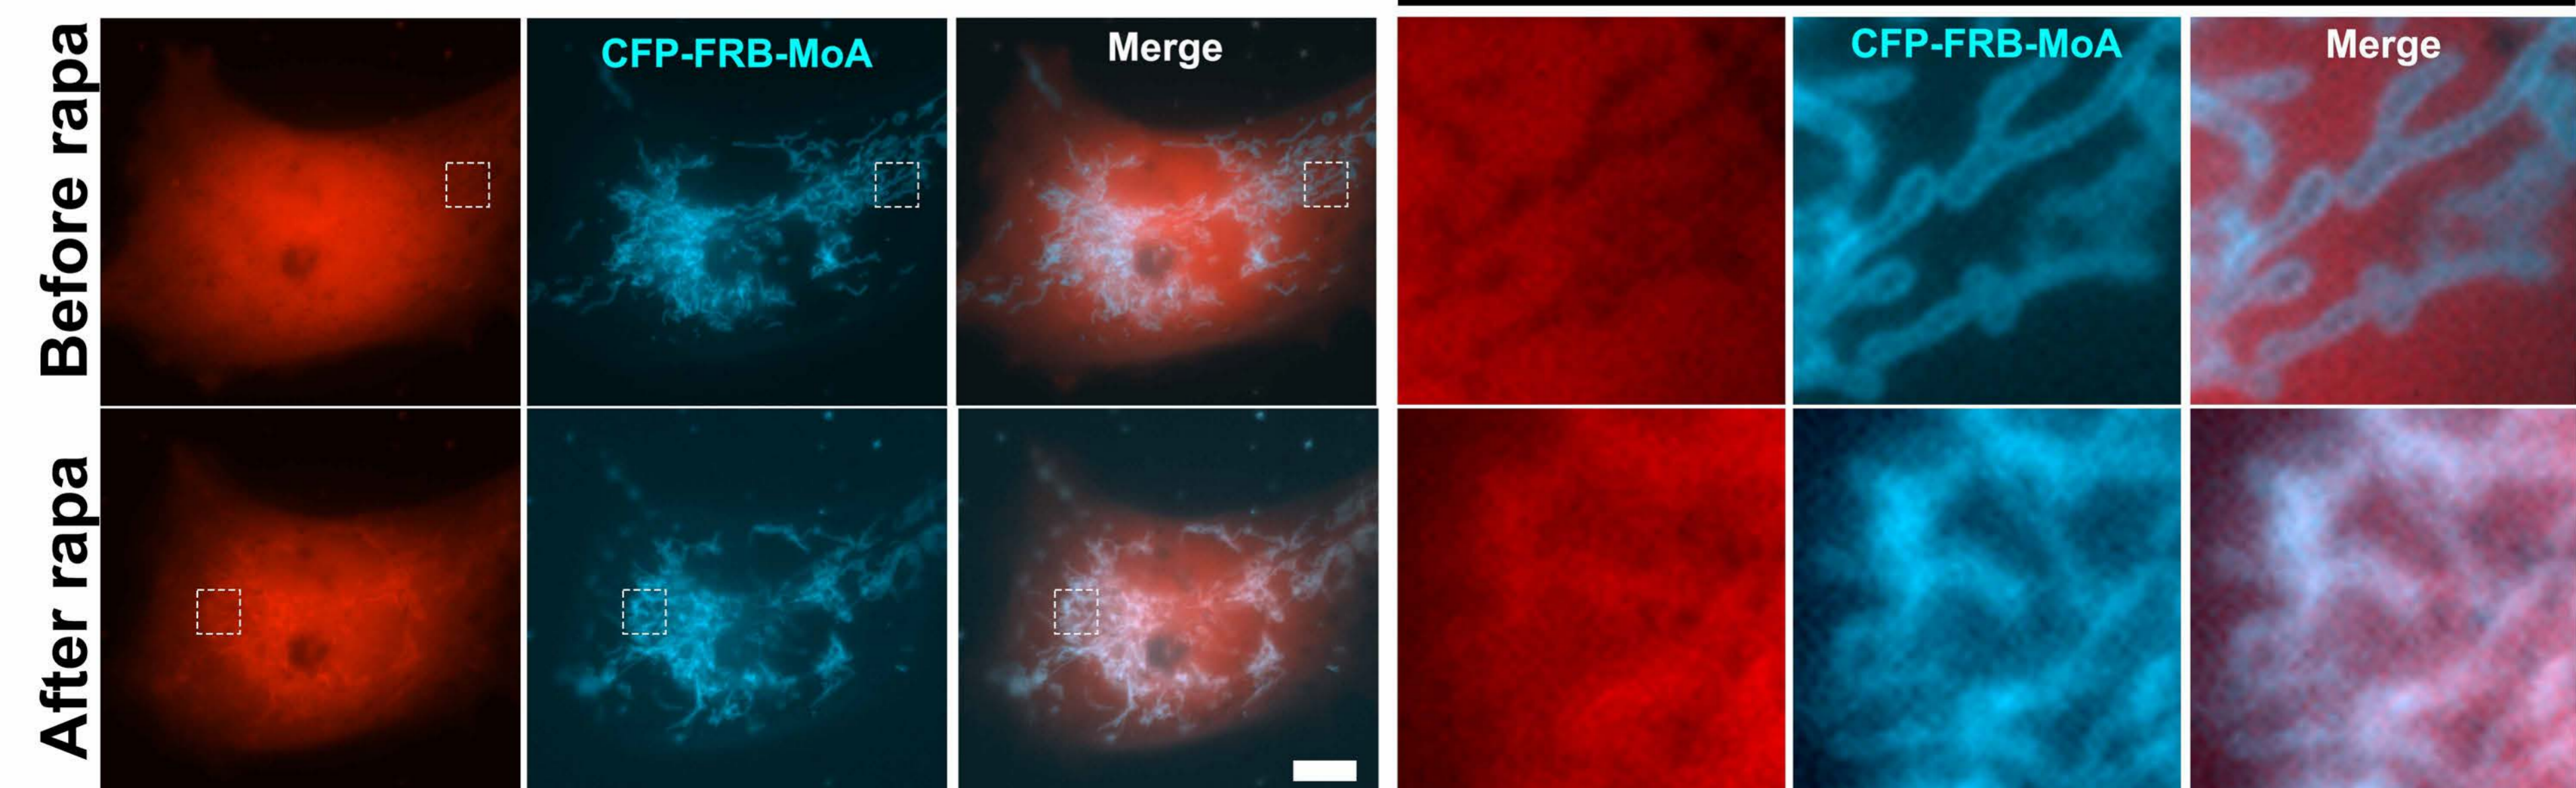

# Supplementary Figure 5

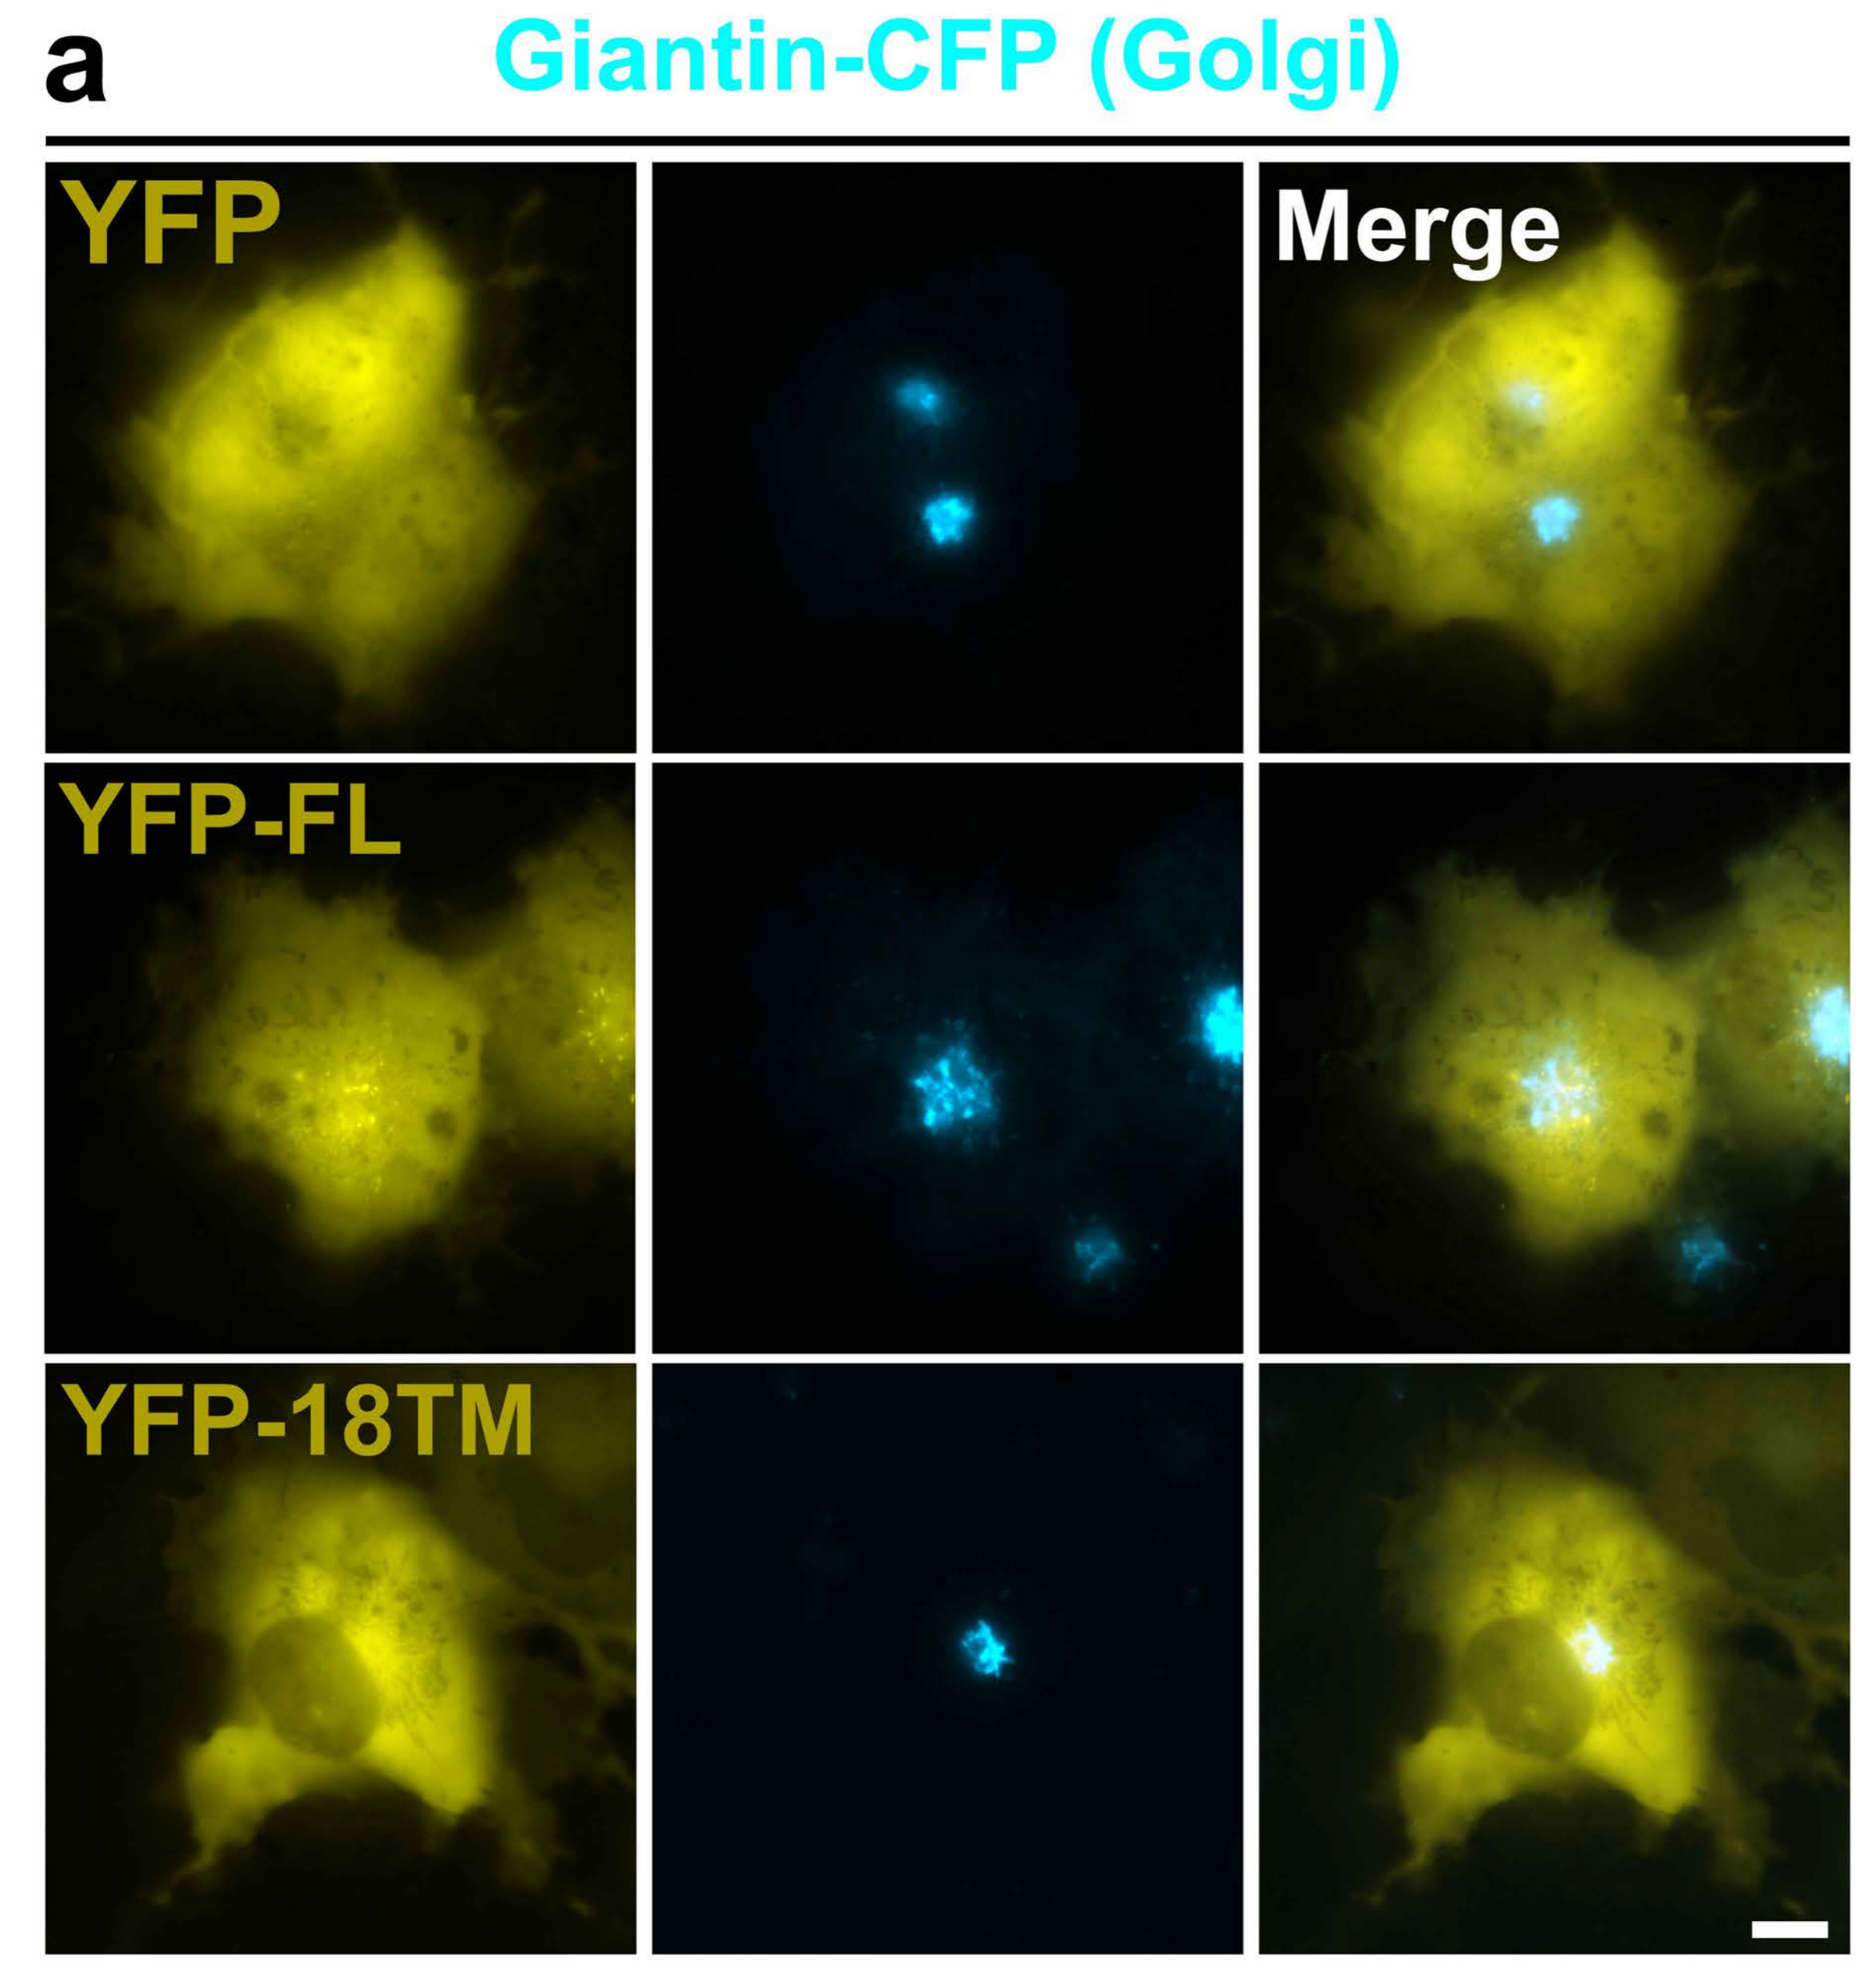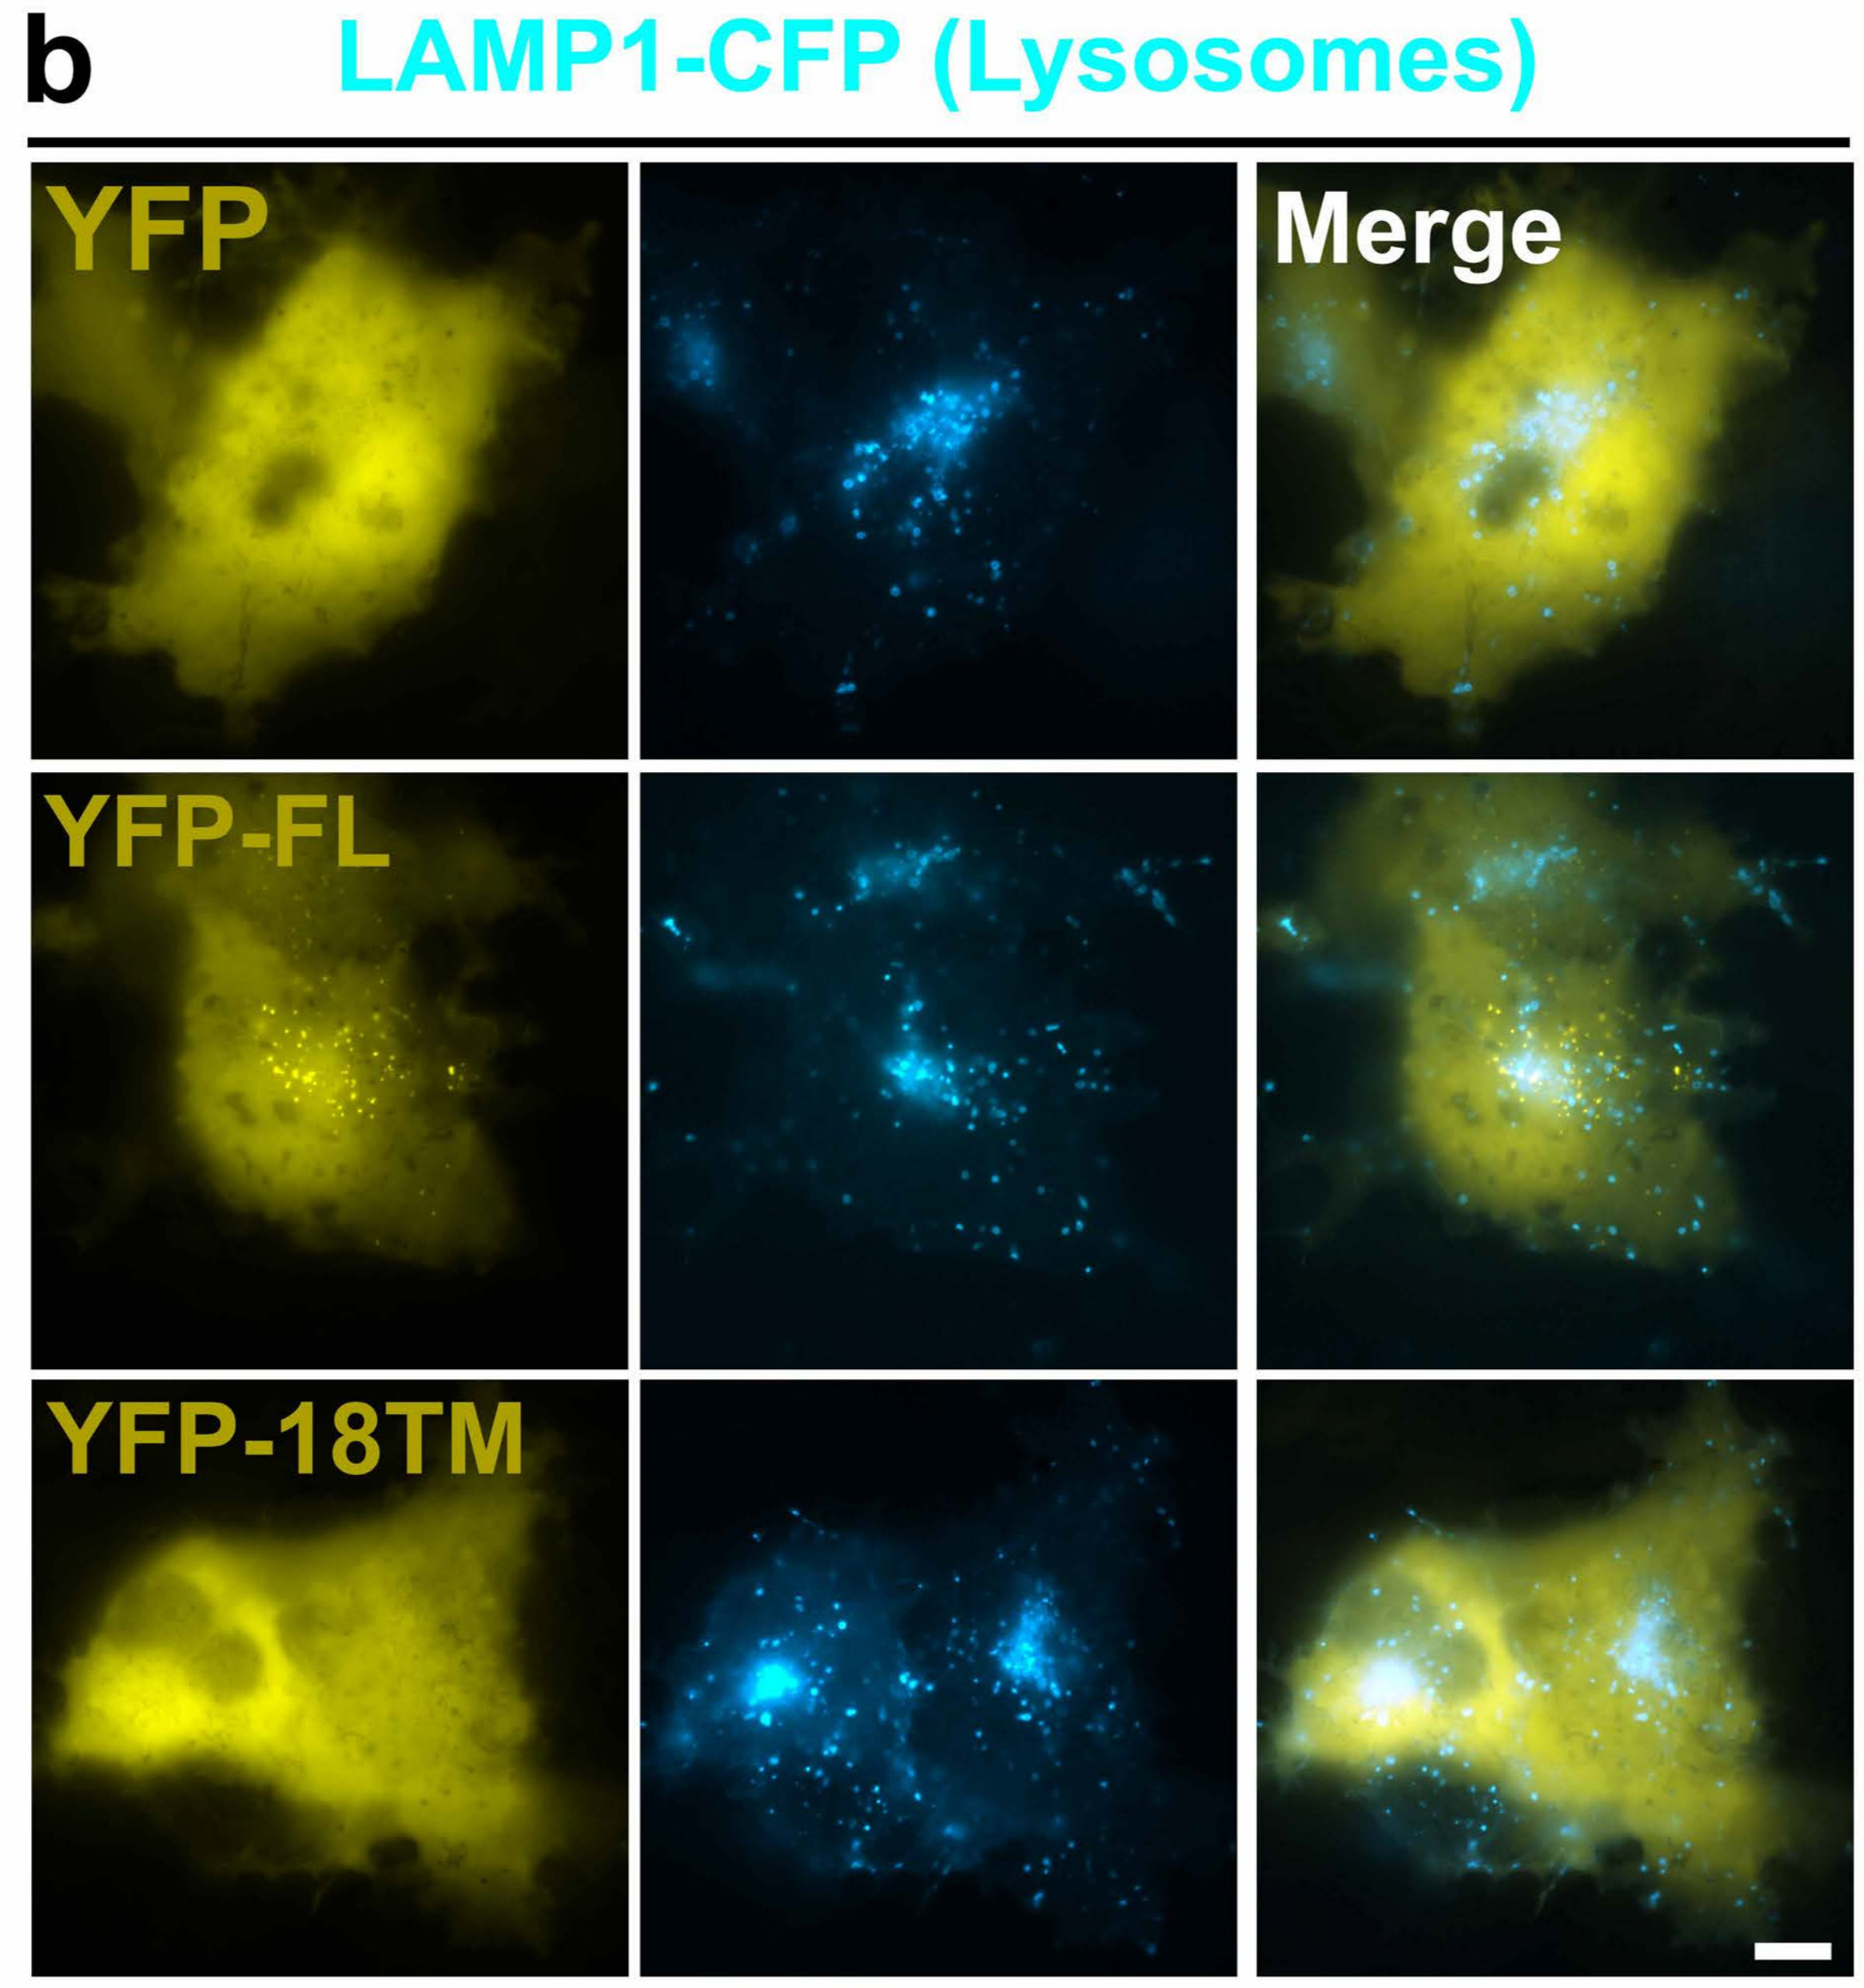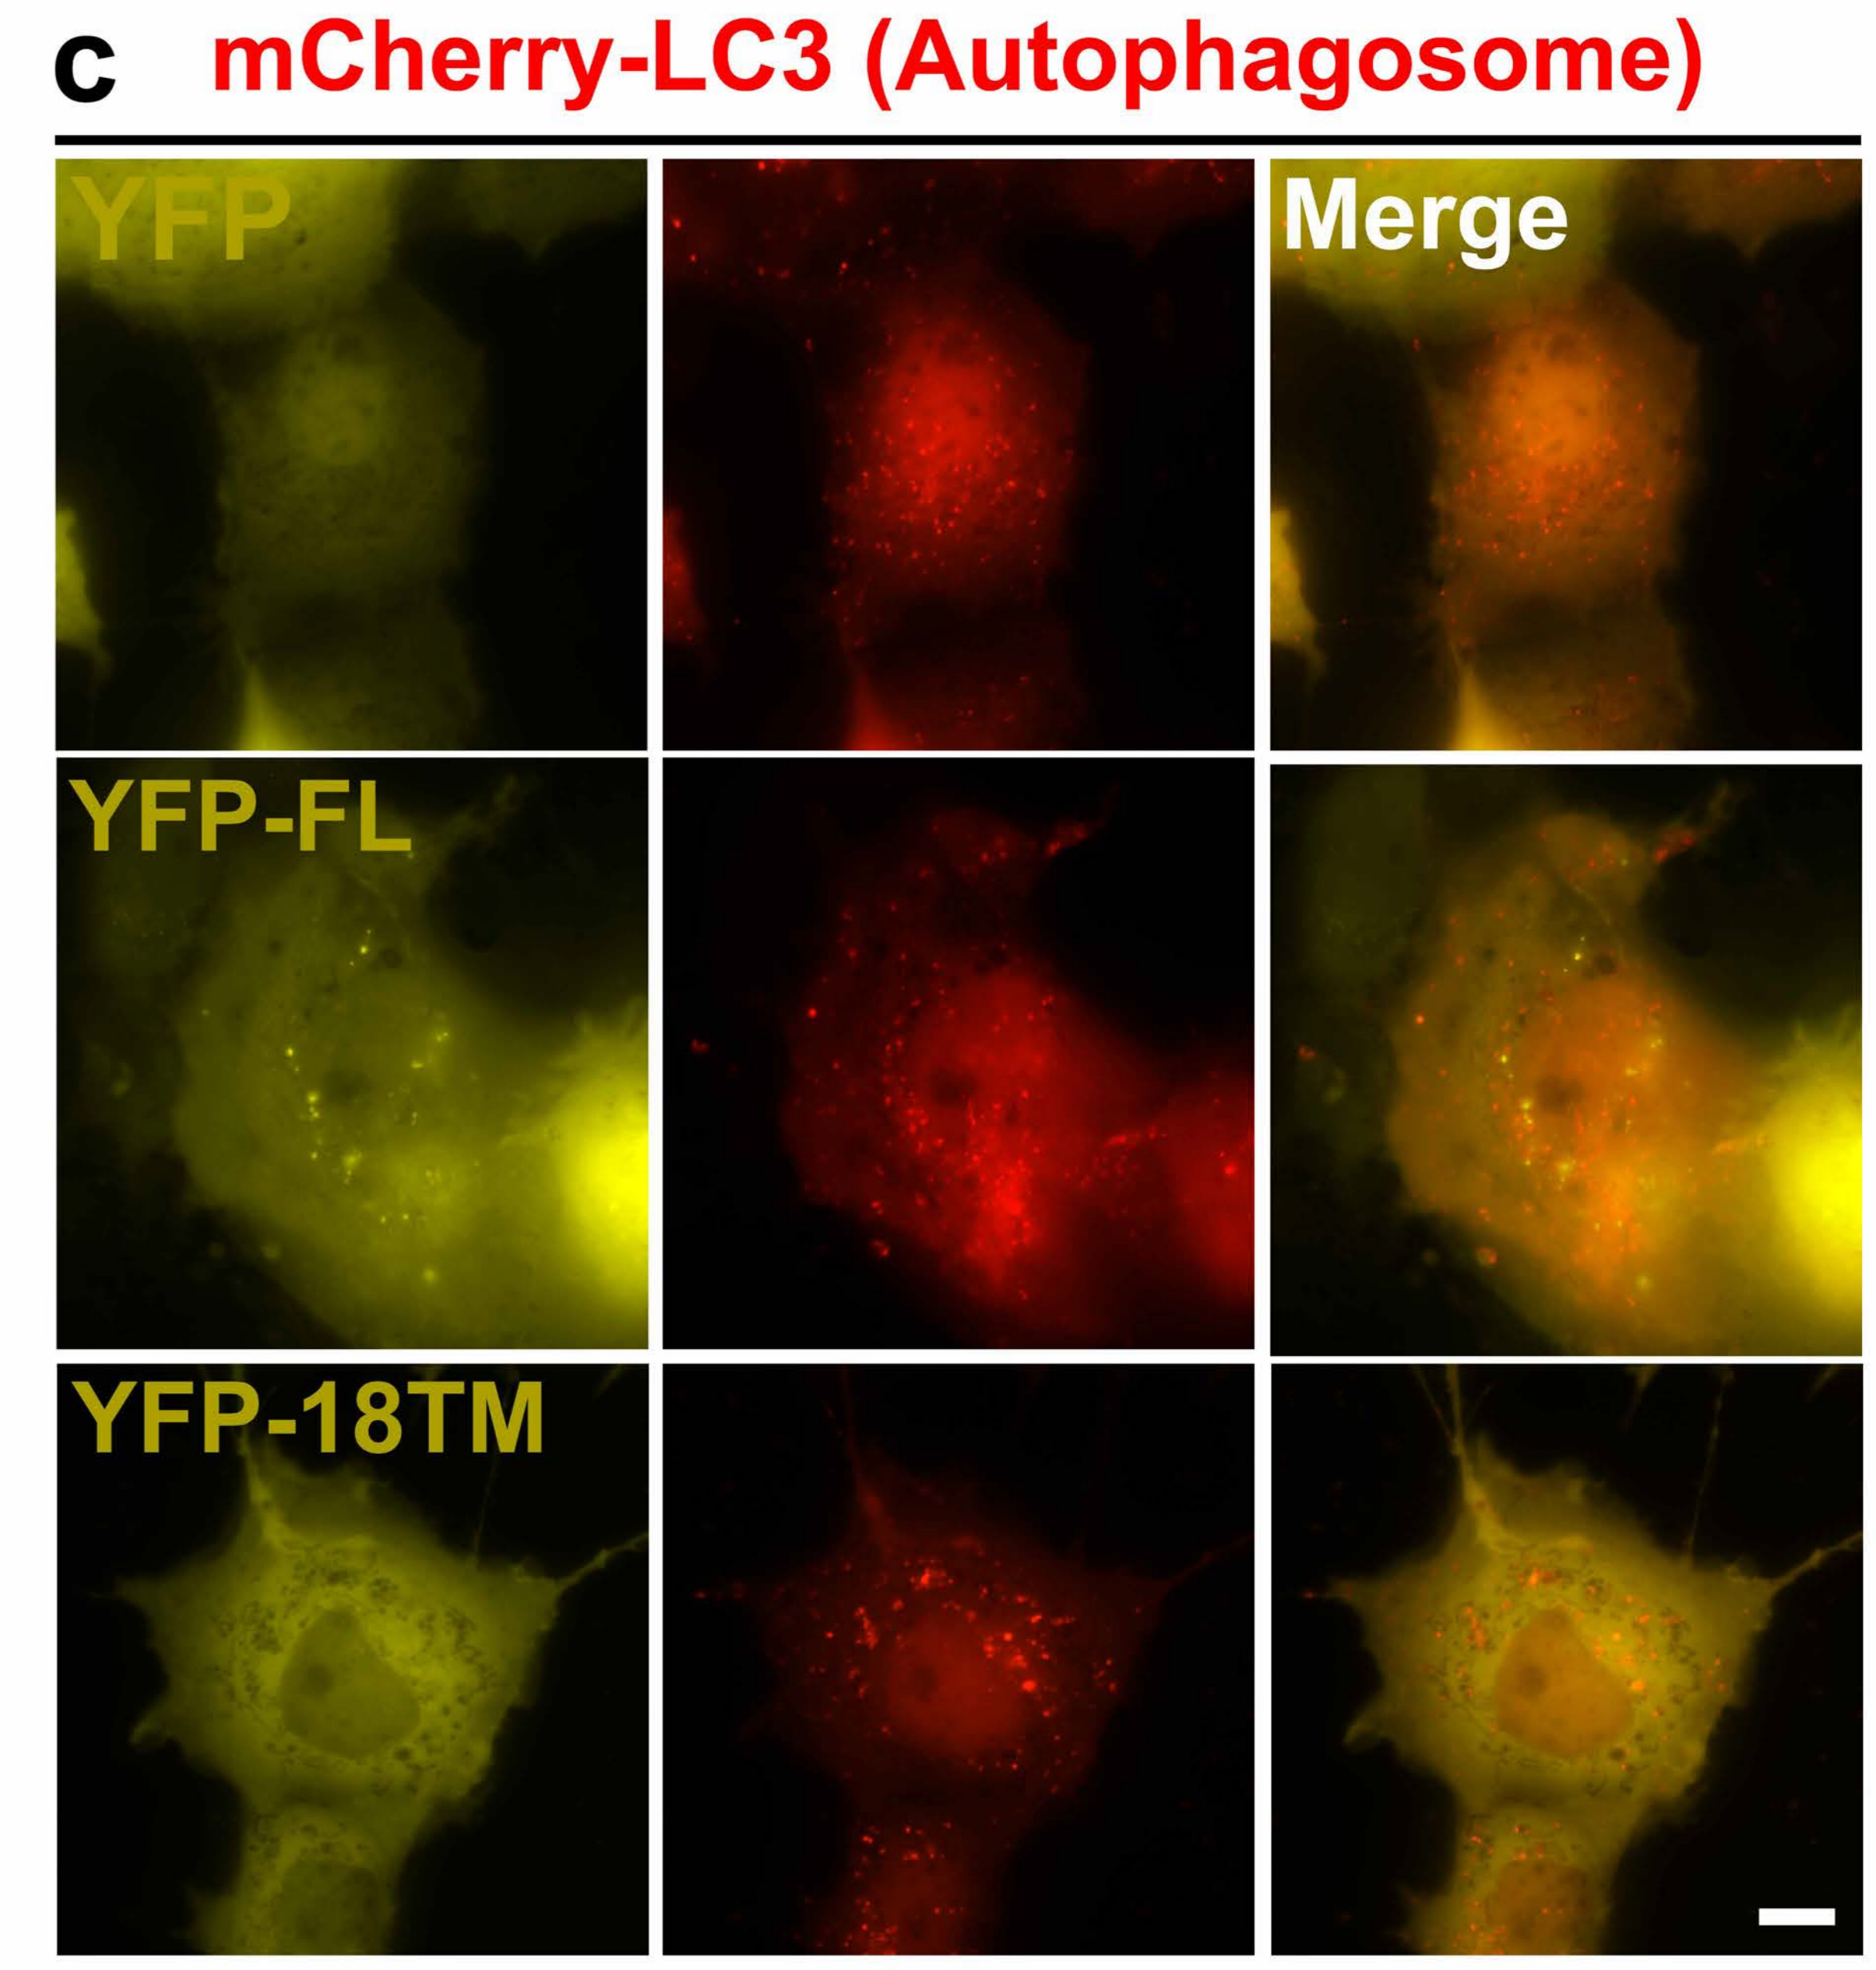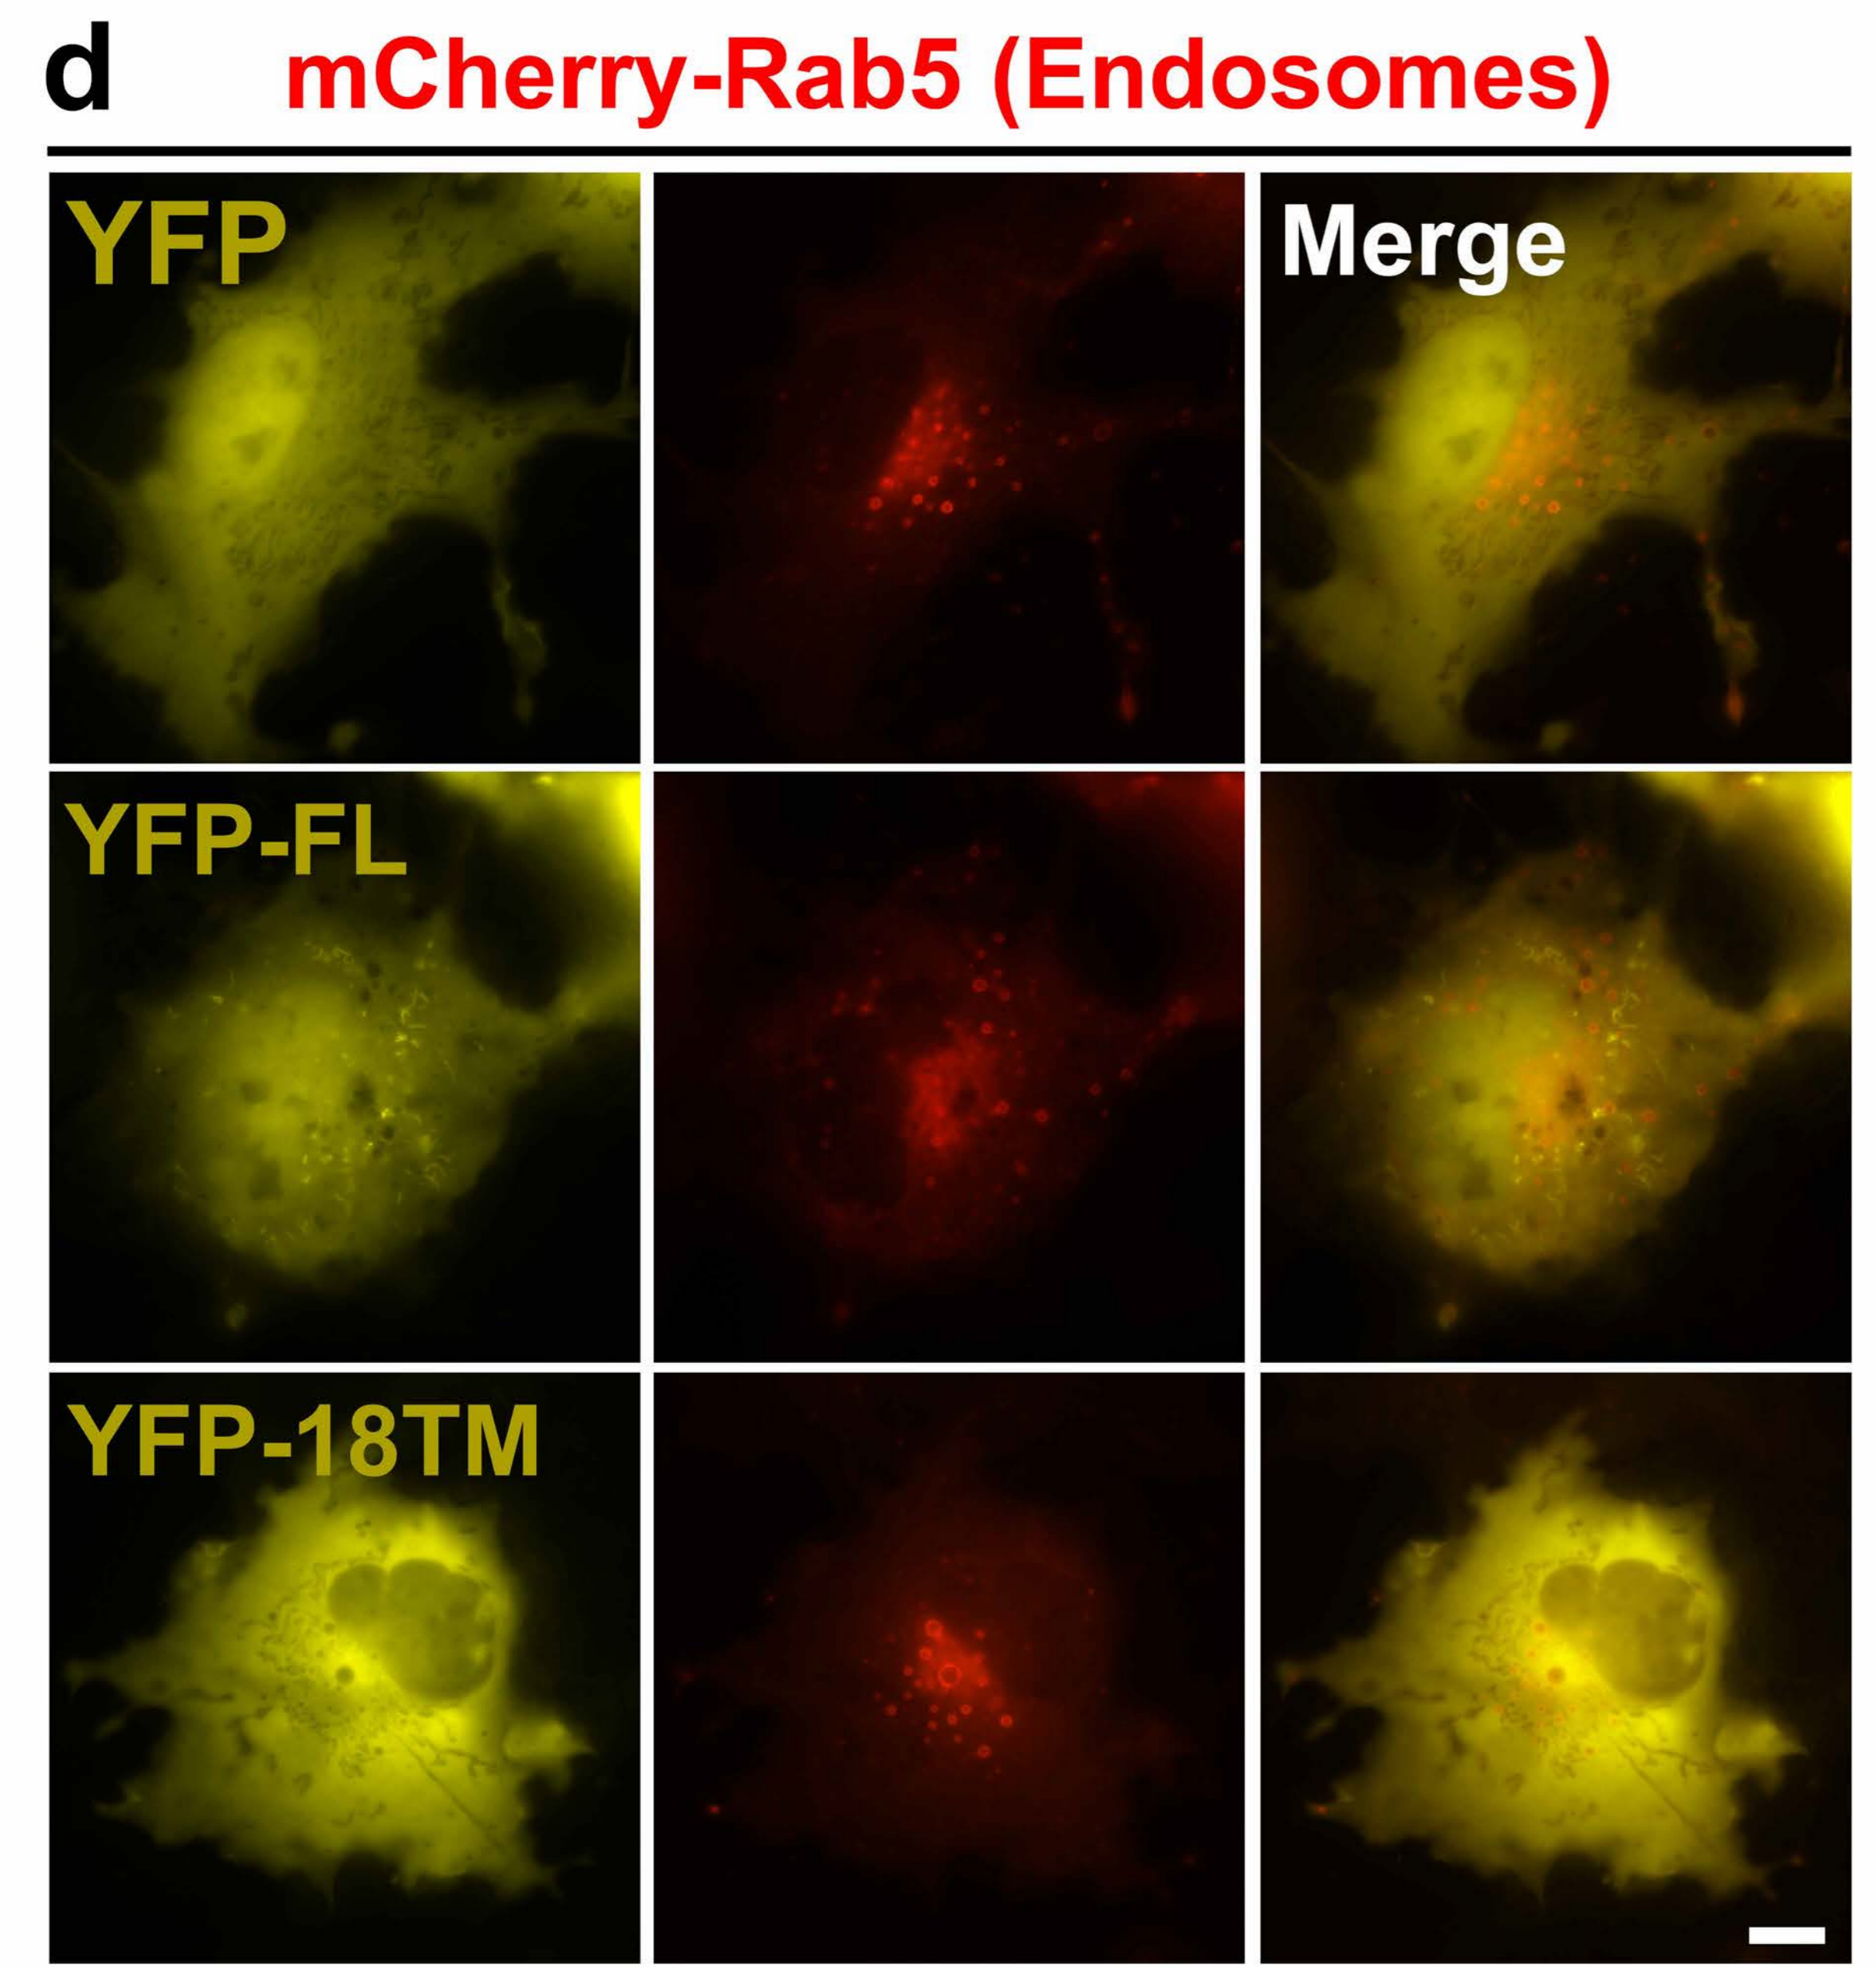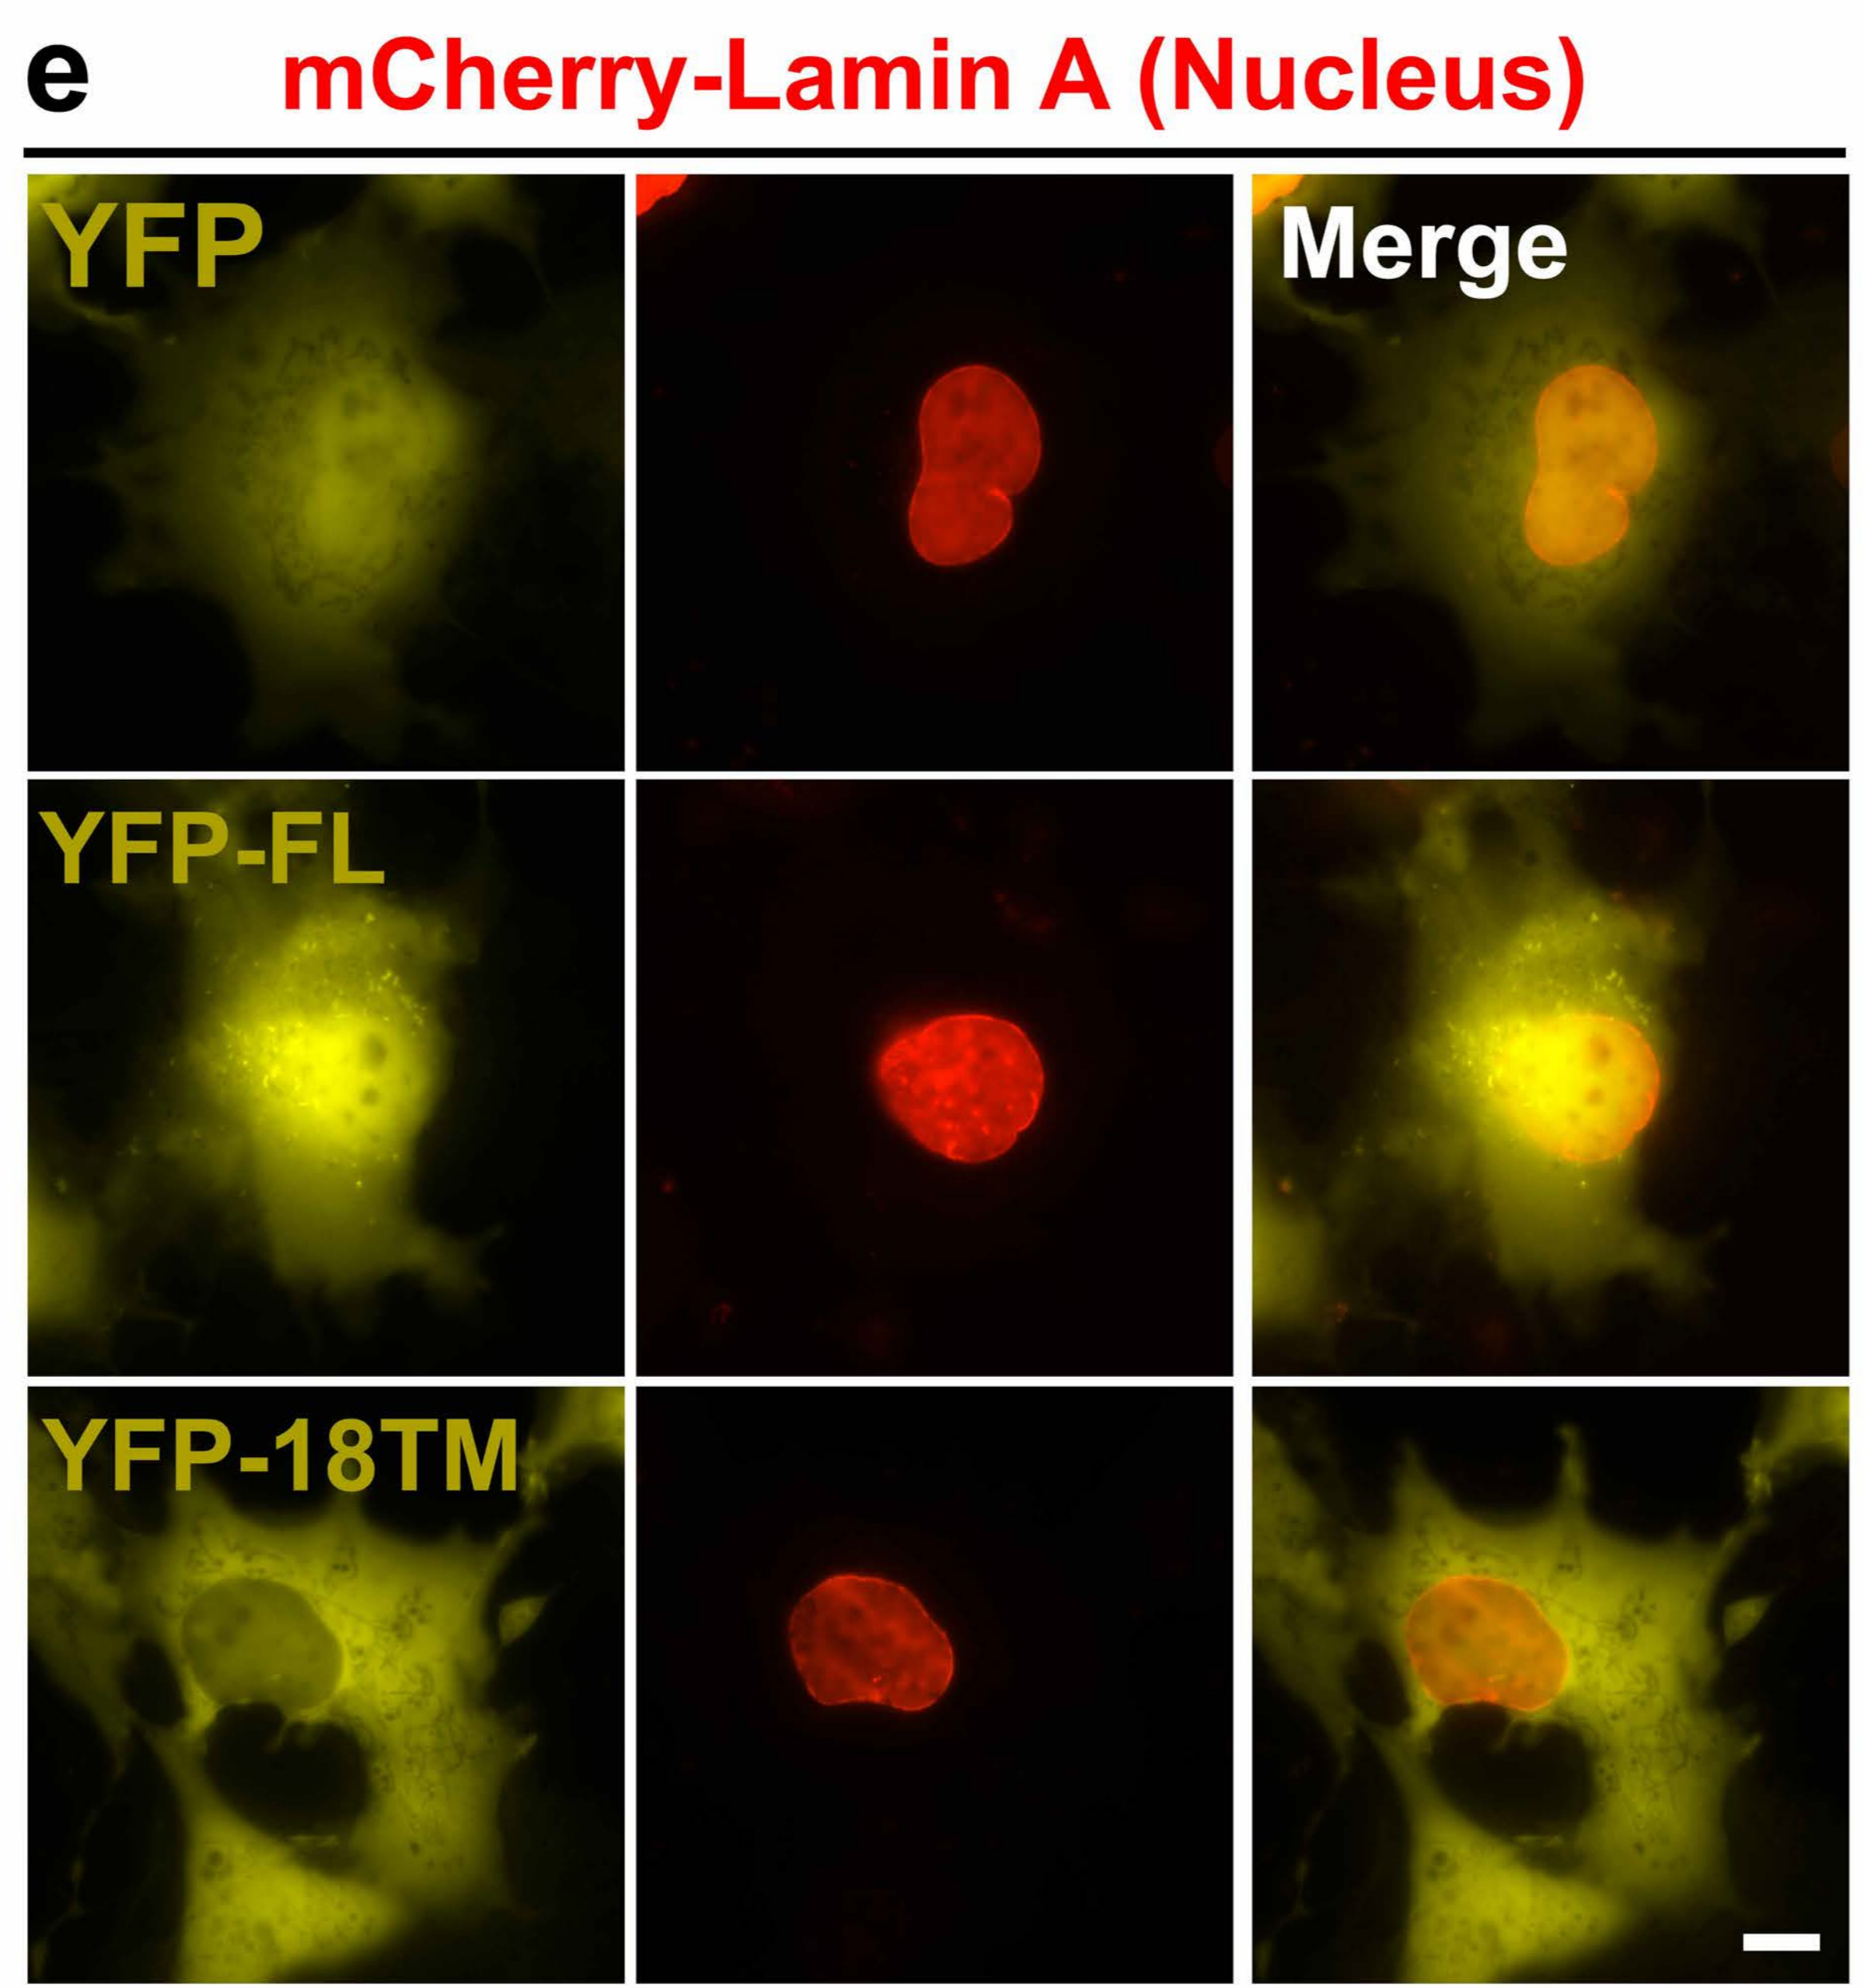

# Supplementary Figure 6

48 hrs after transfection

YFP-FKBP

YFP-FL

YFP-18TM

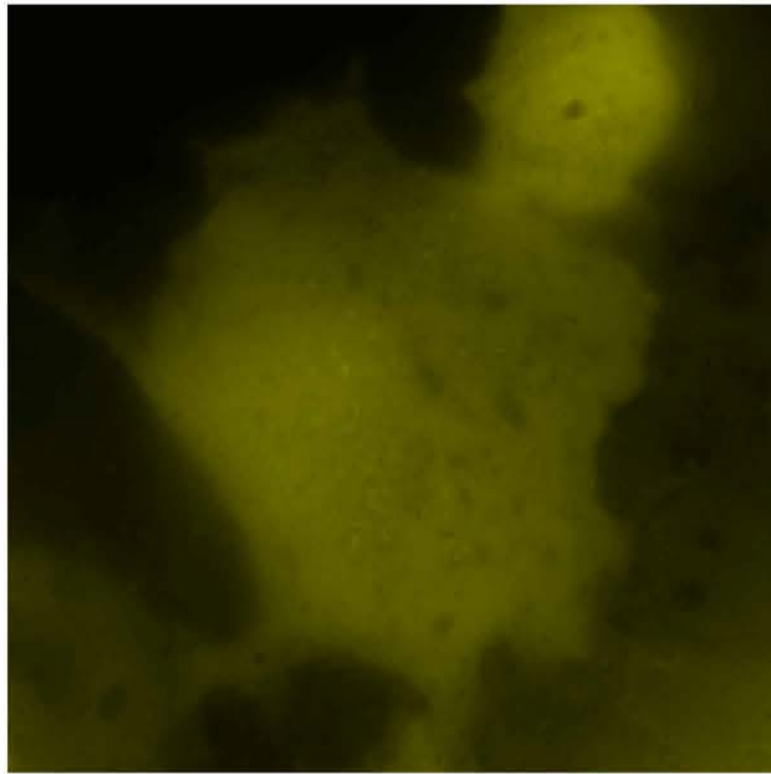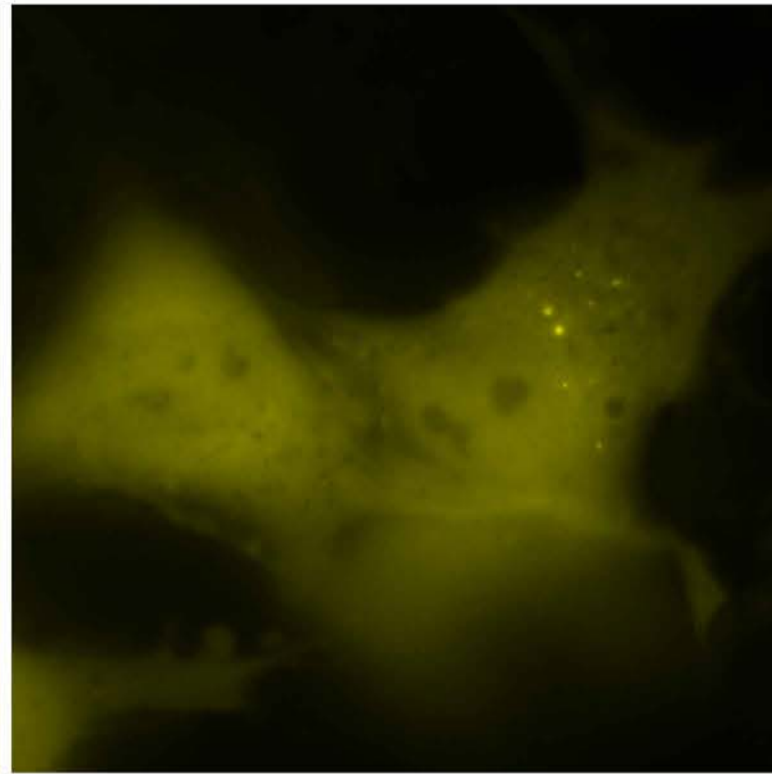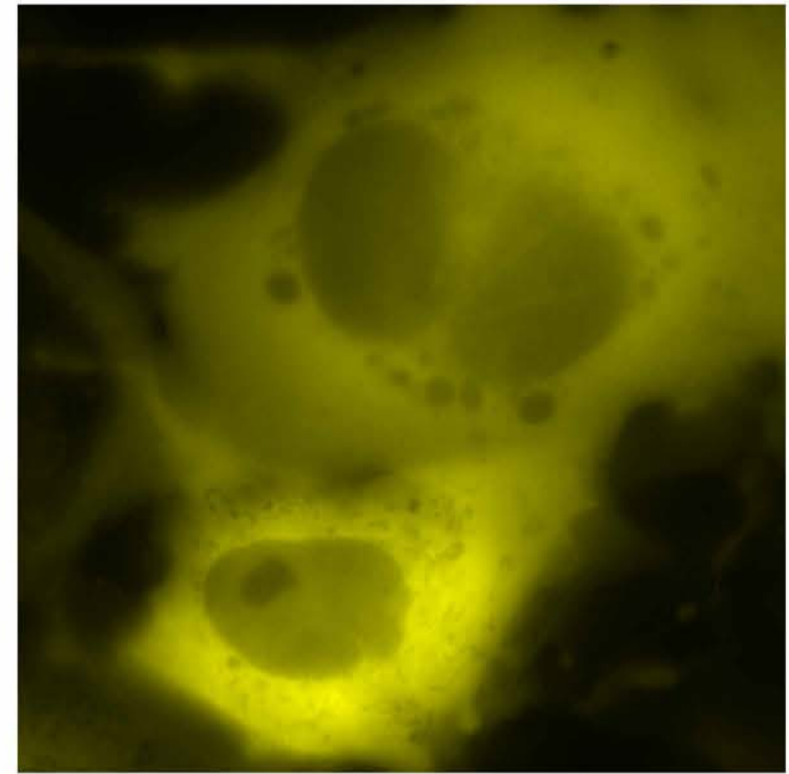

mSca-Peroxi  
(Peroxisome matrix)

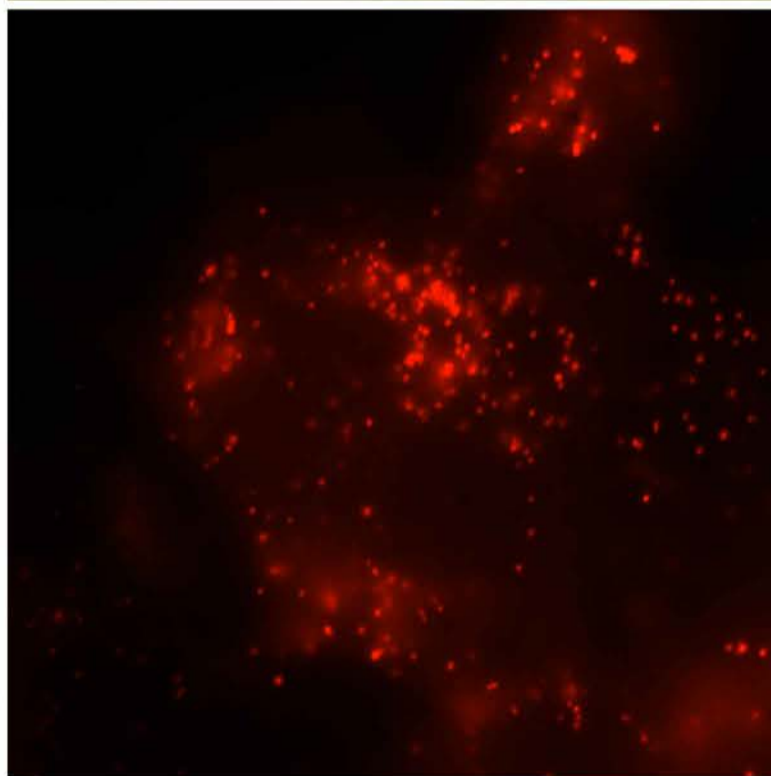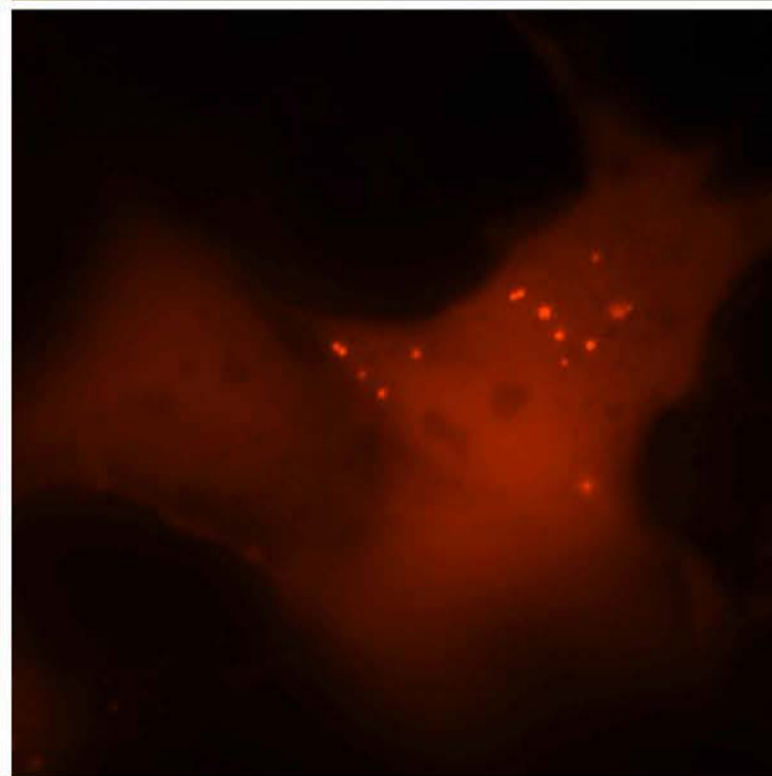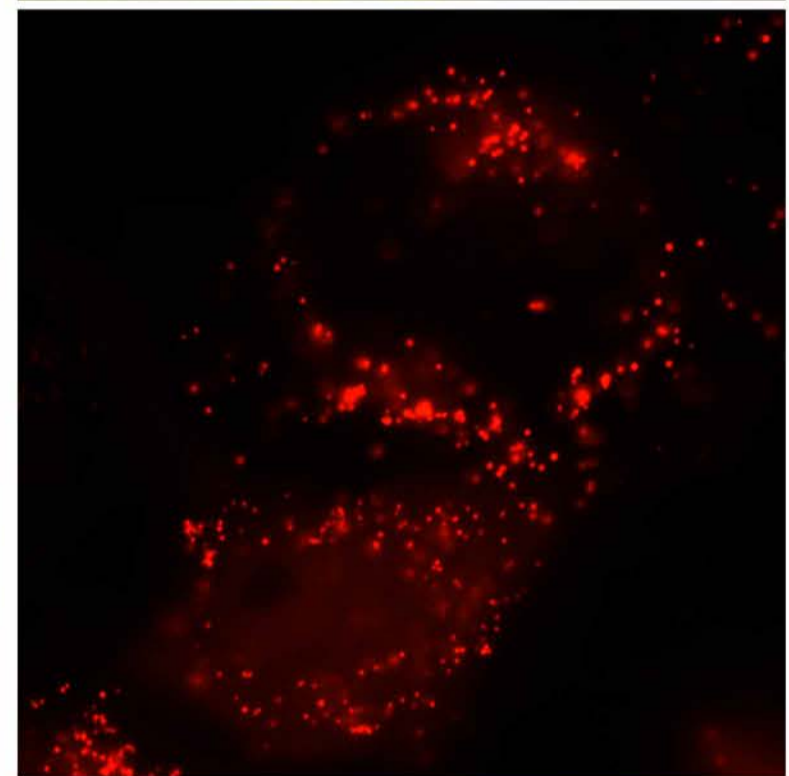

Merge

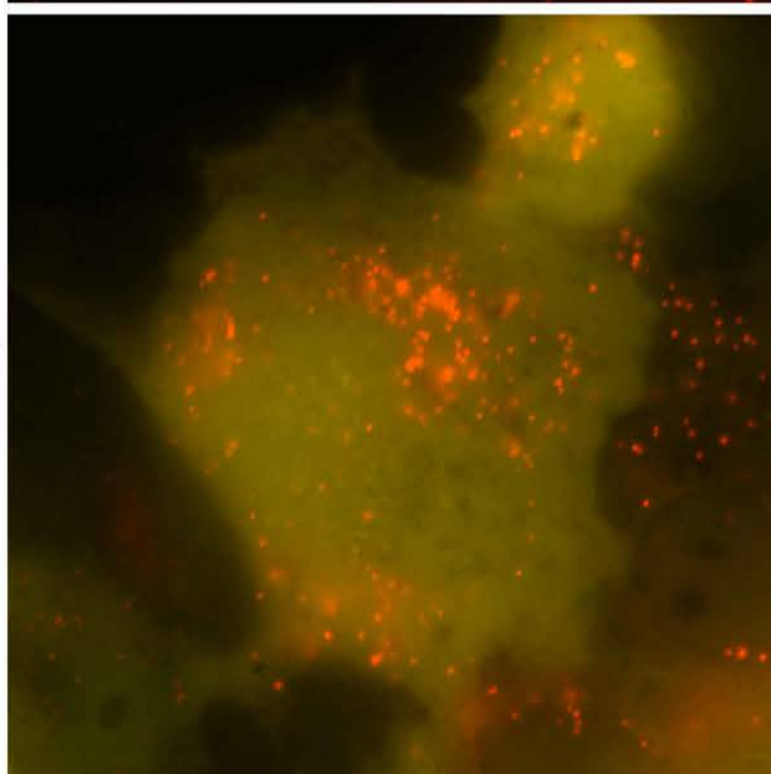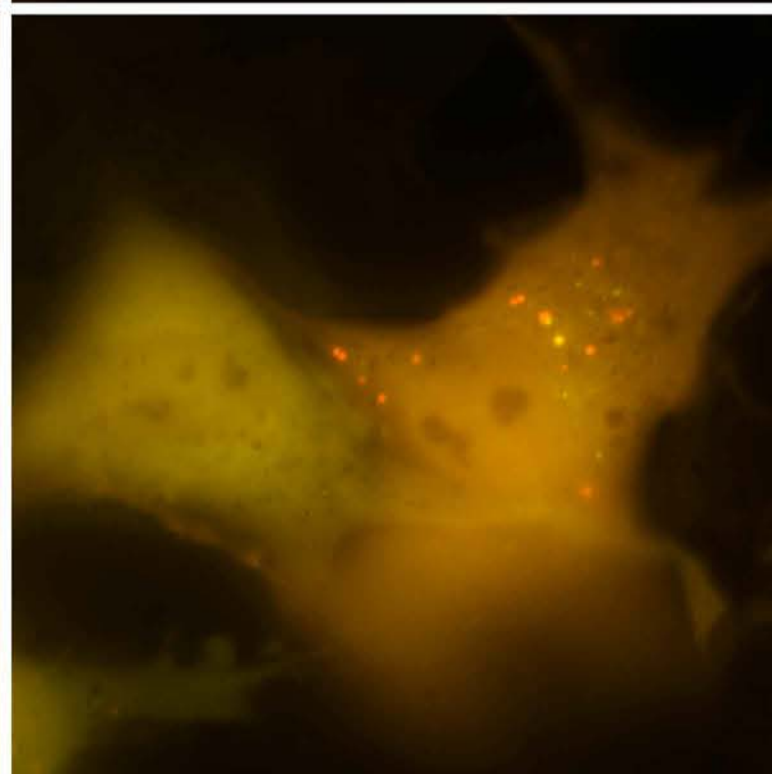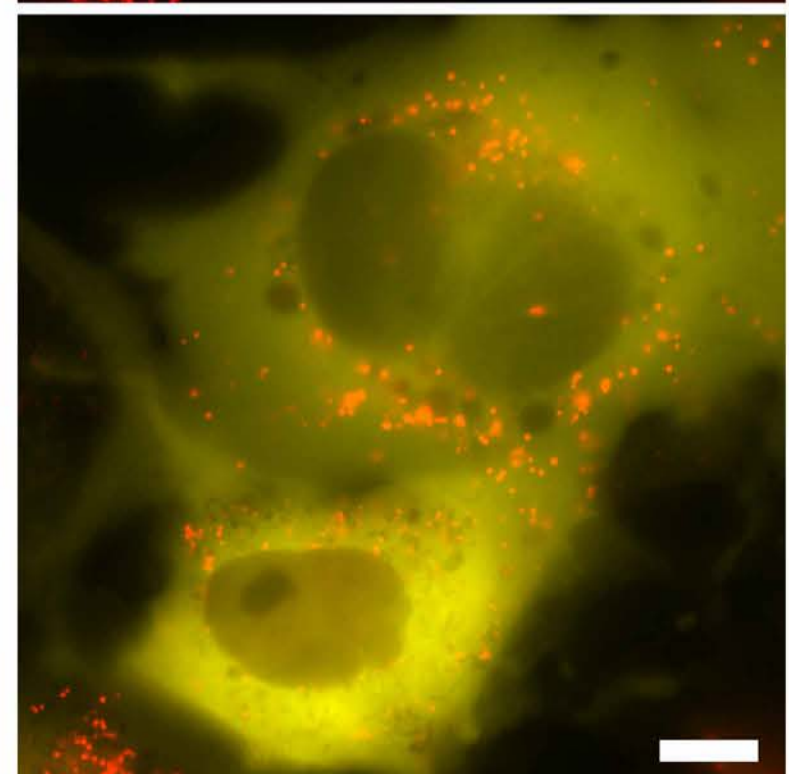

# Supplementary Figure 7

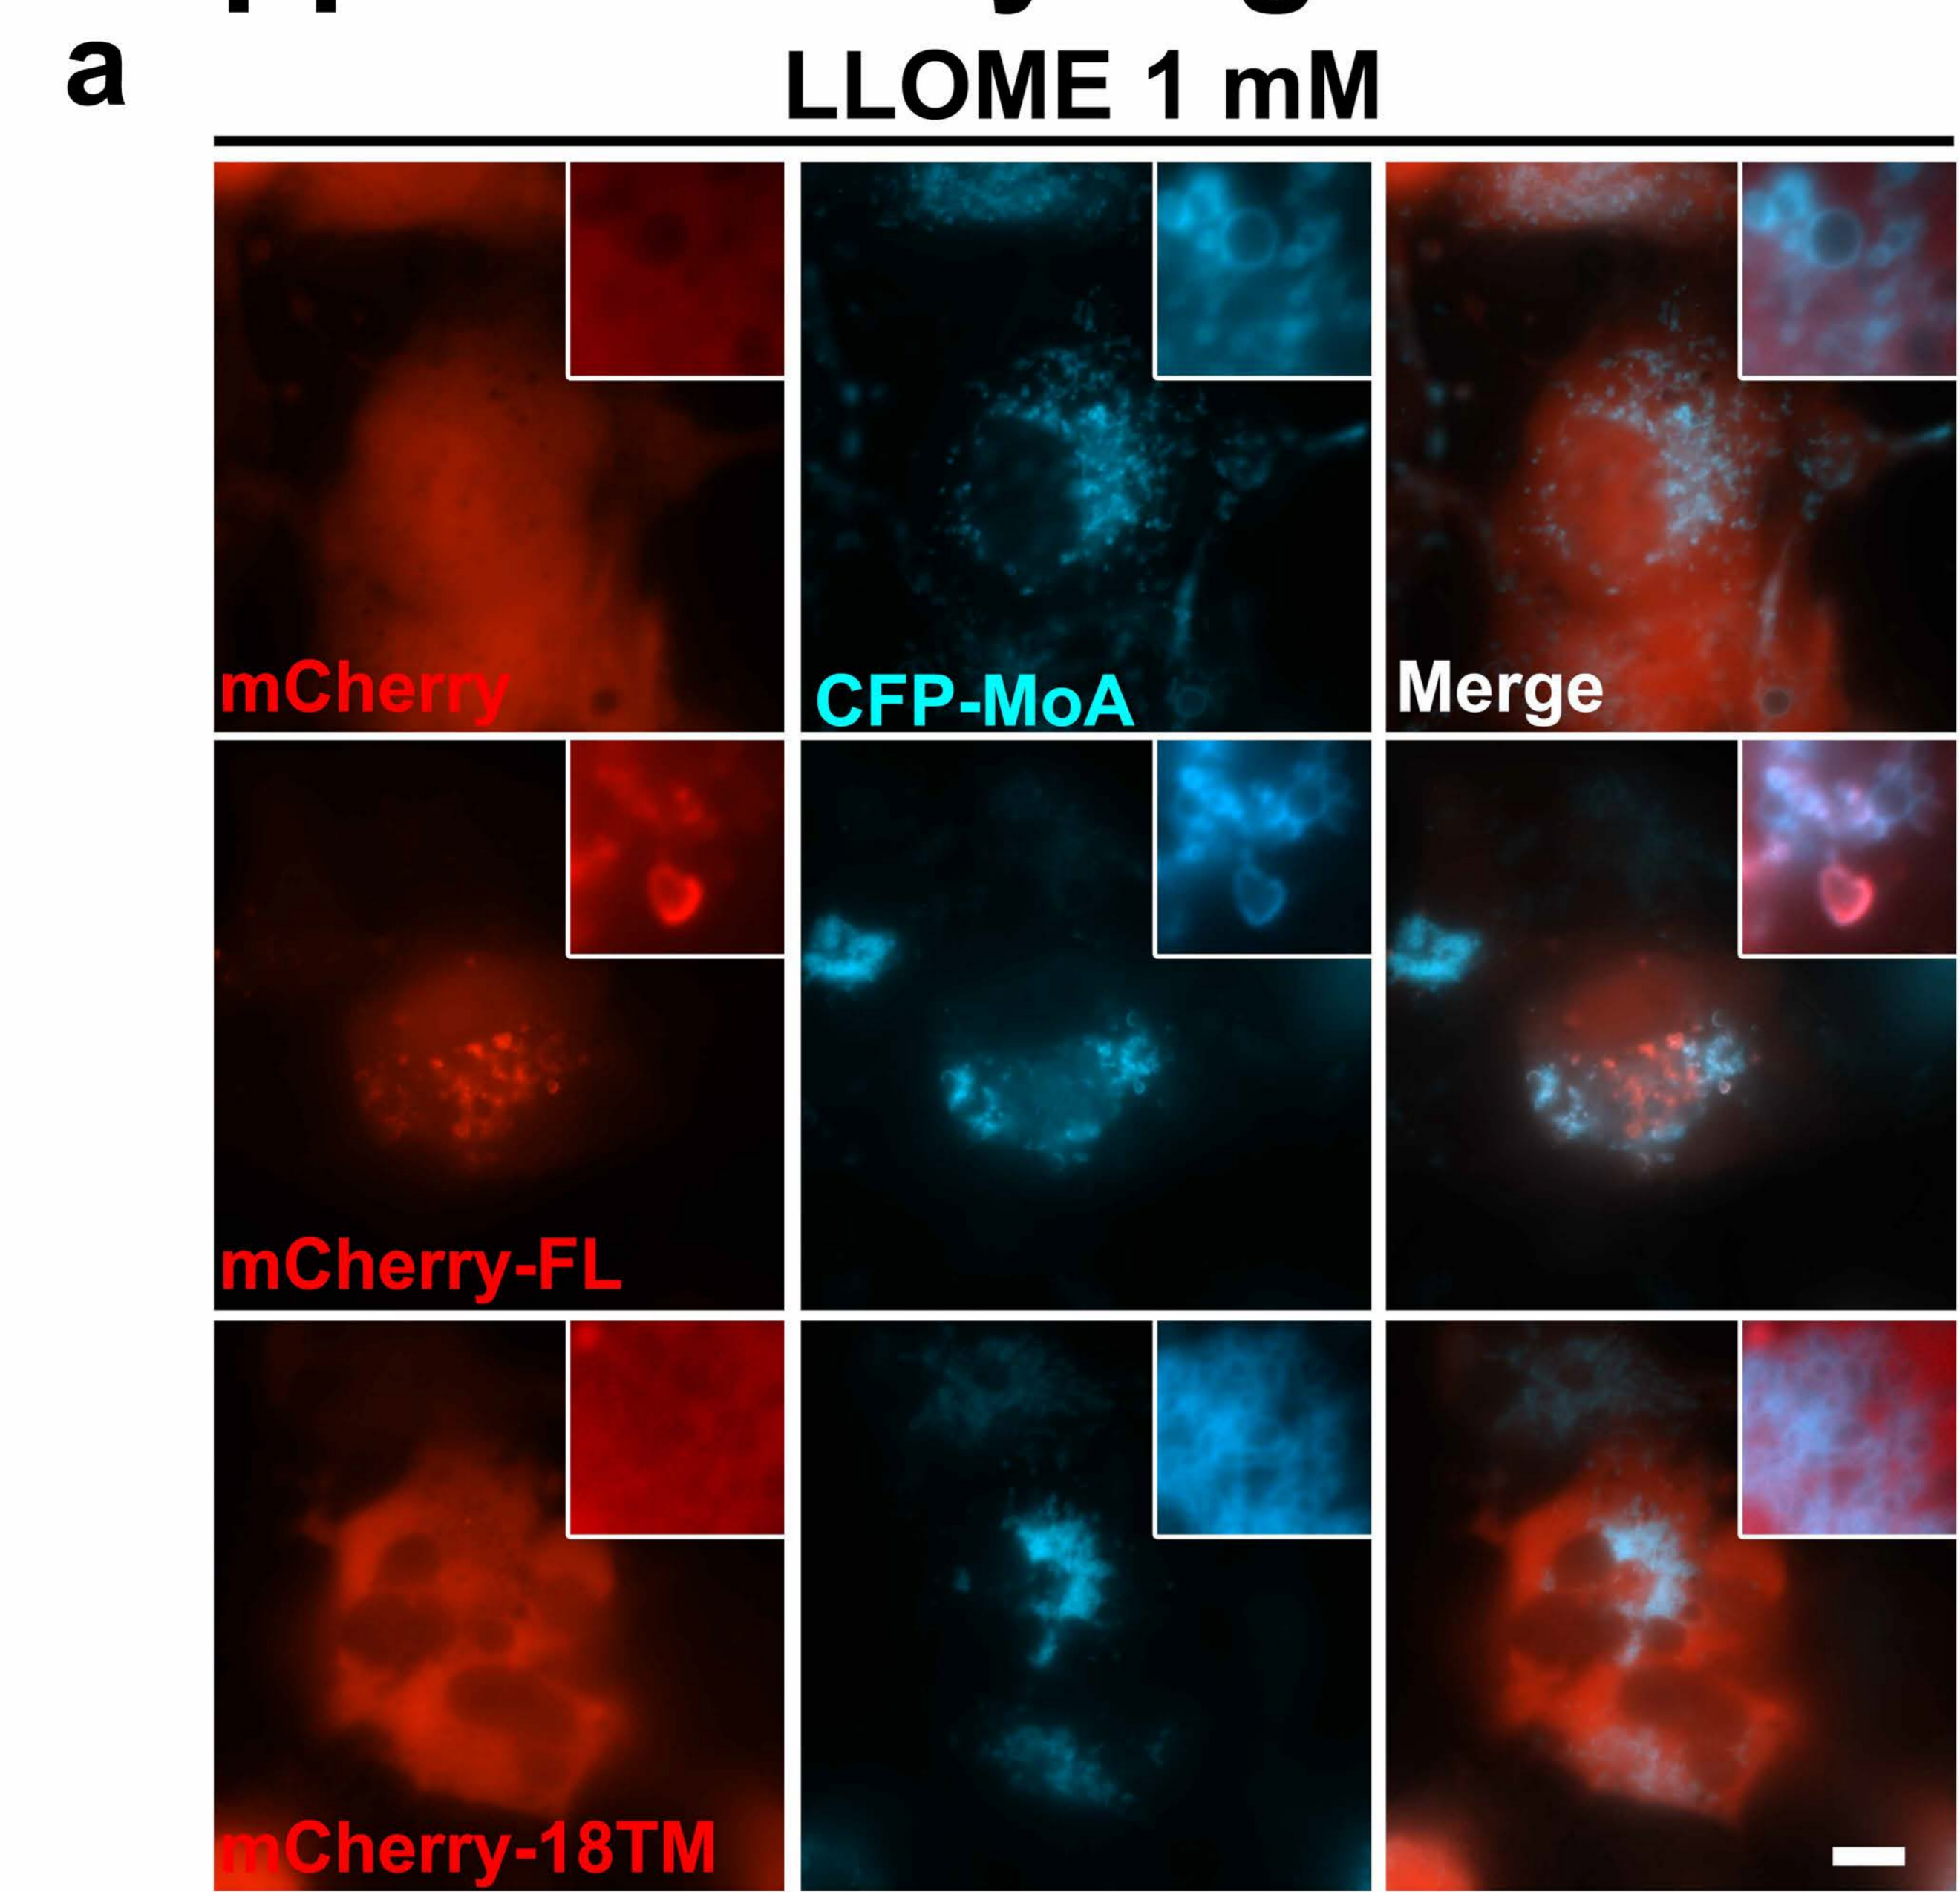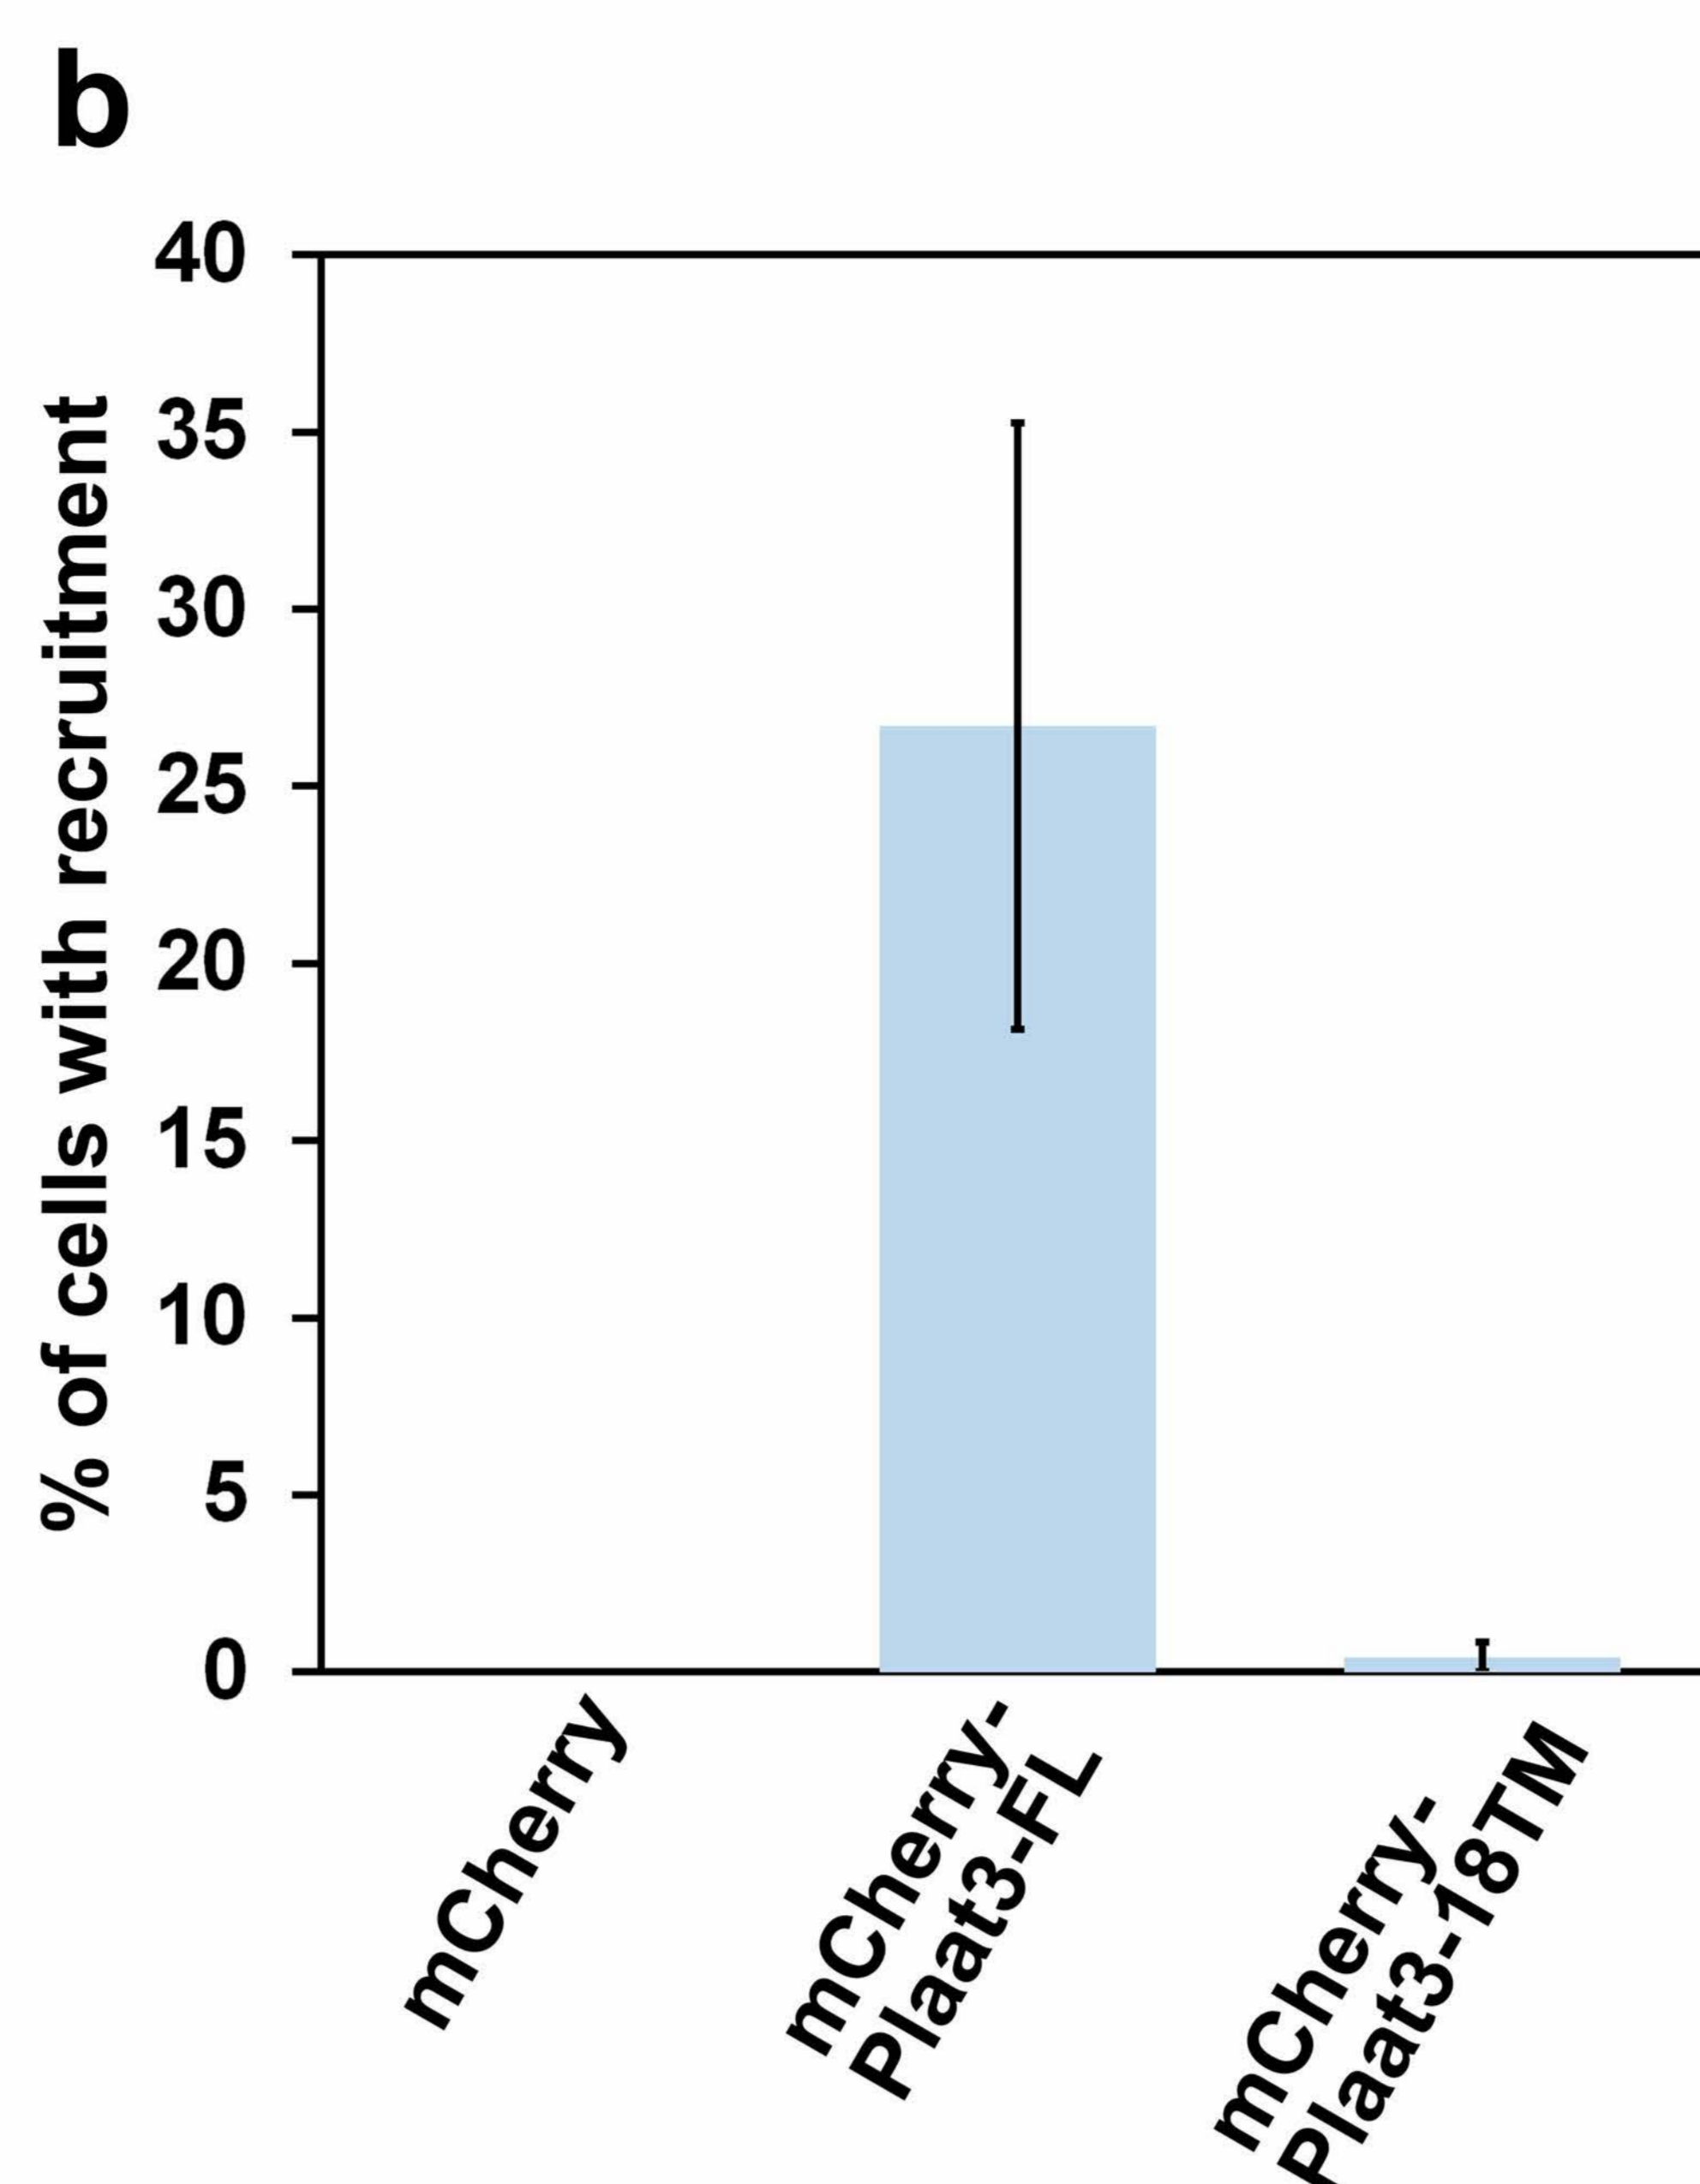

**i**

|         | Spontaneous recruit | Stress-induced recruit |
|---------|---------------------|------------------------|
| FL      | +                   | +                      |
| FL-LD   | +                   | +                      |
| 18TM    | -                   | -                      |
| 18TM-LD | -                   | -                      |

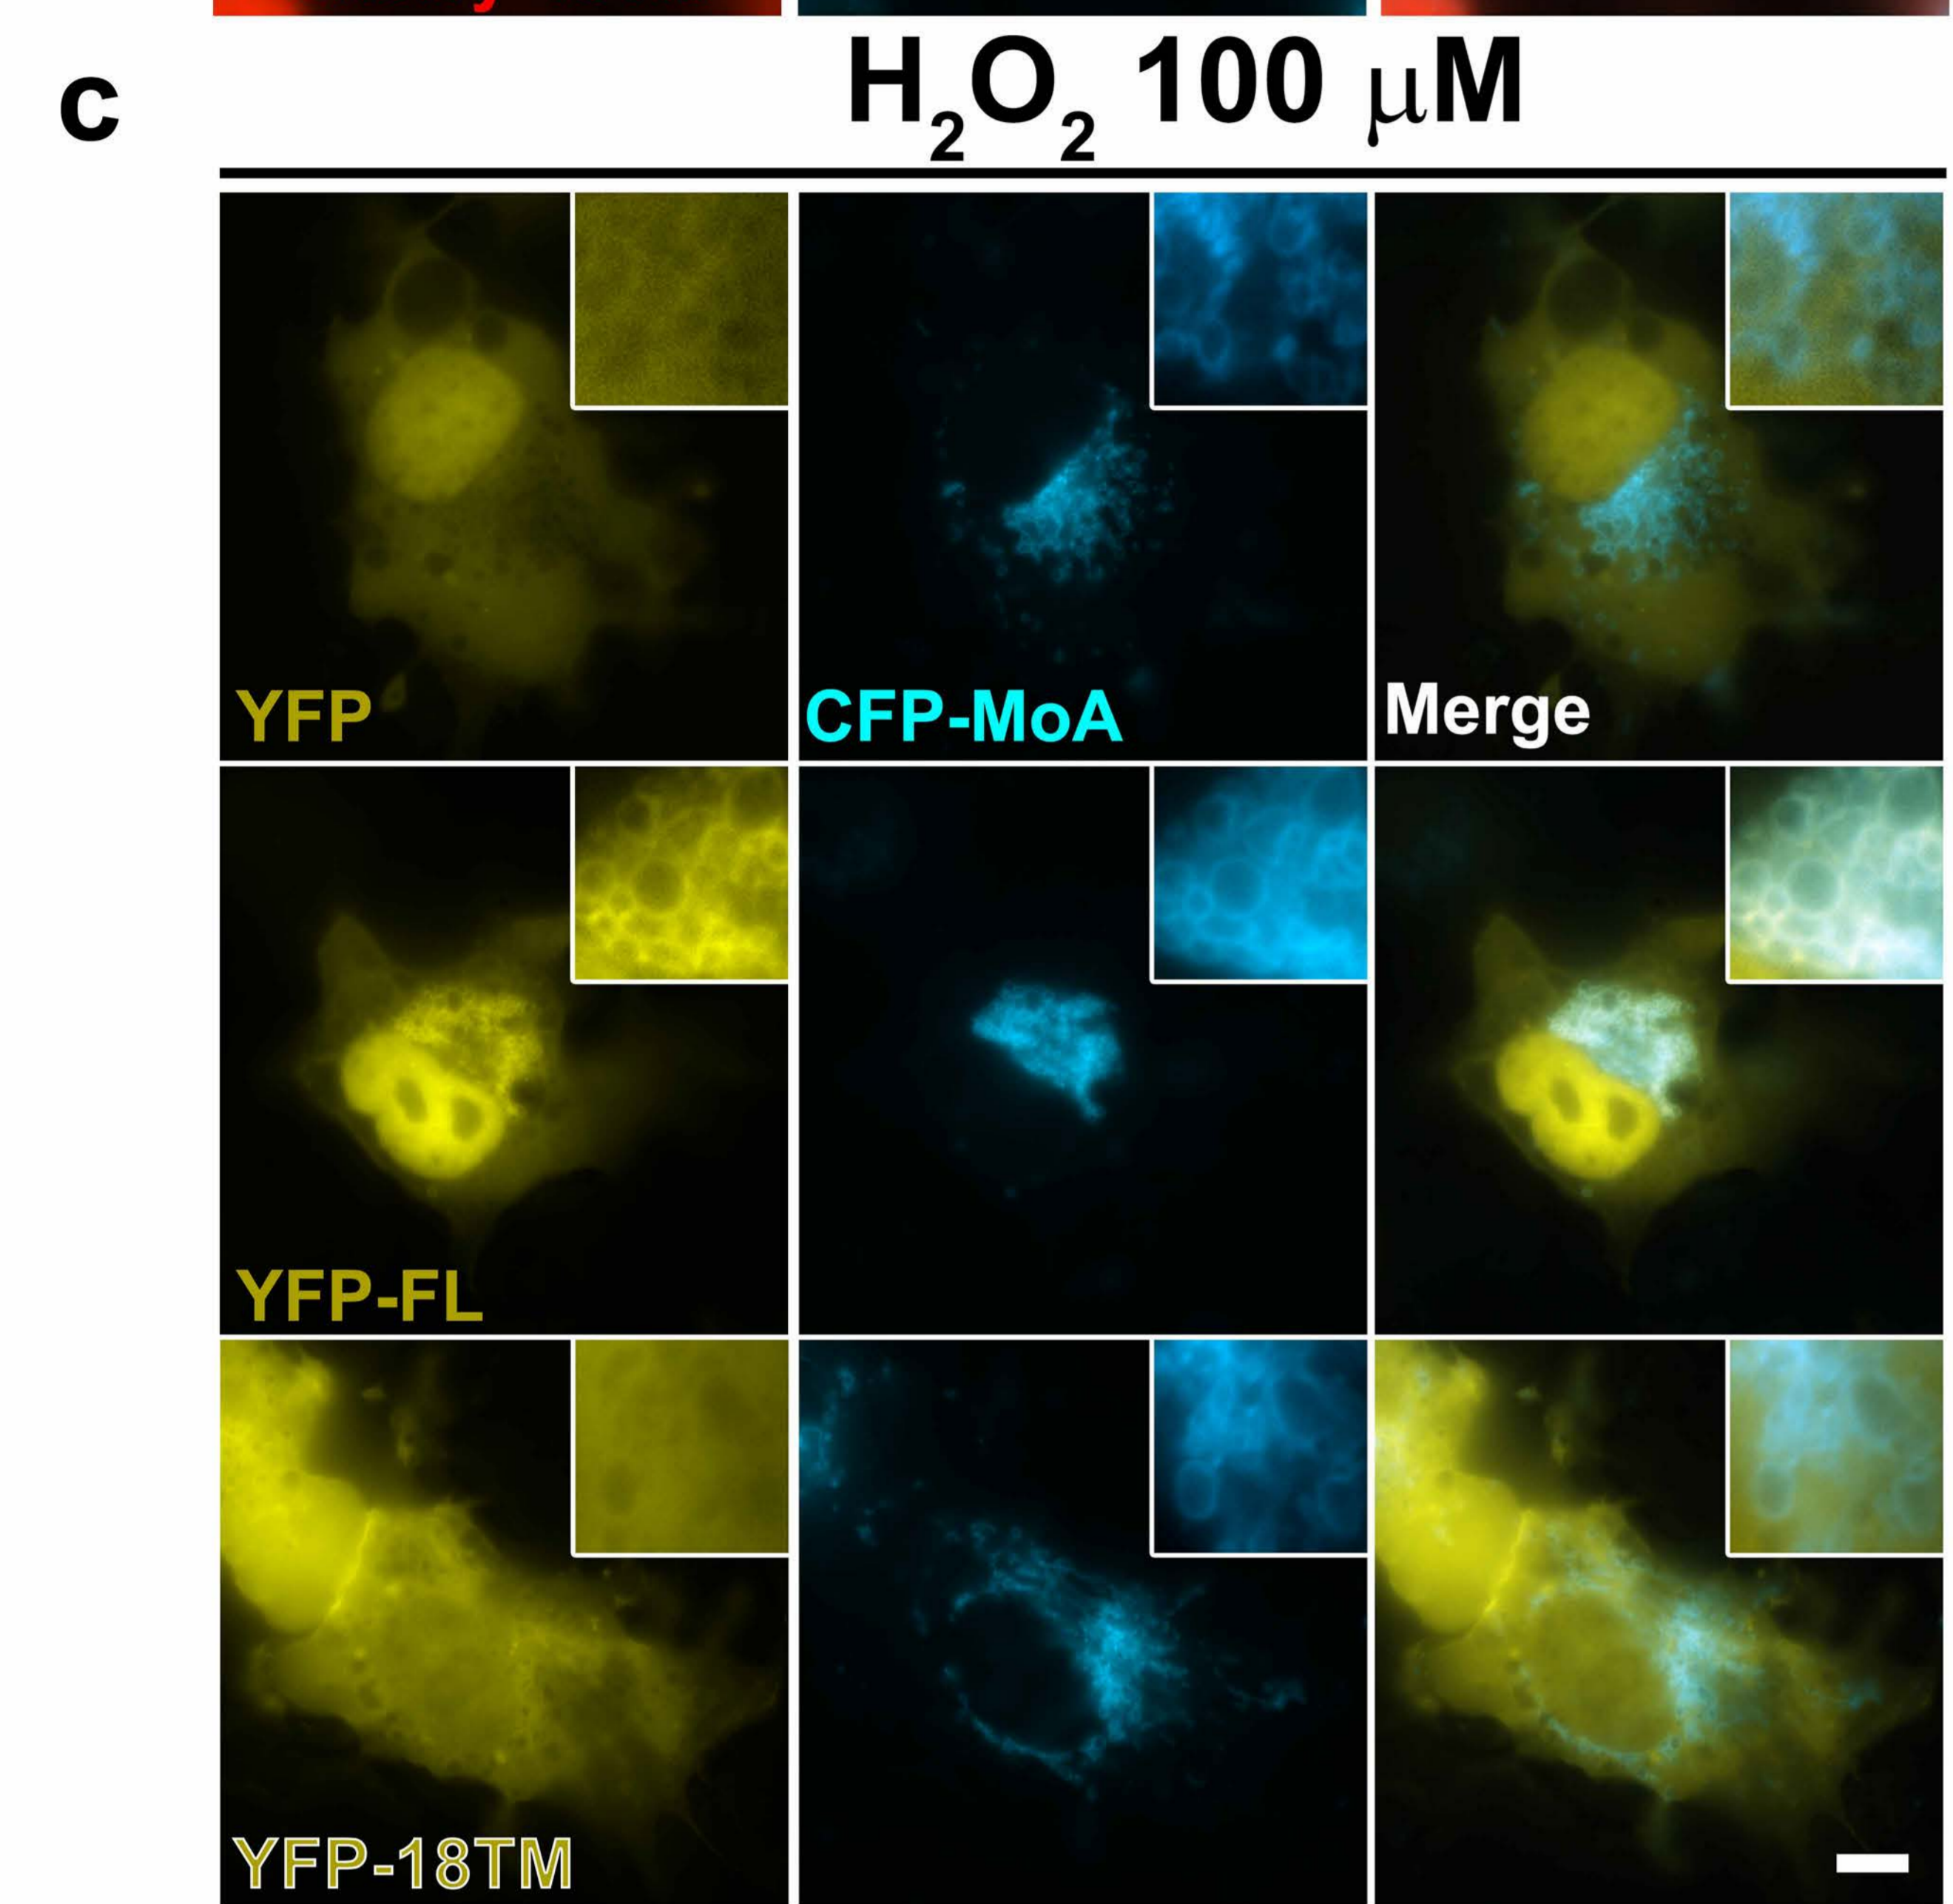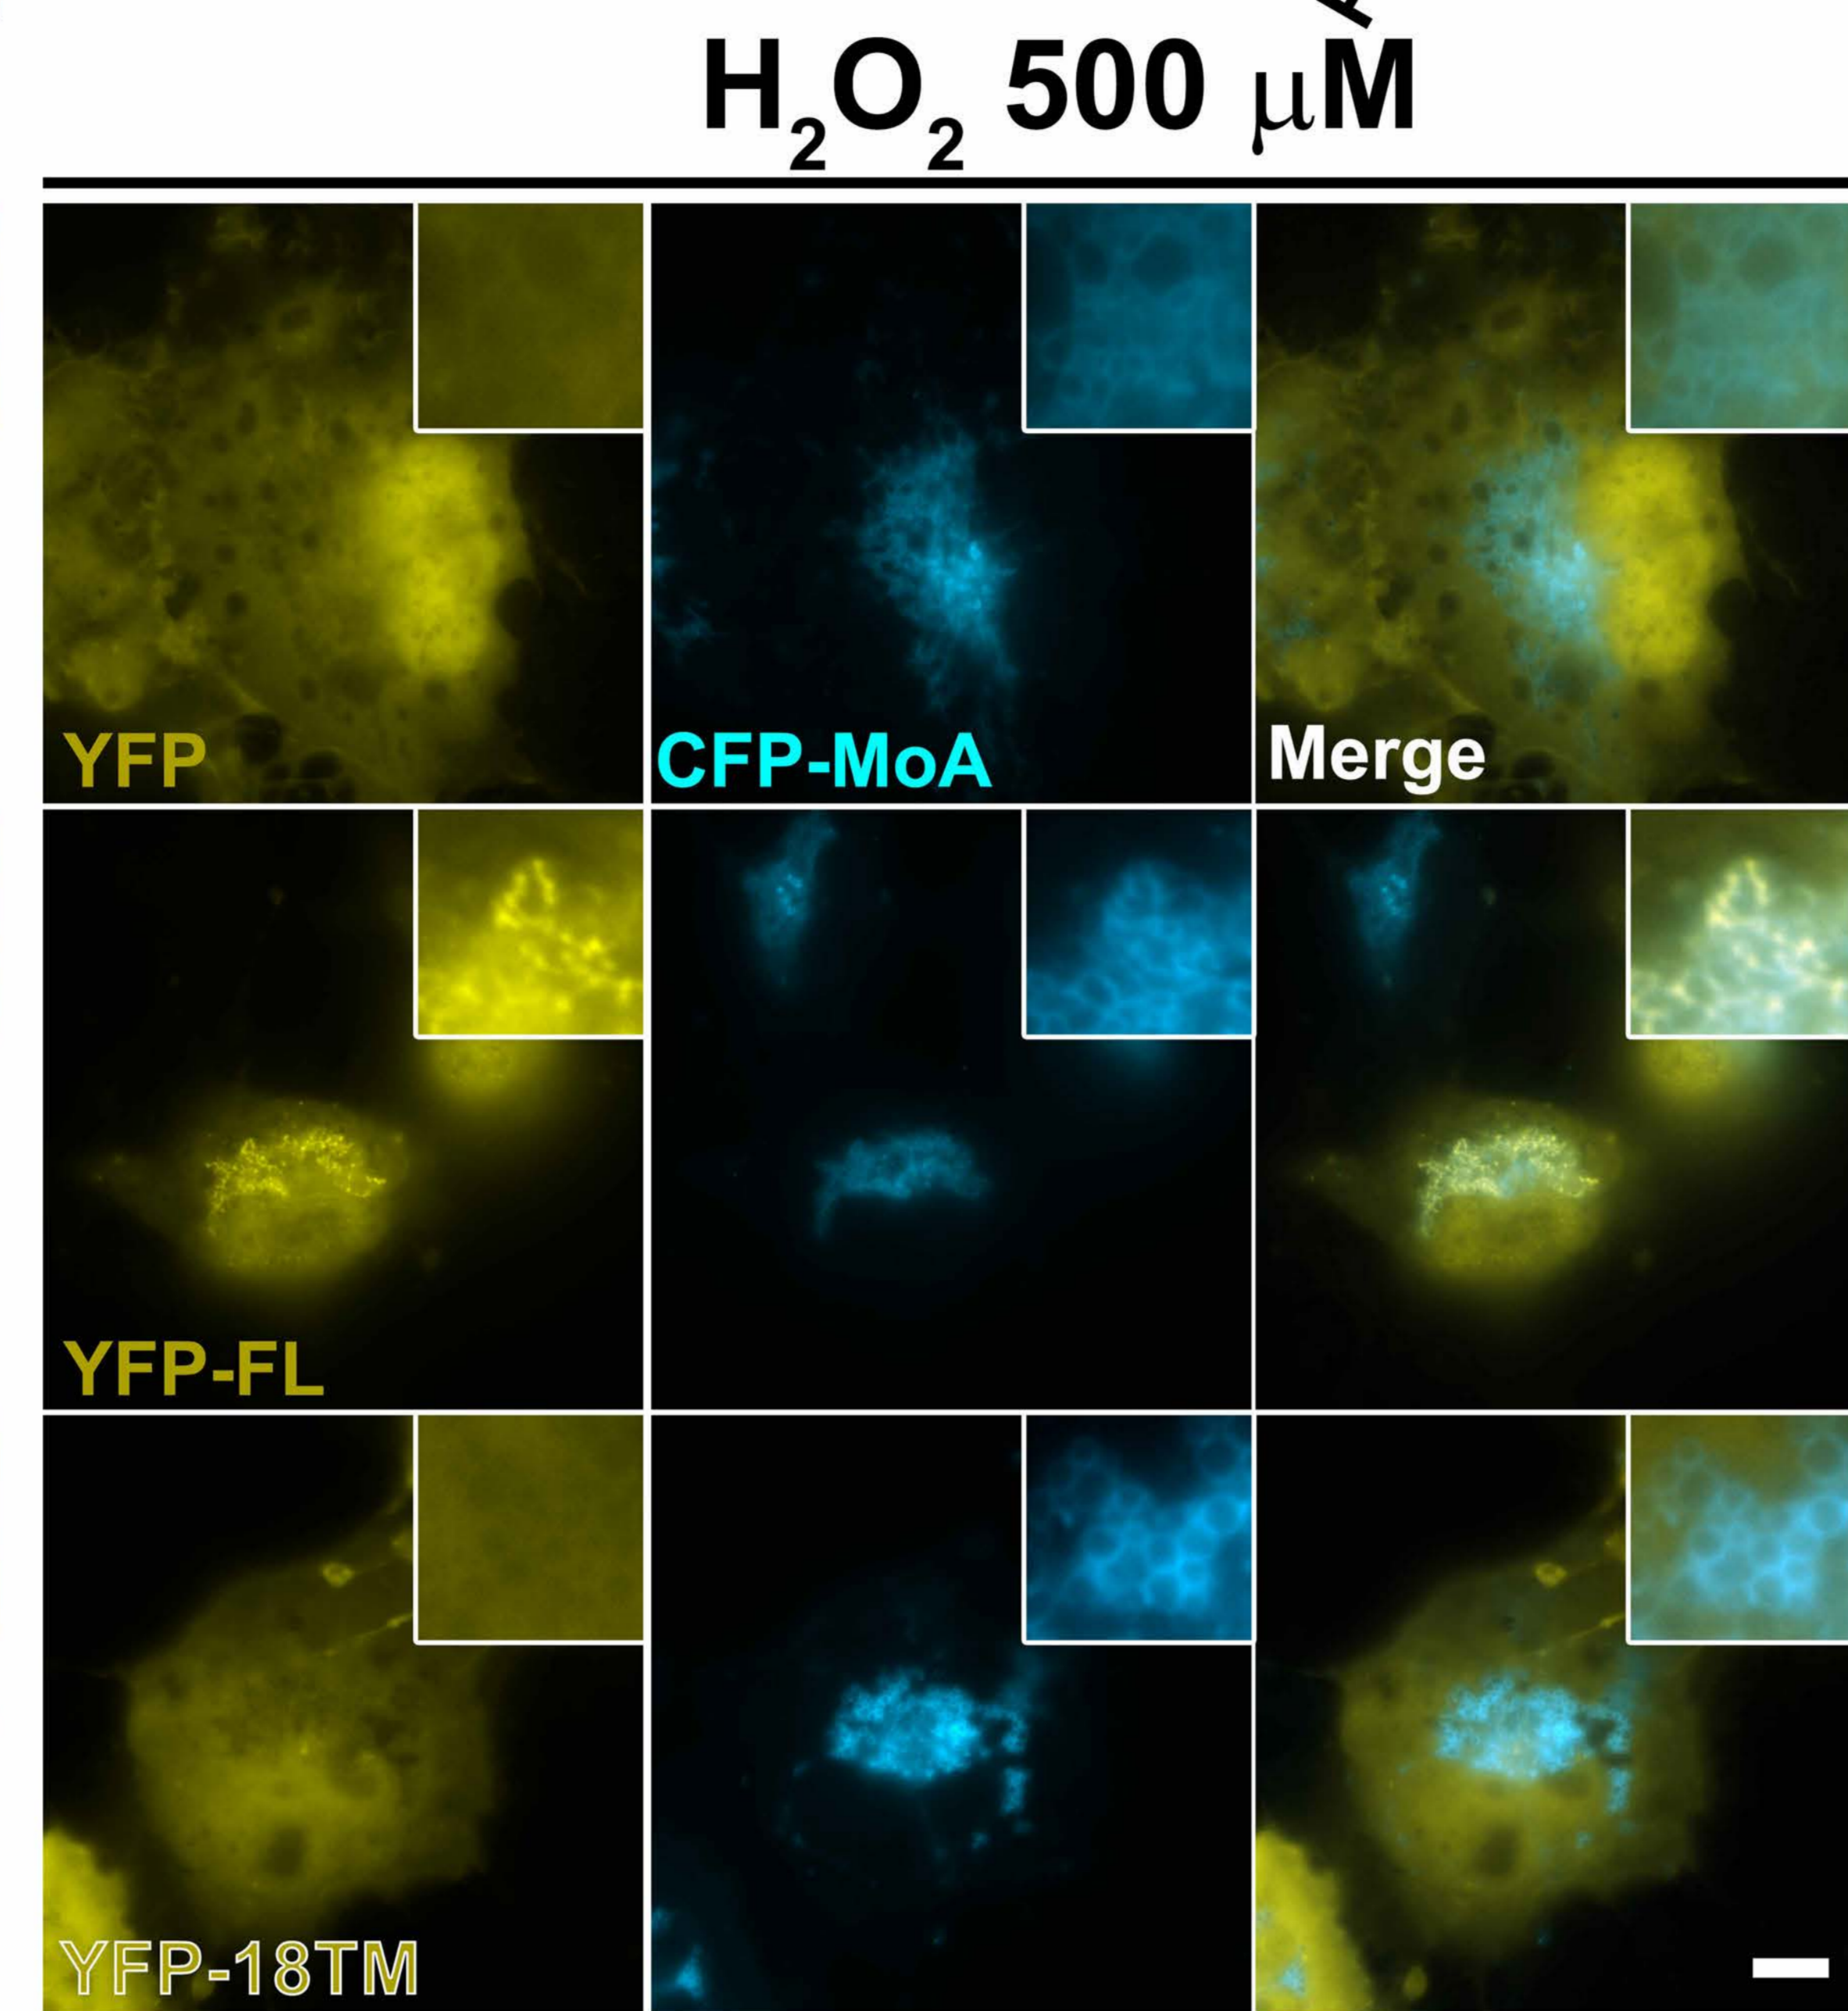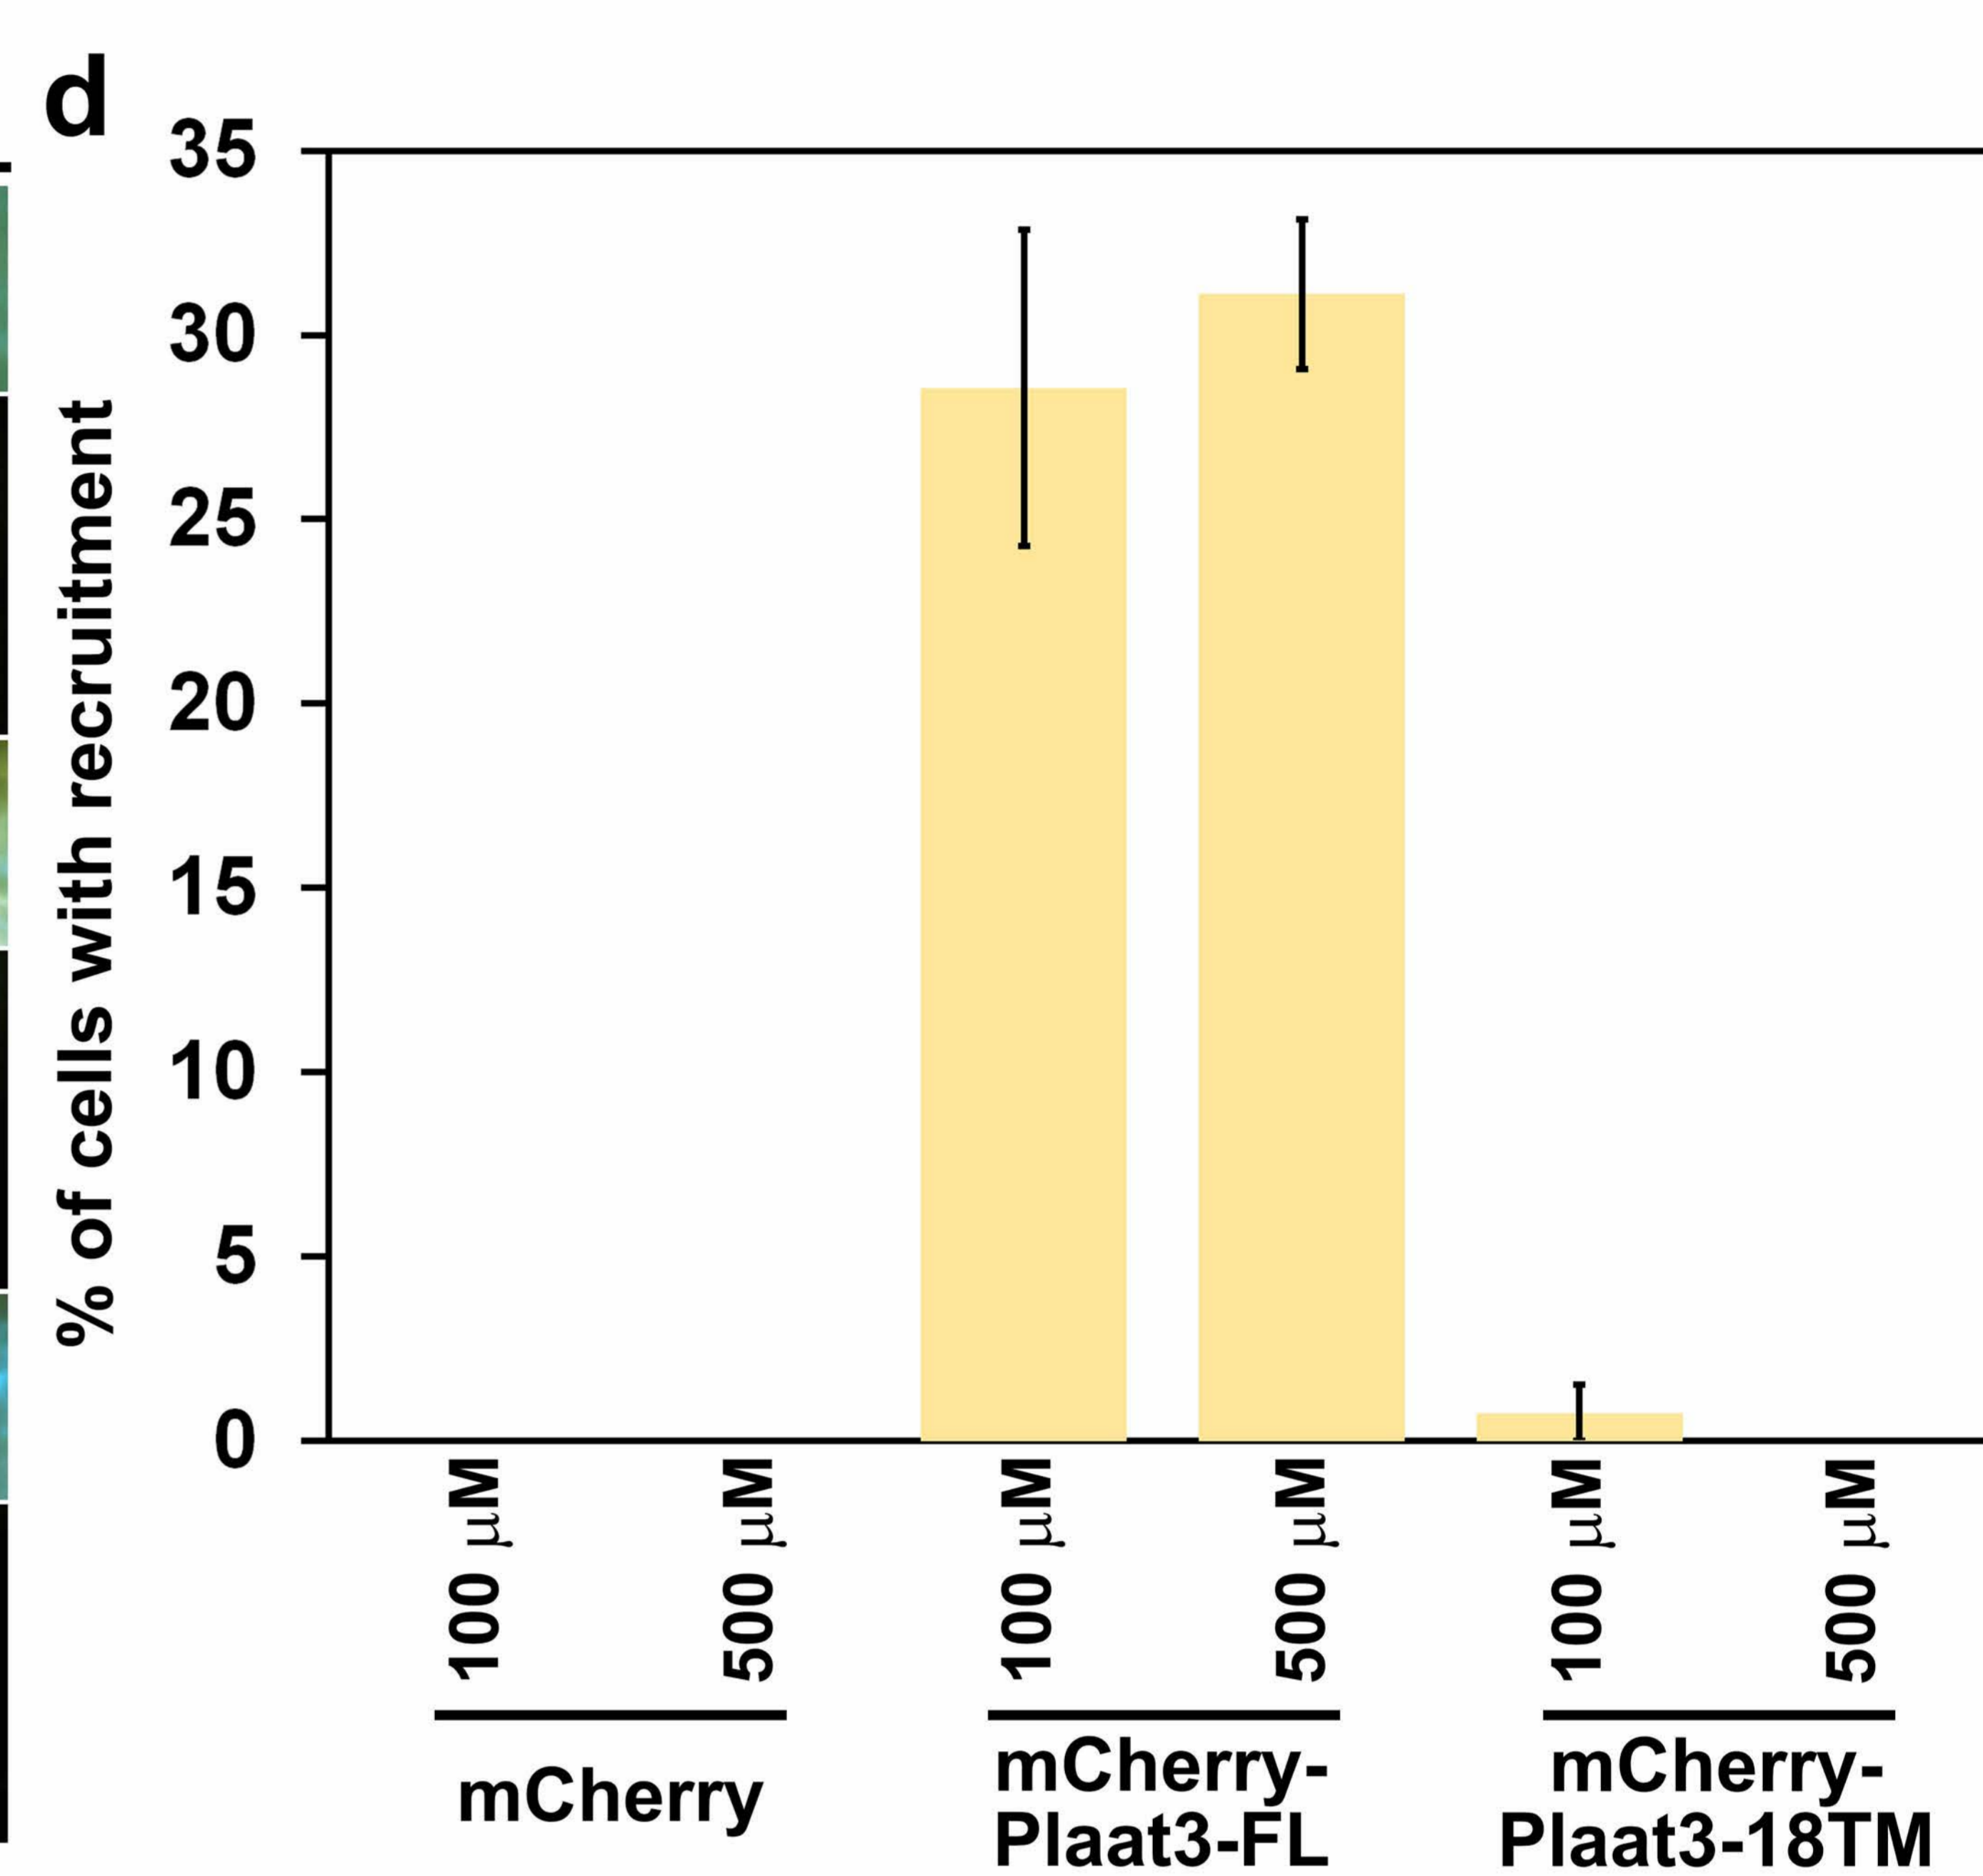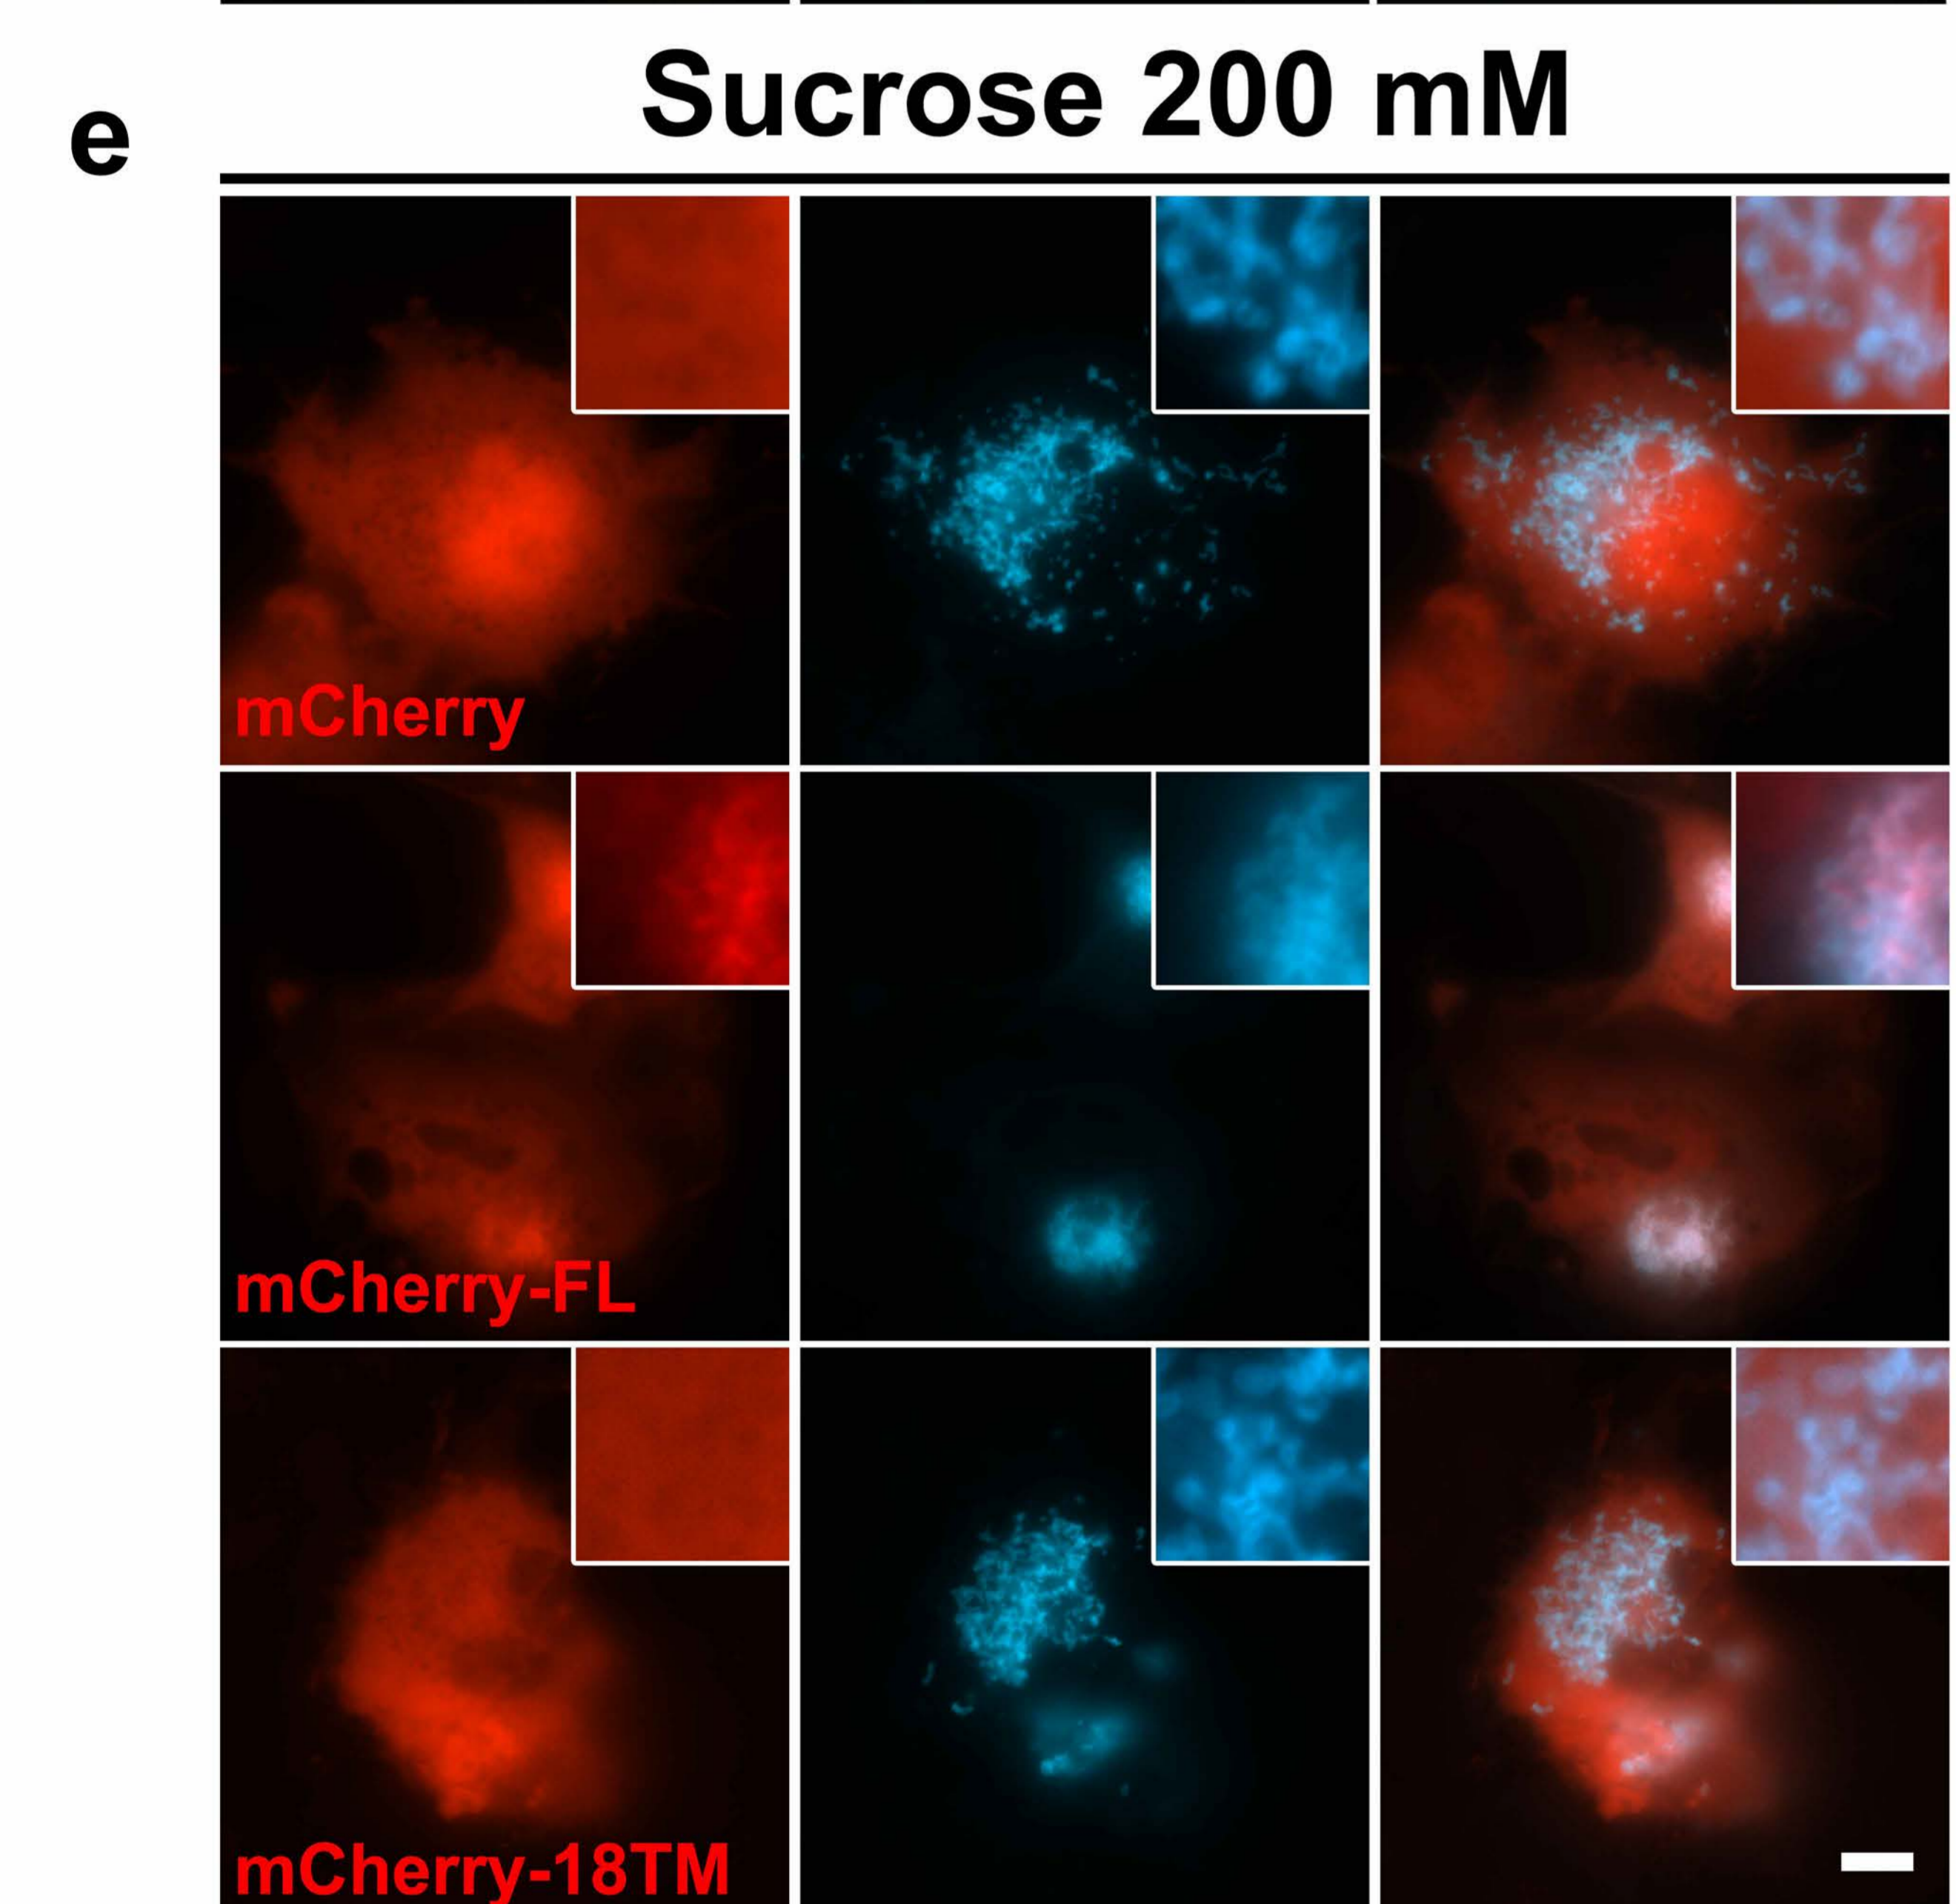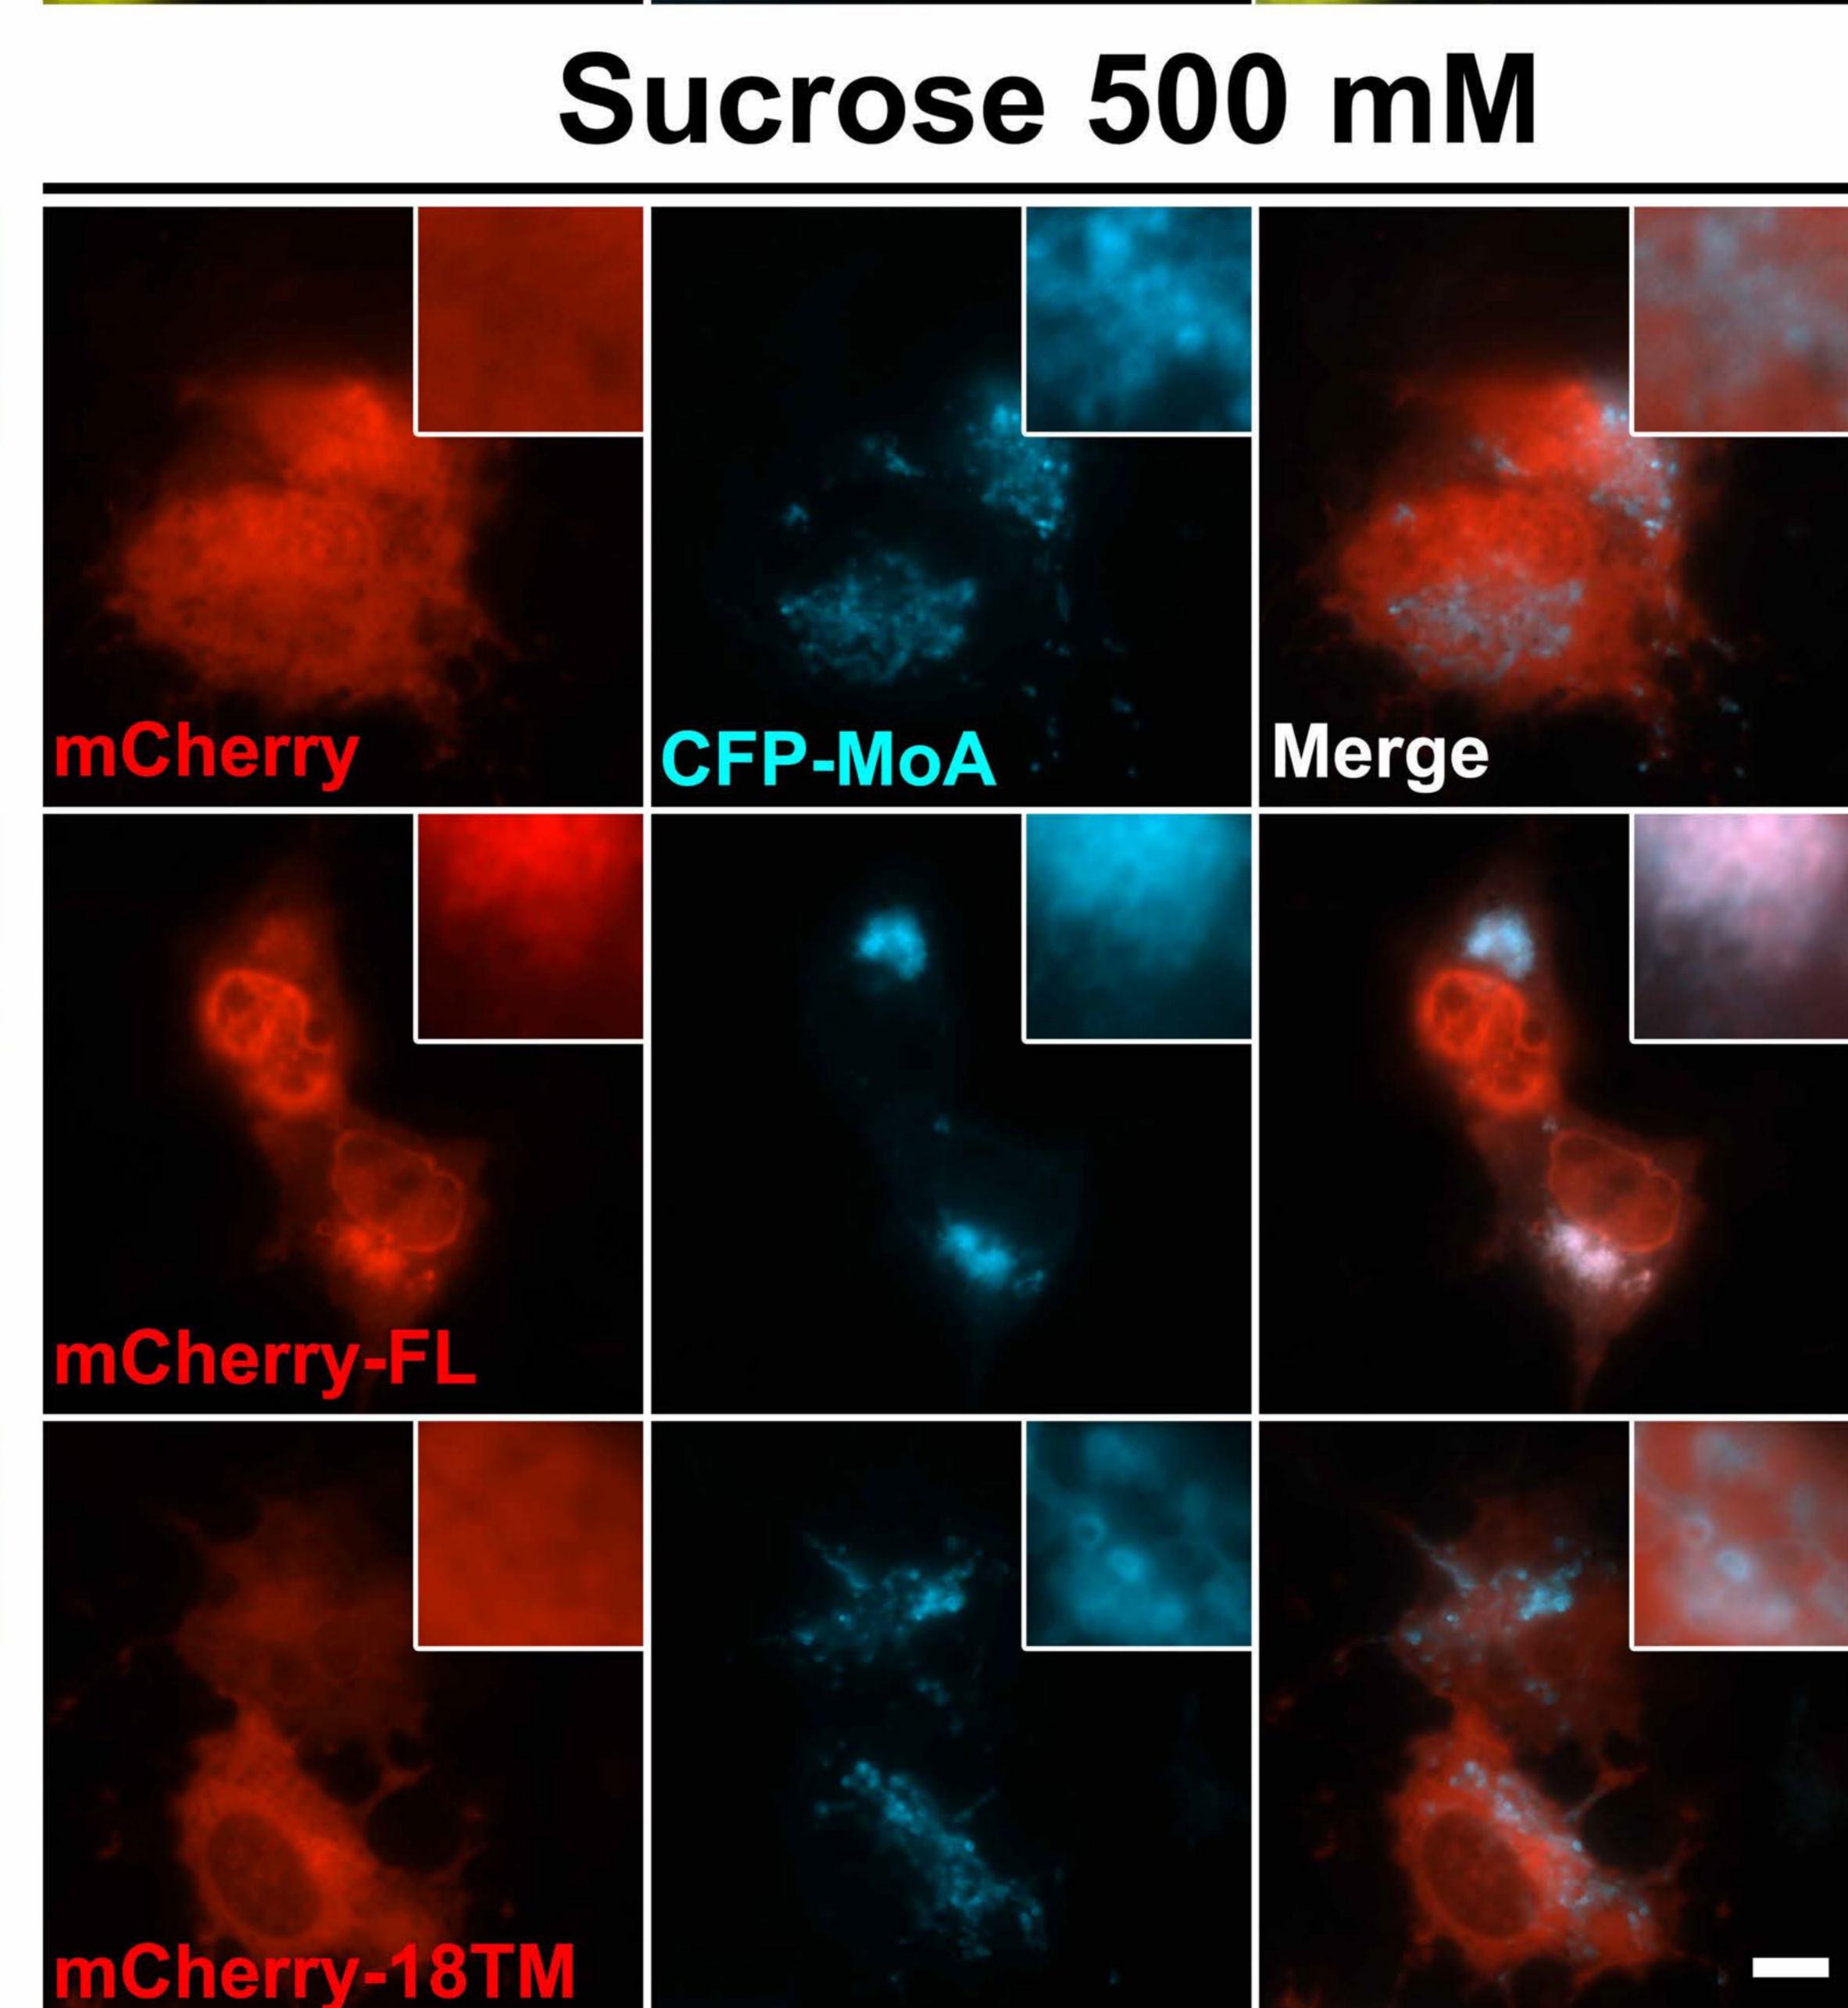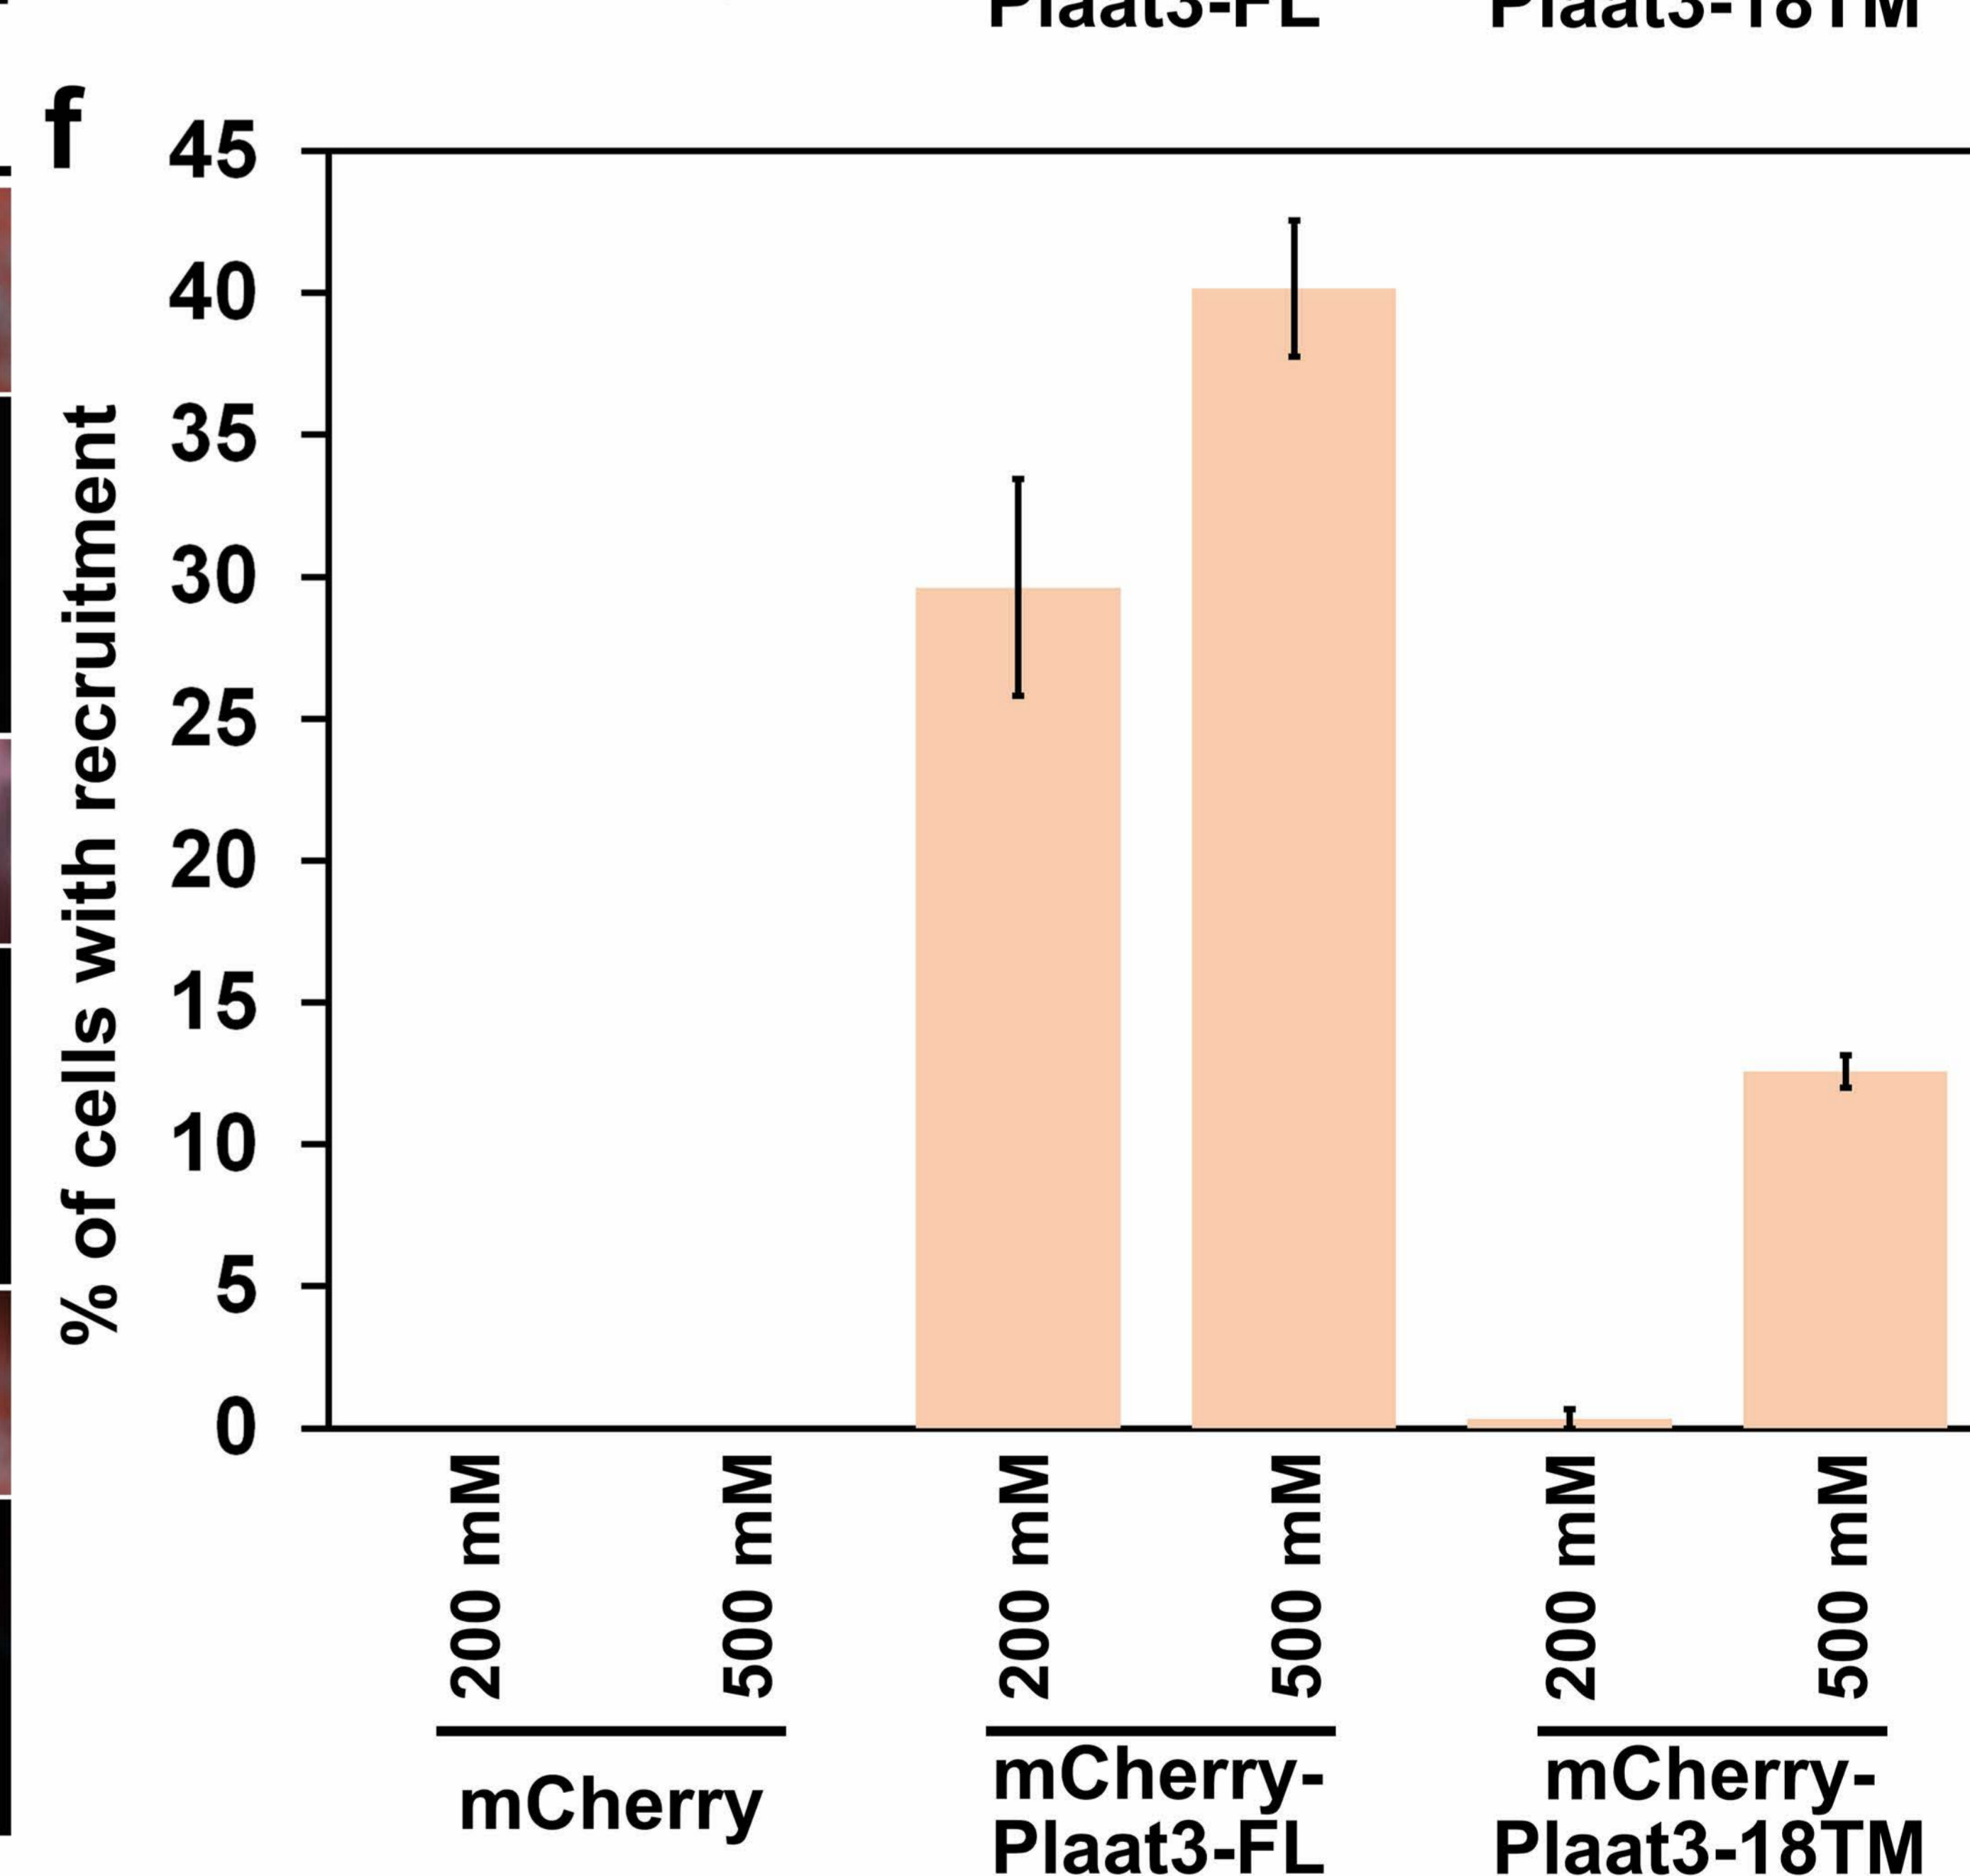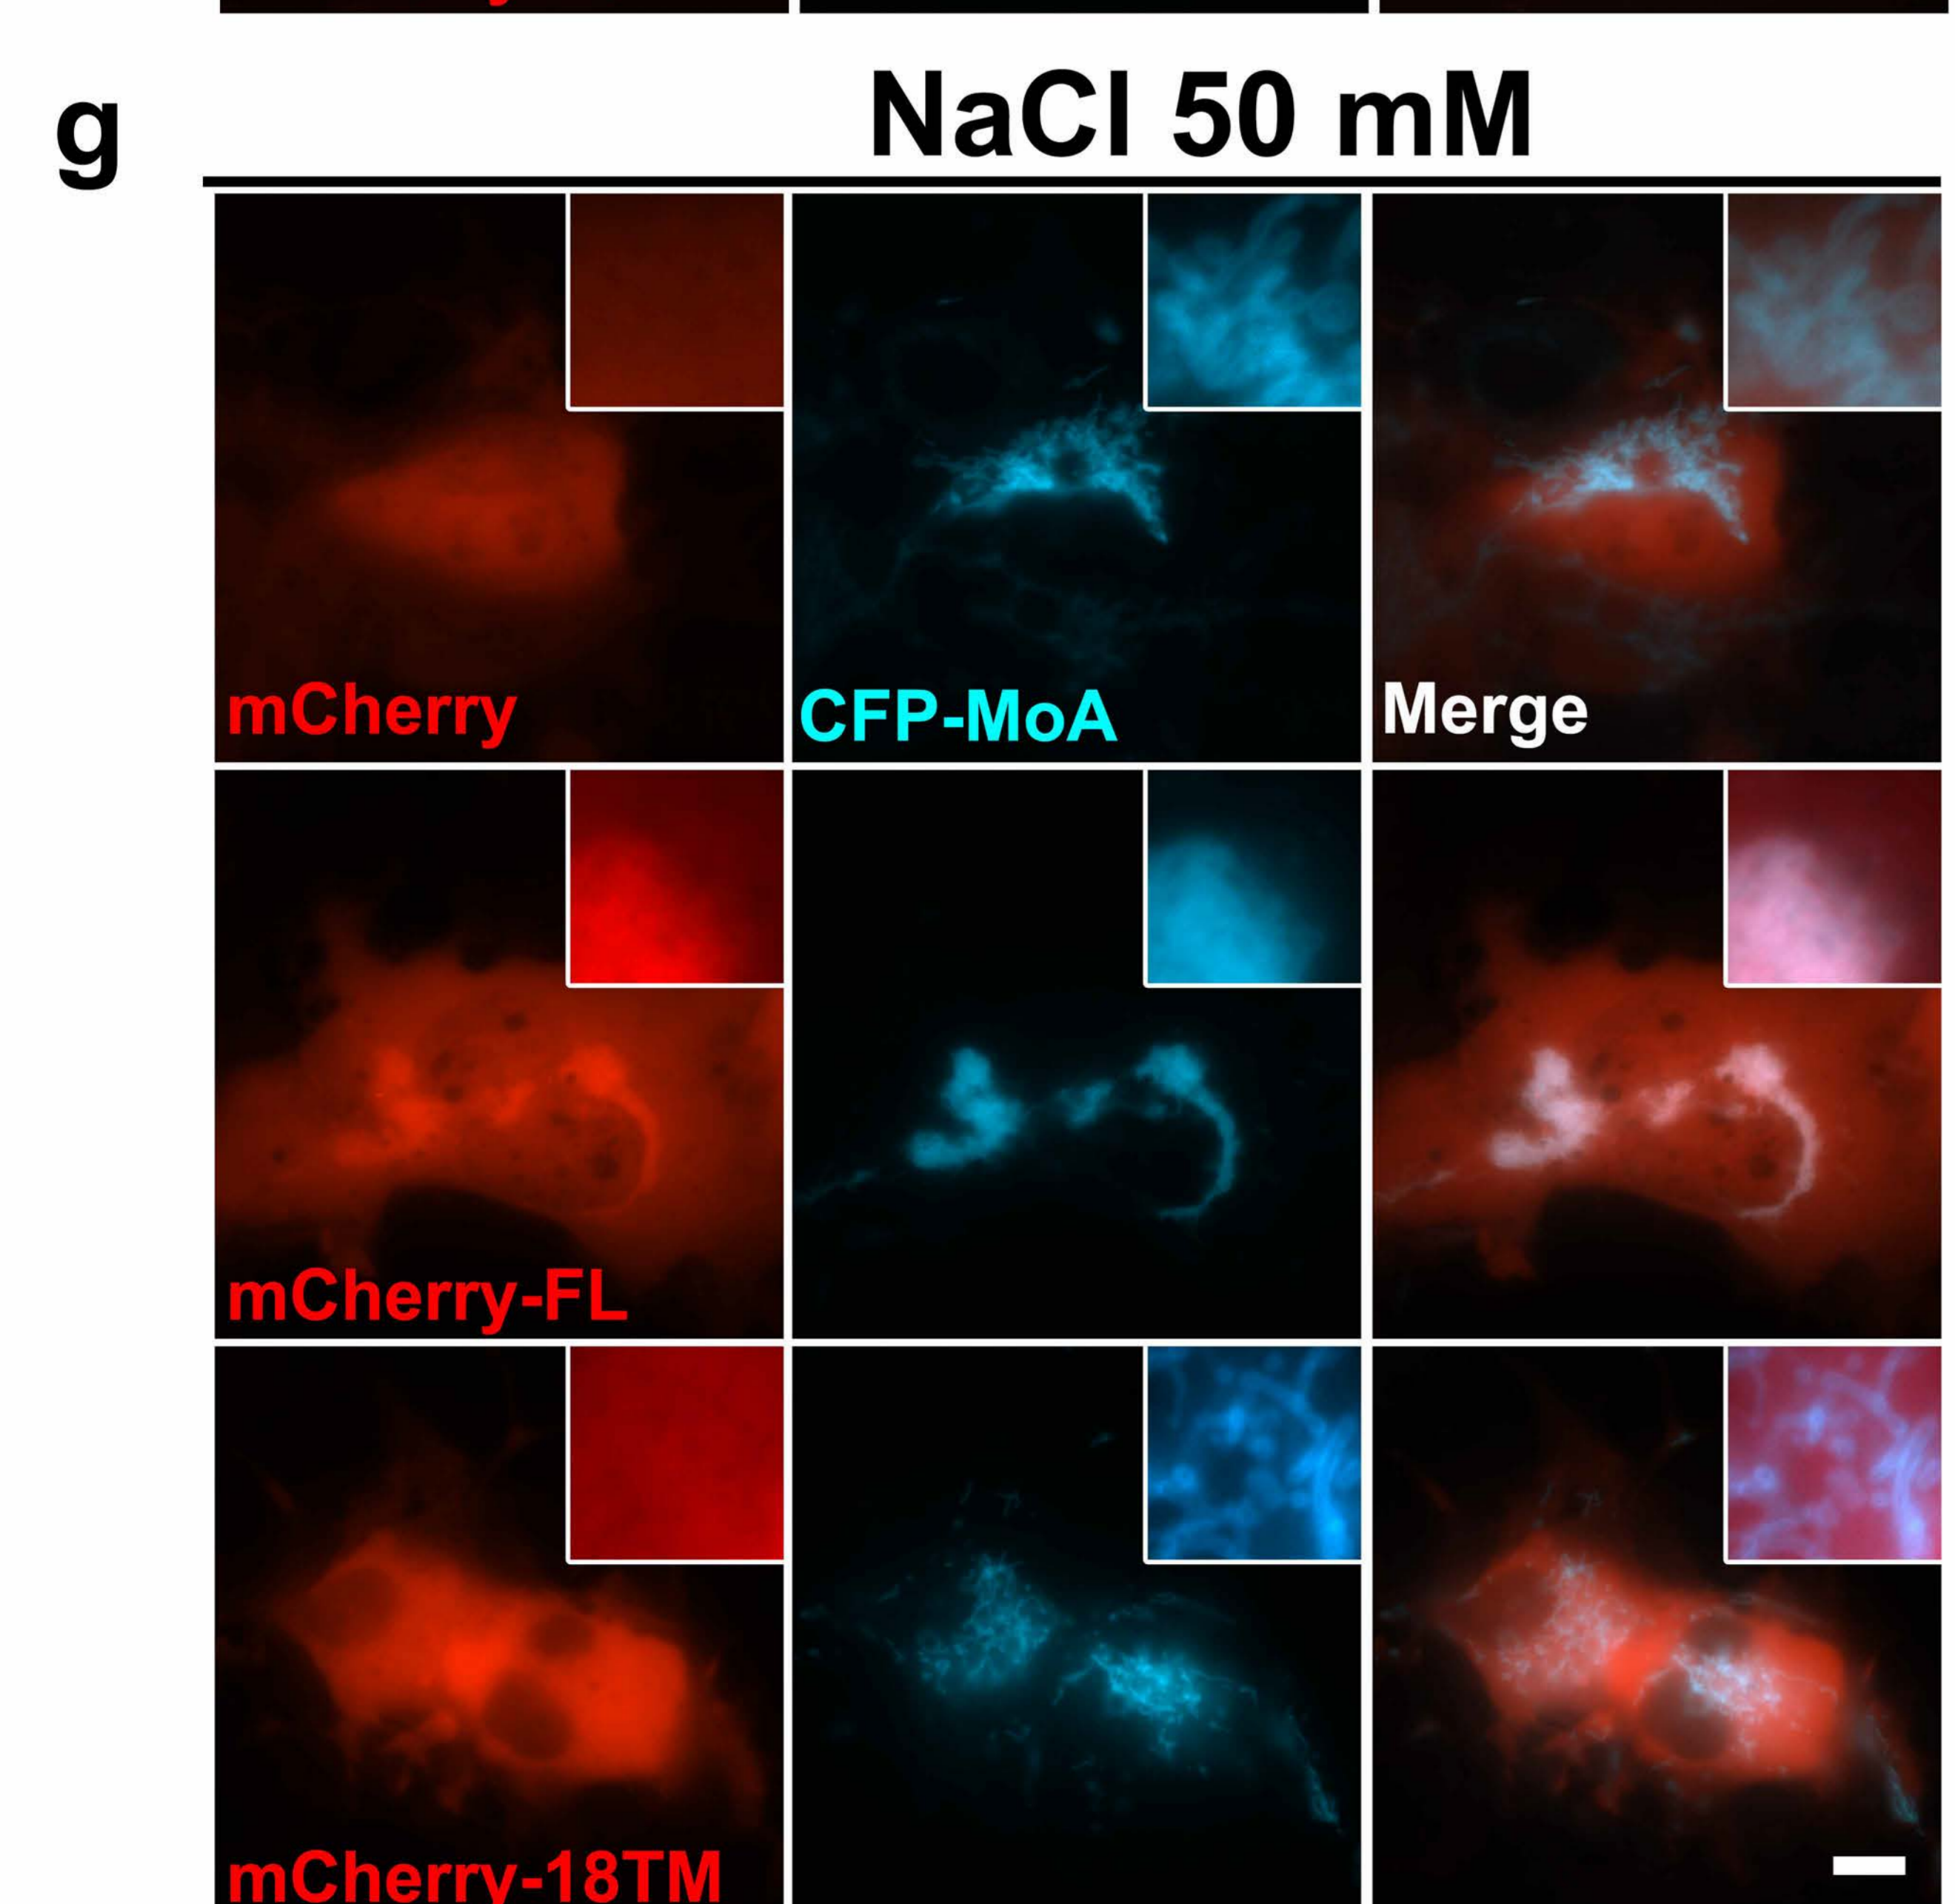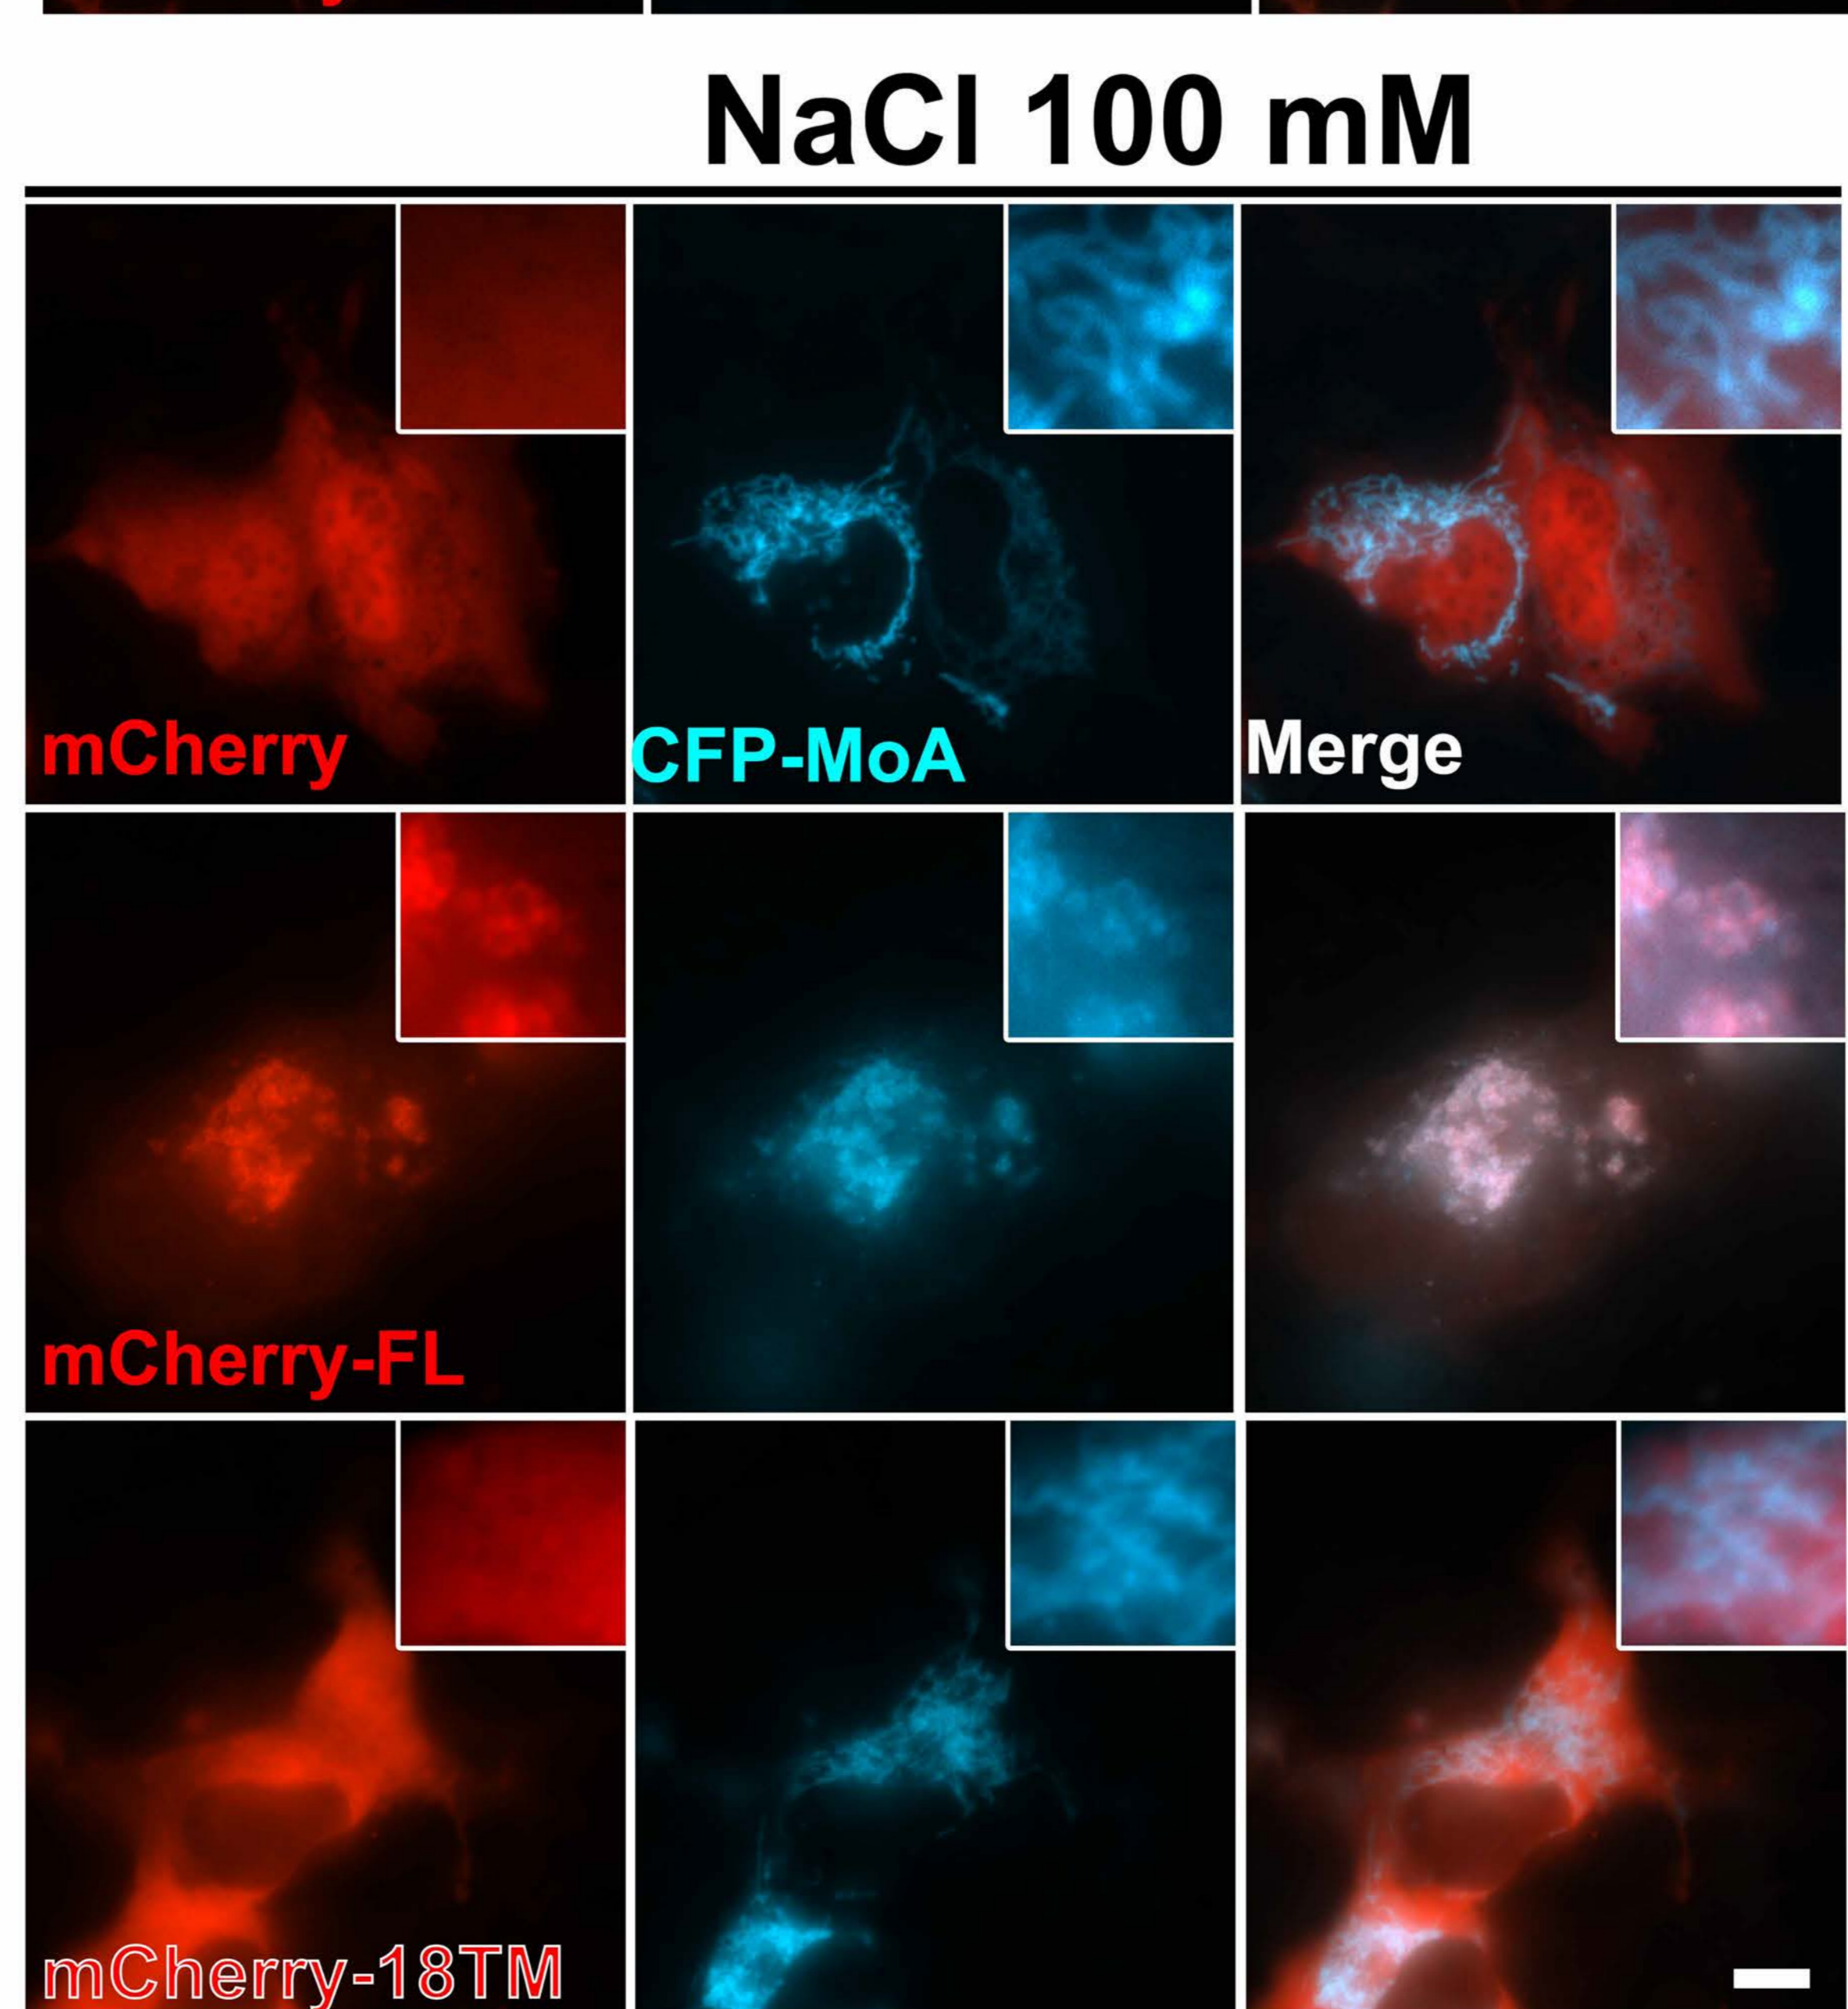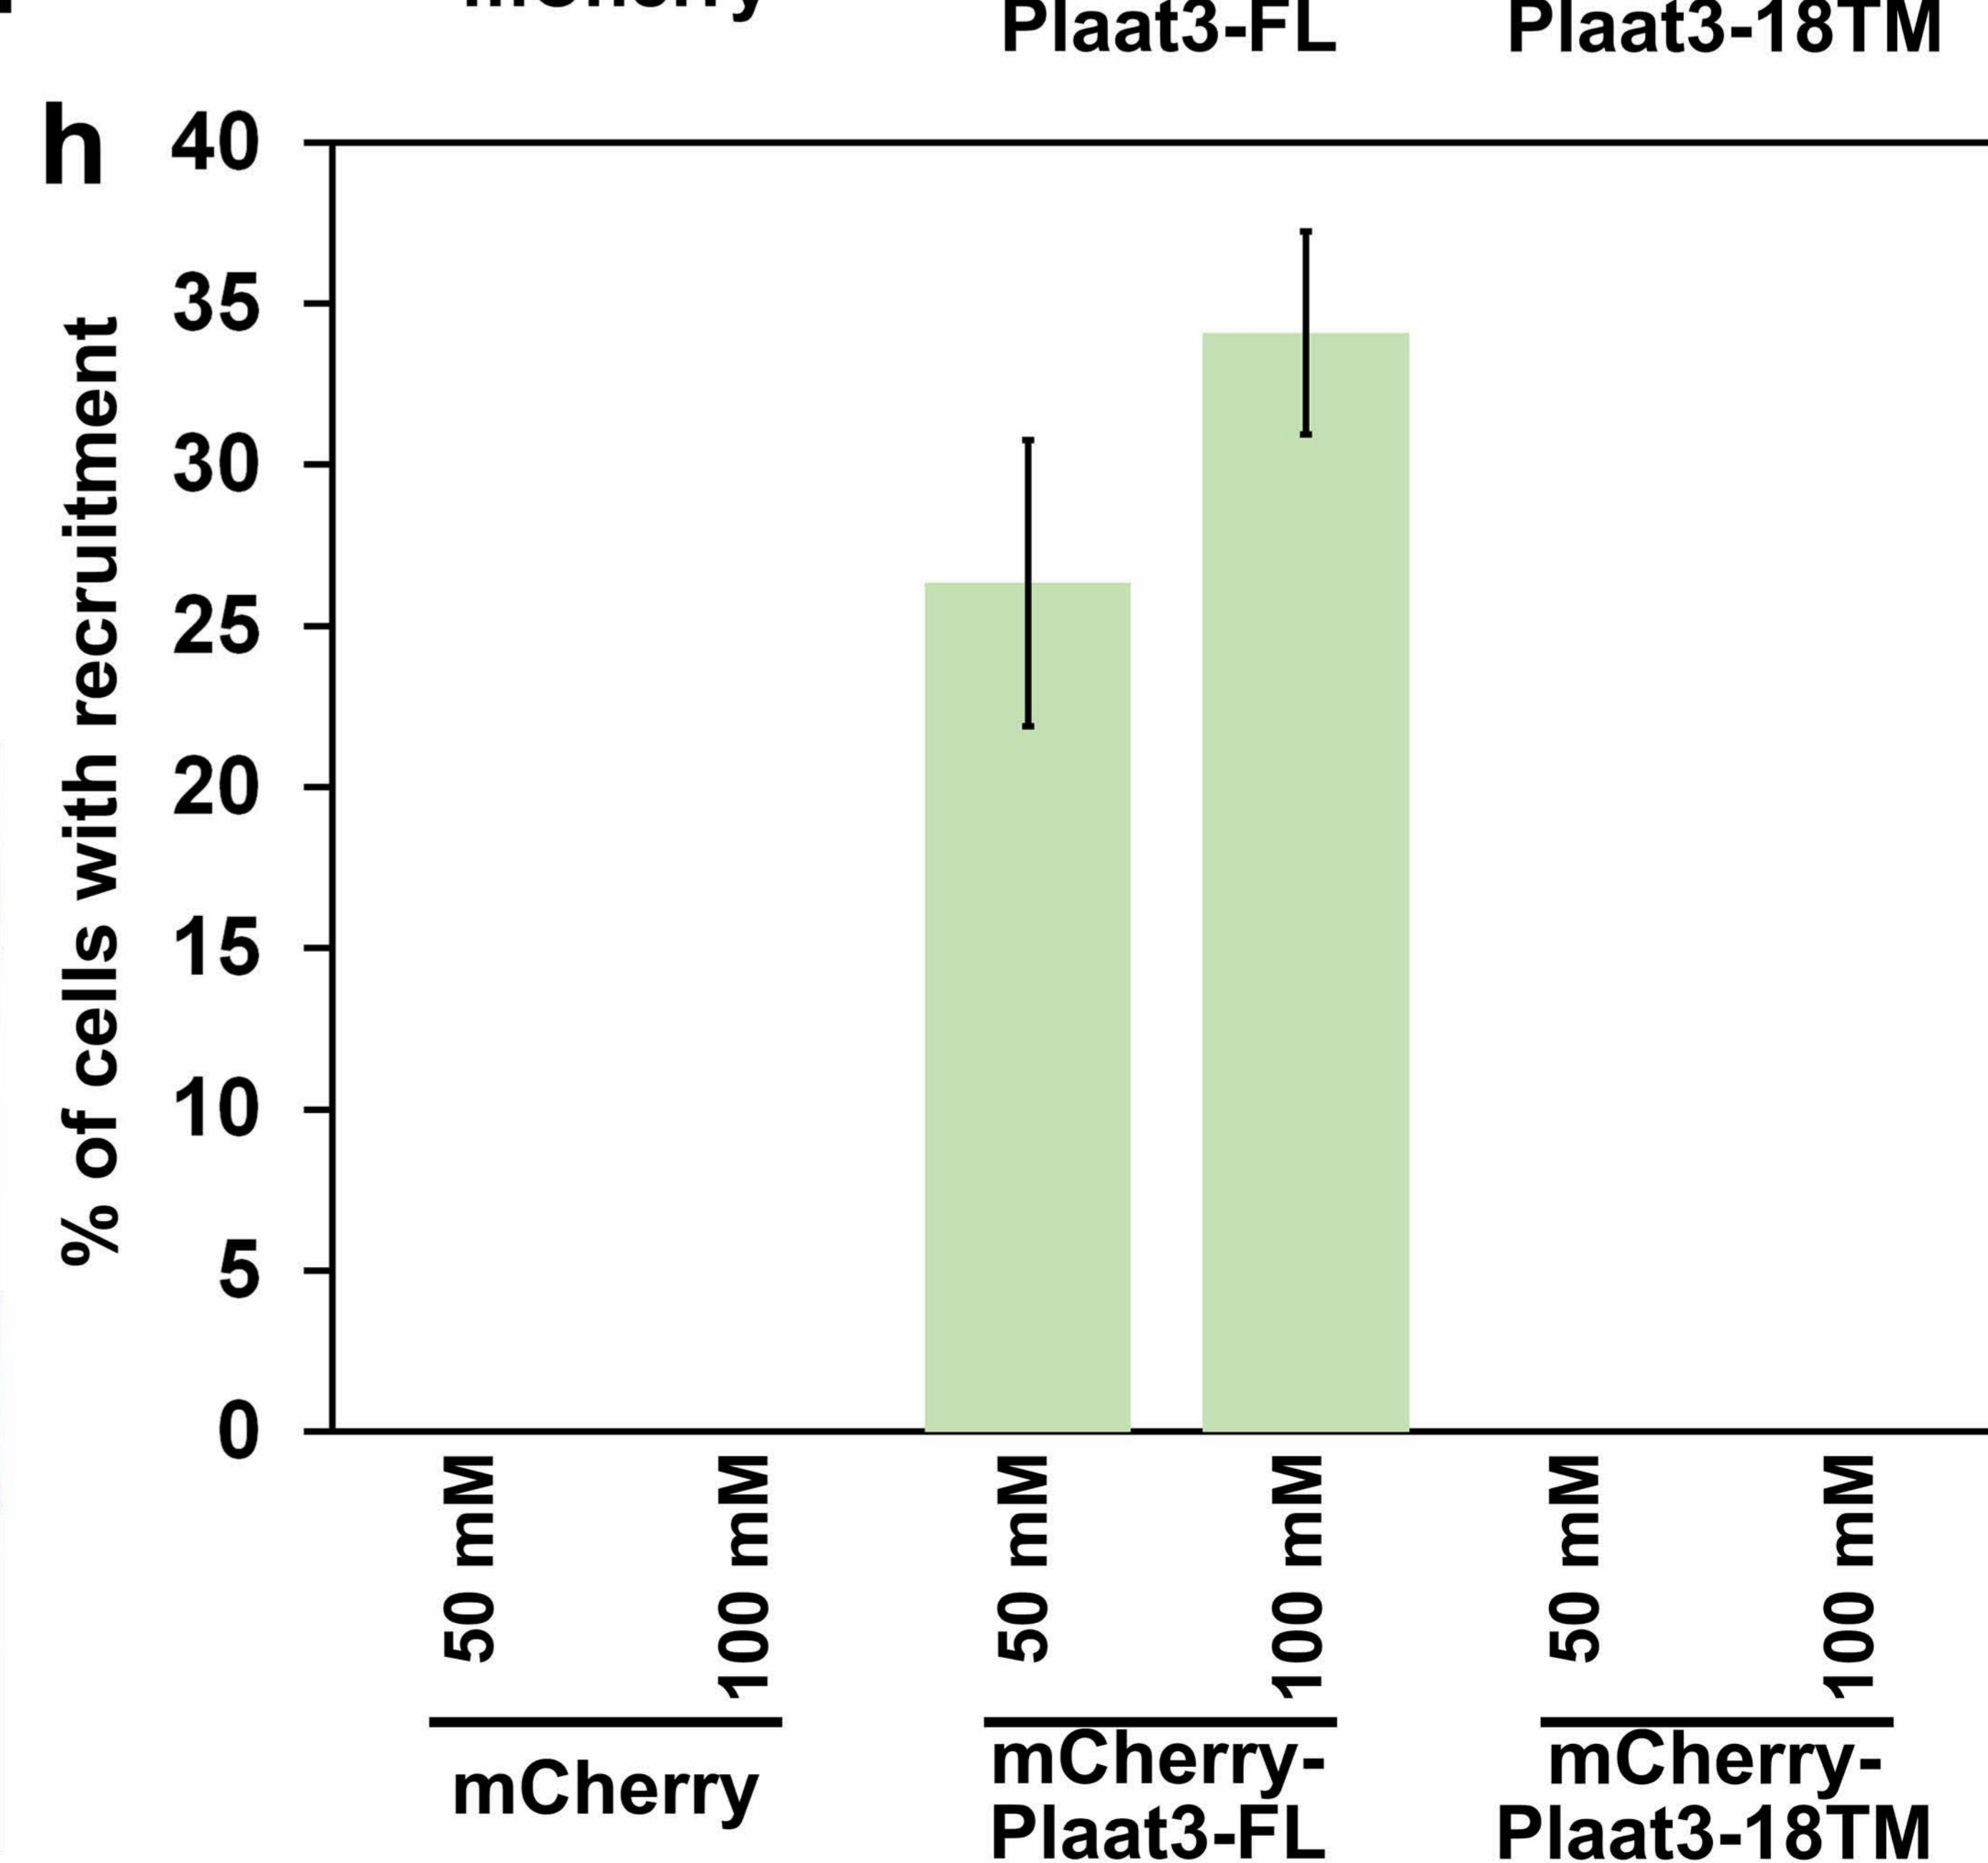

# Supplementary Figure 8

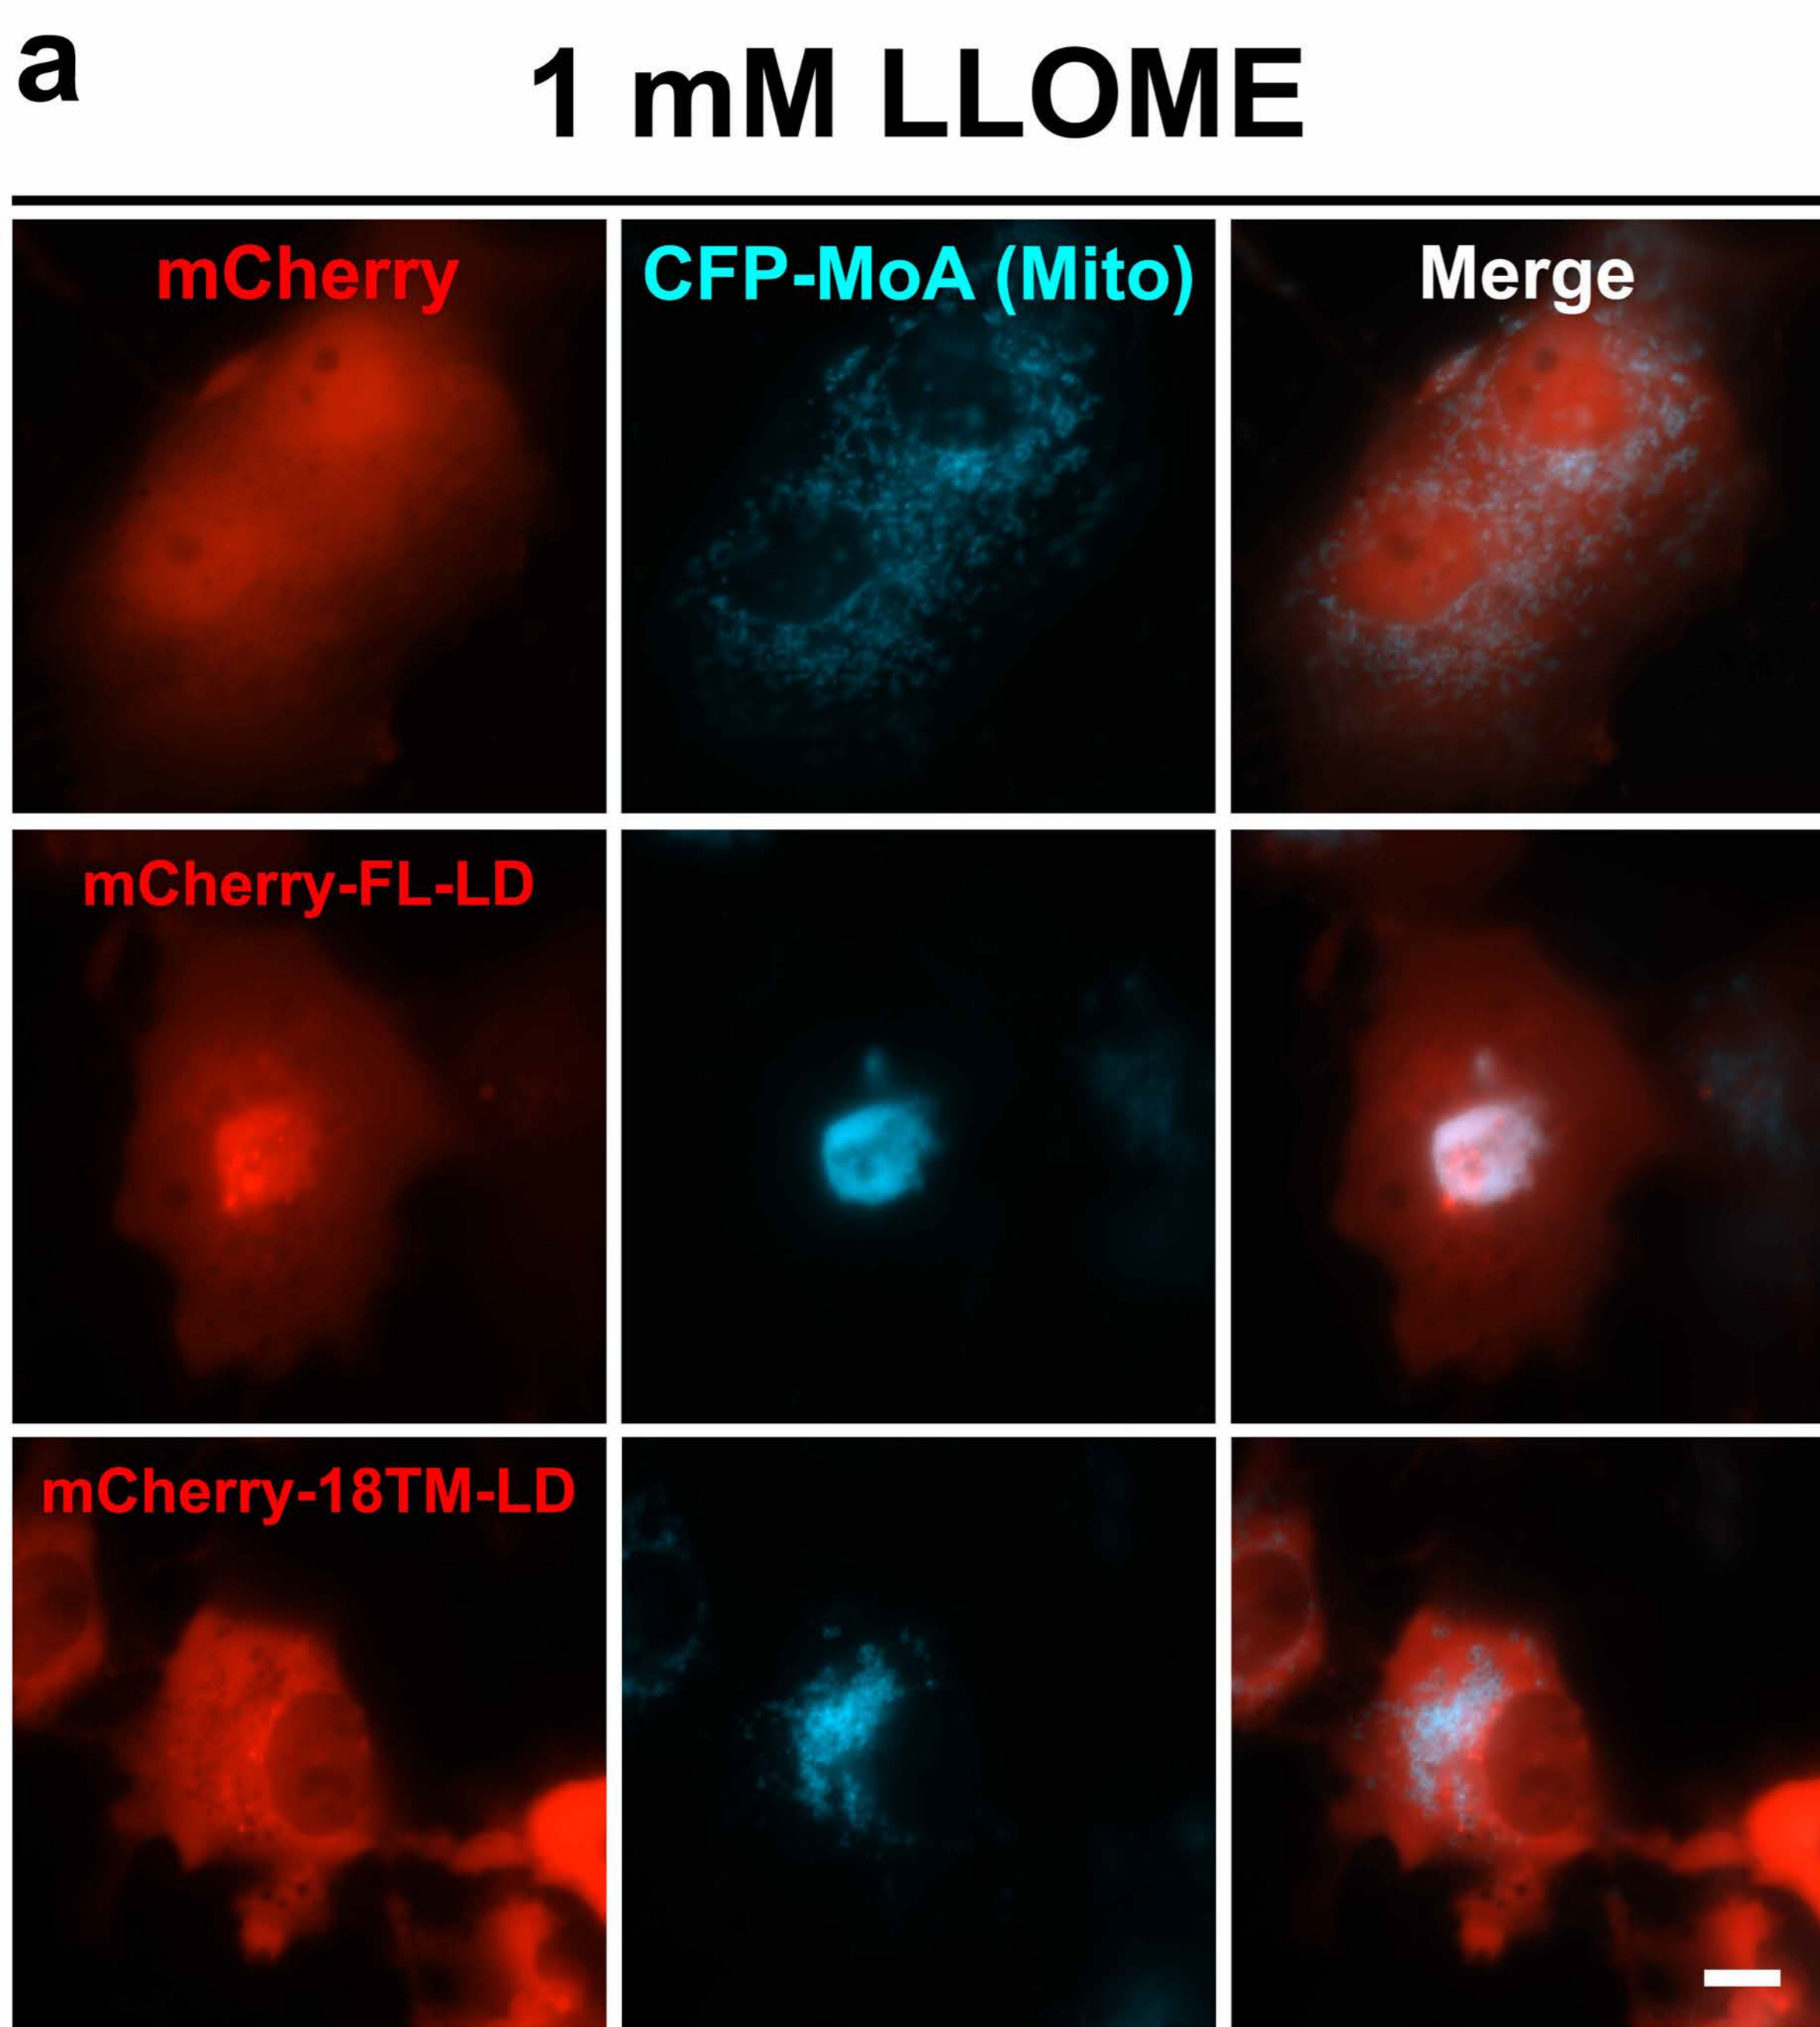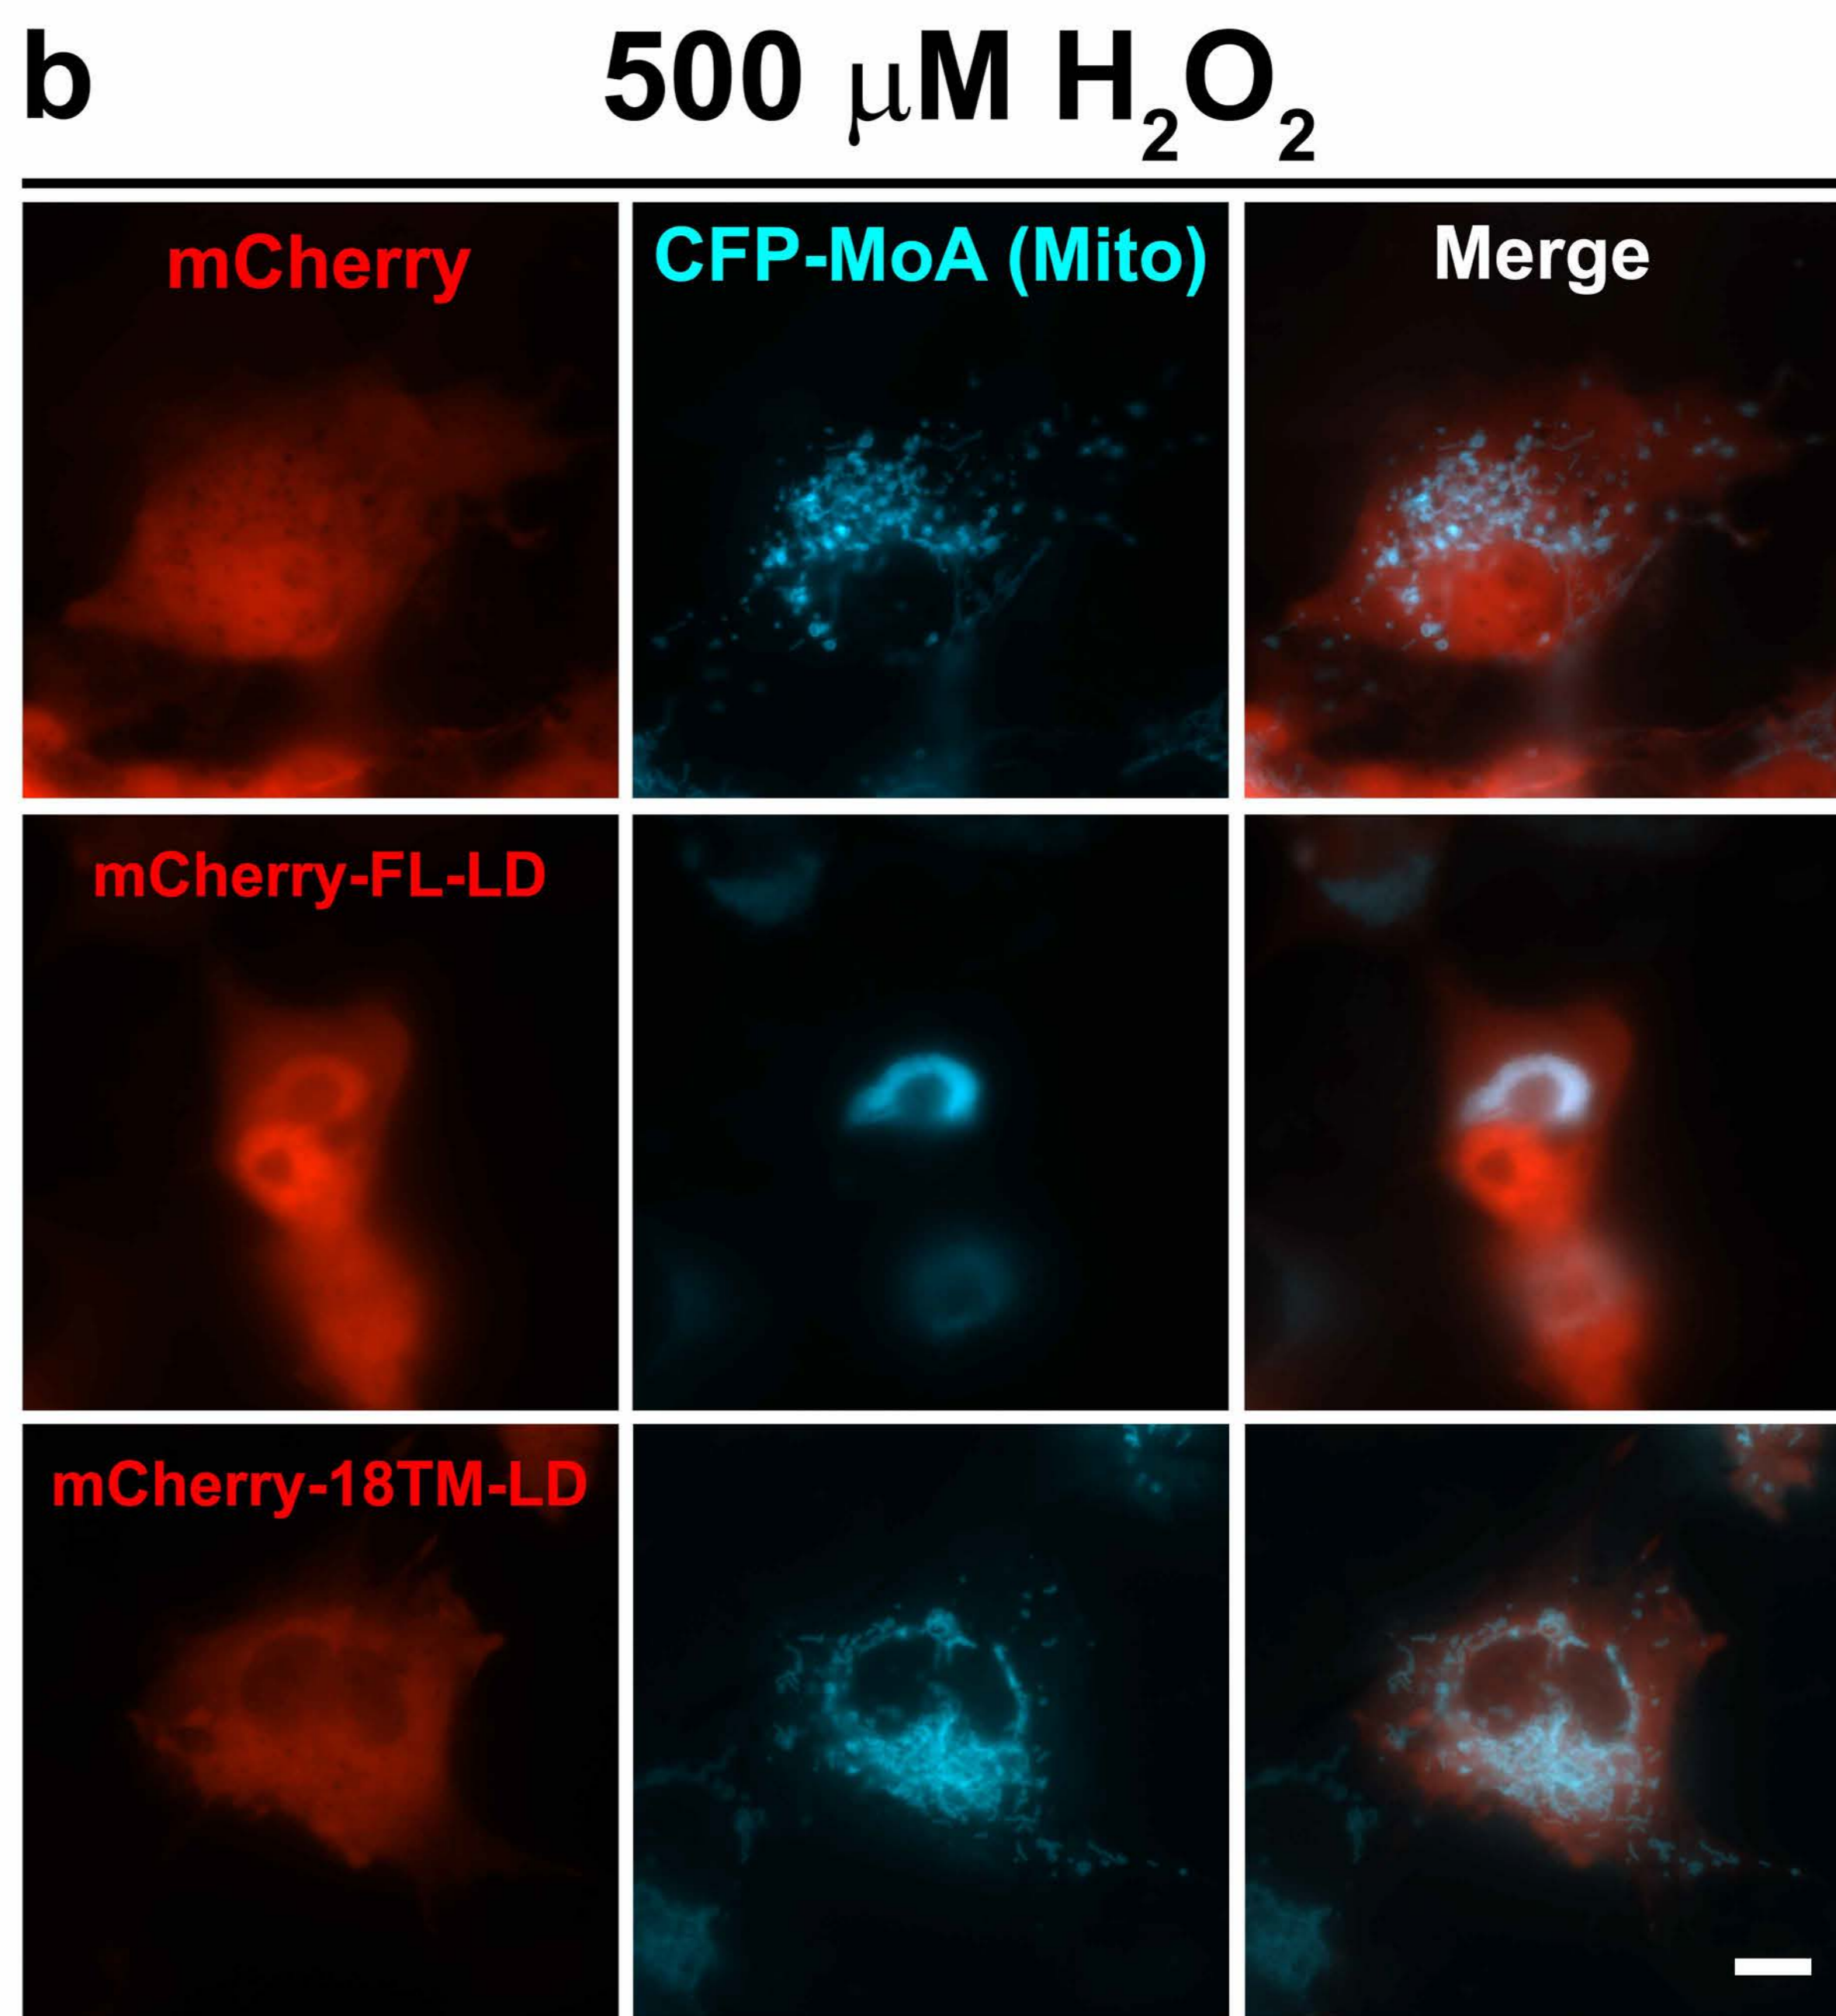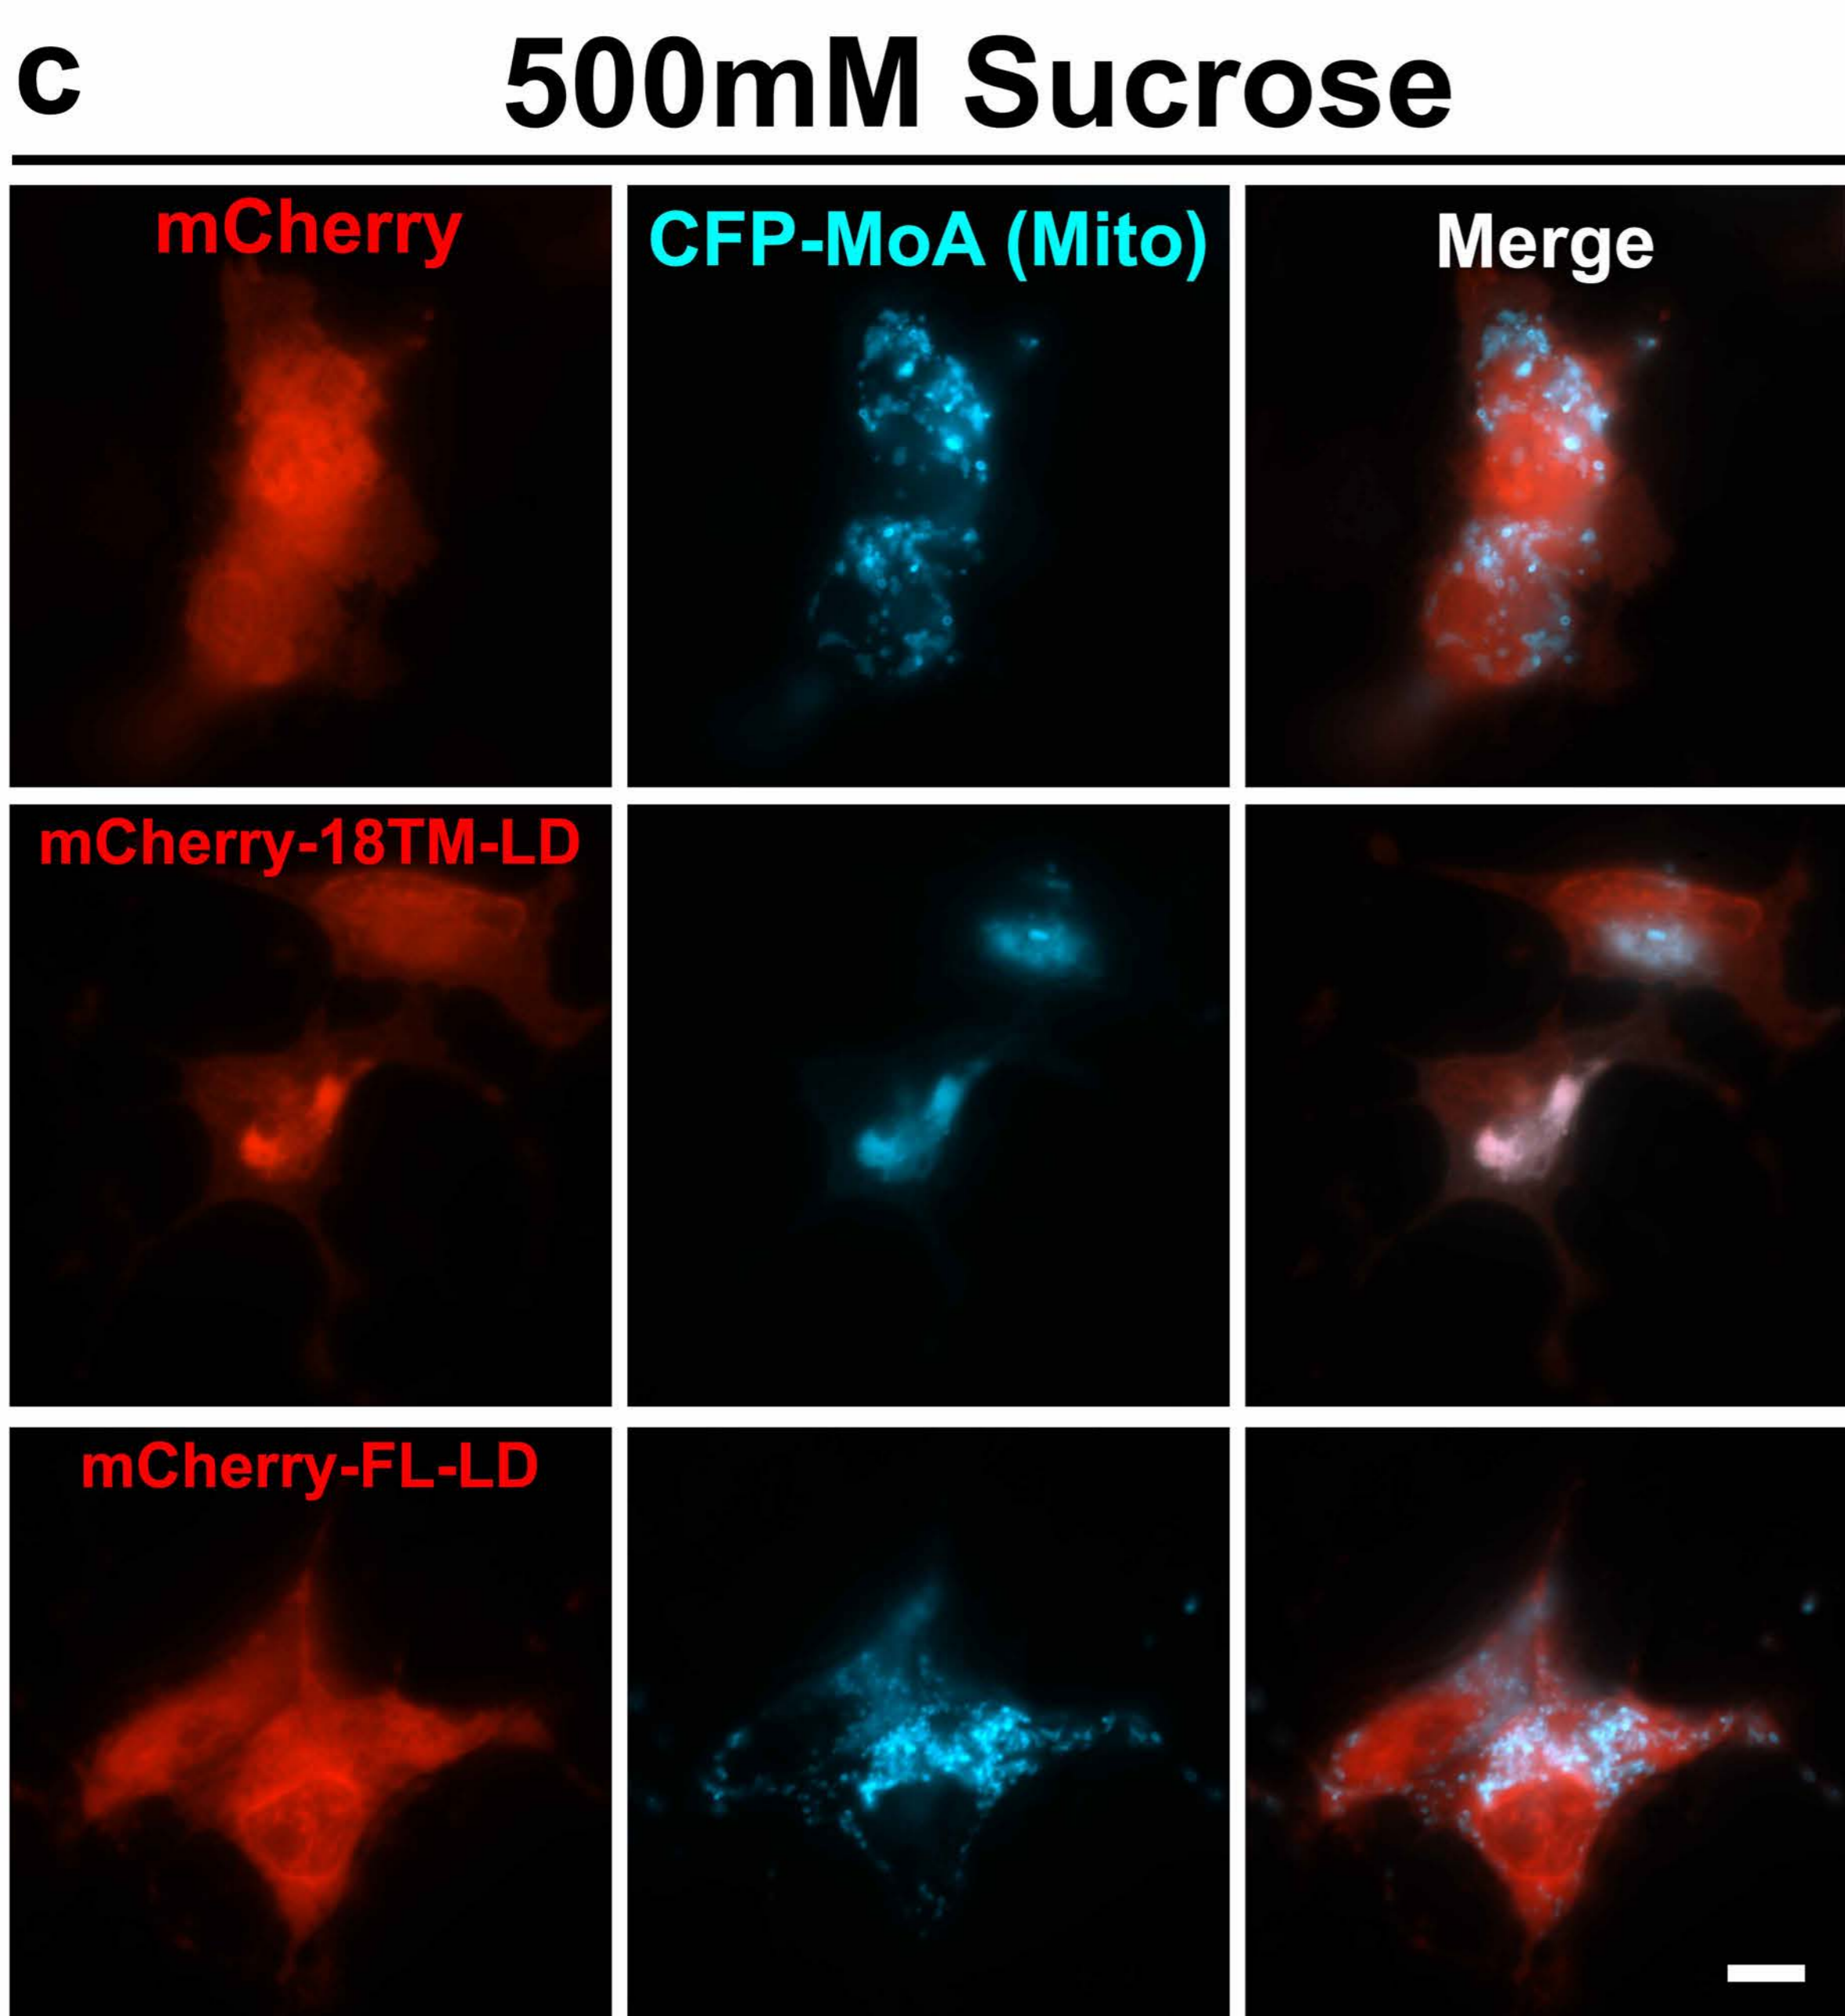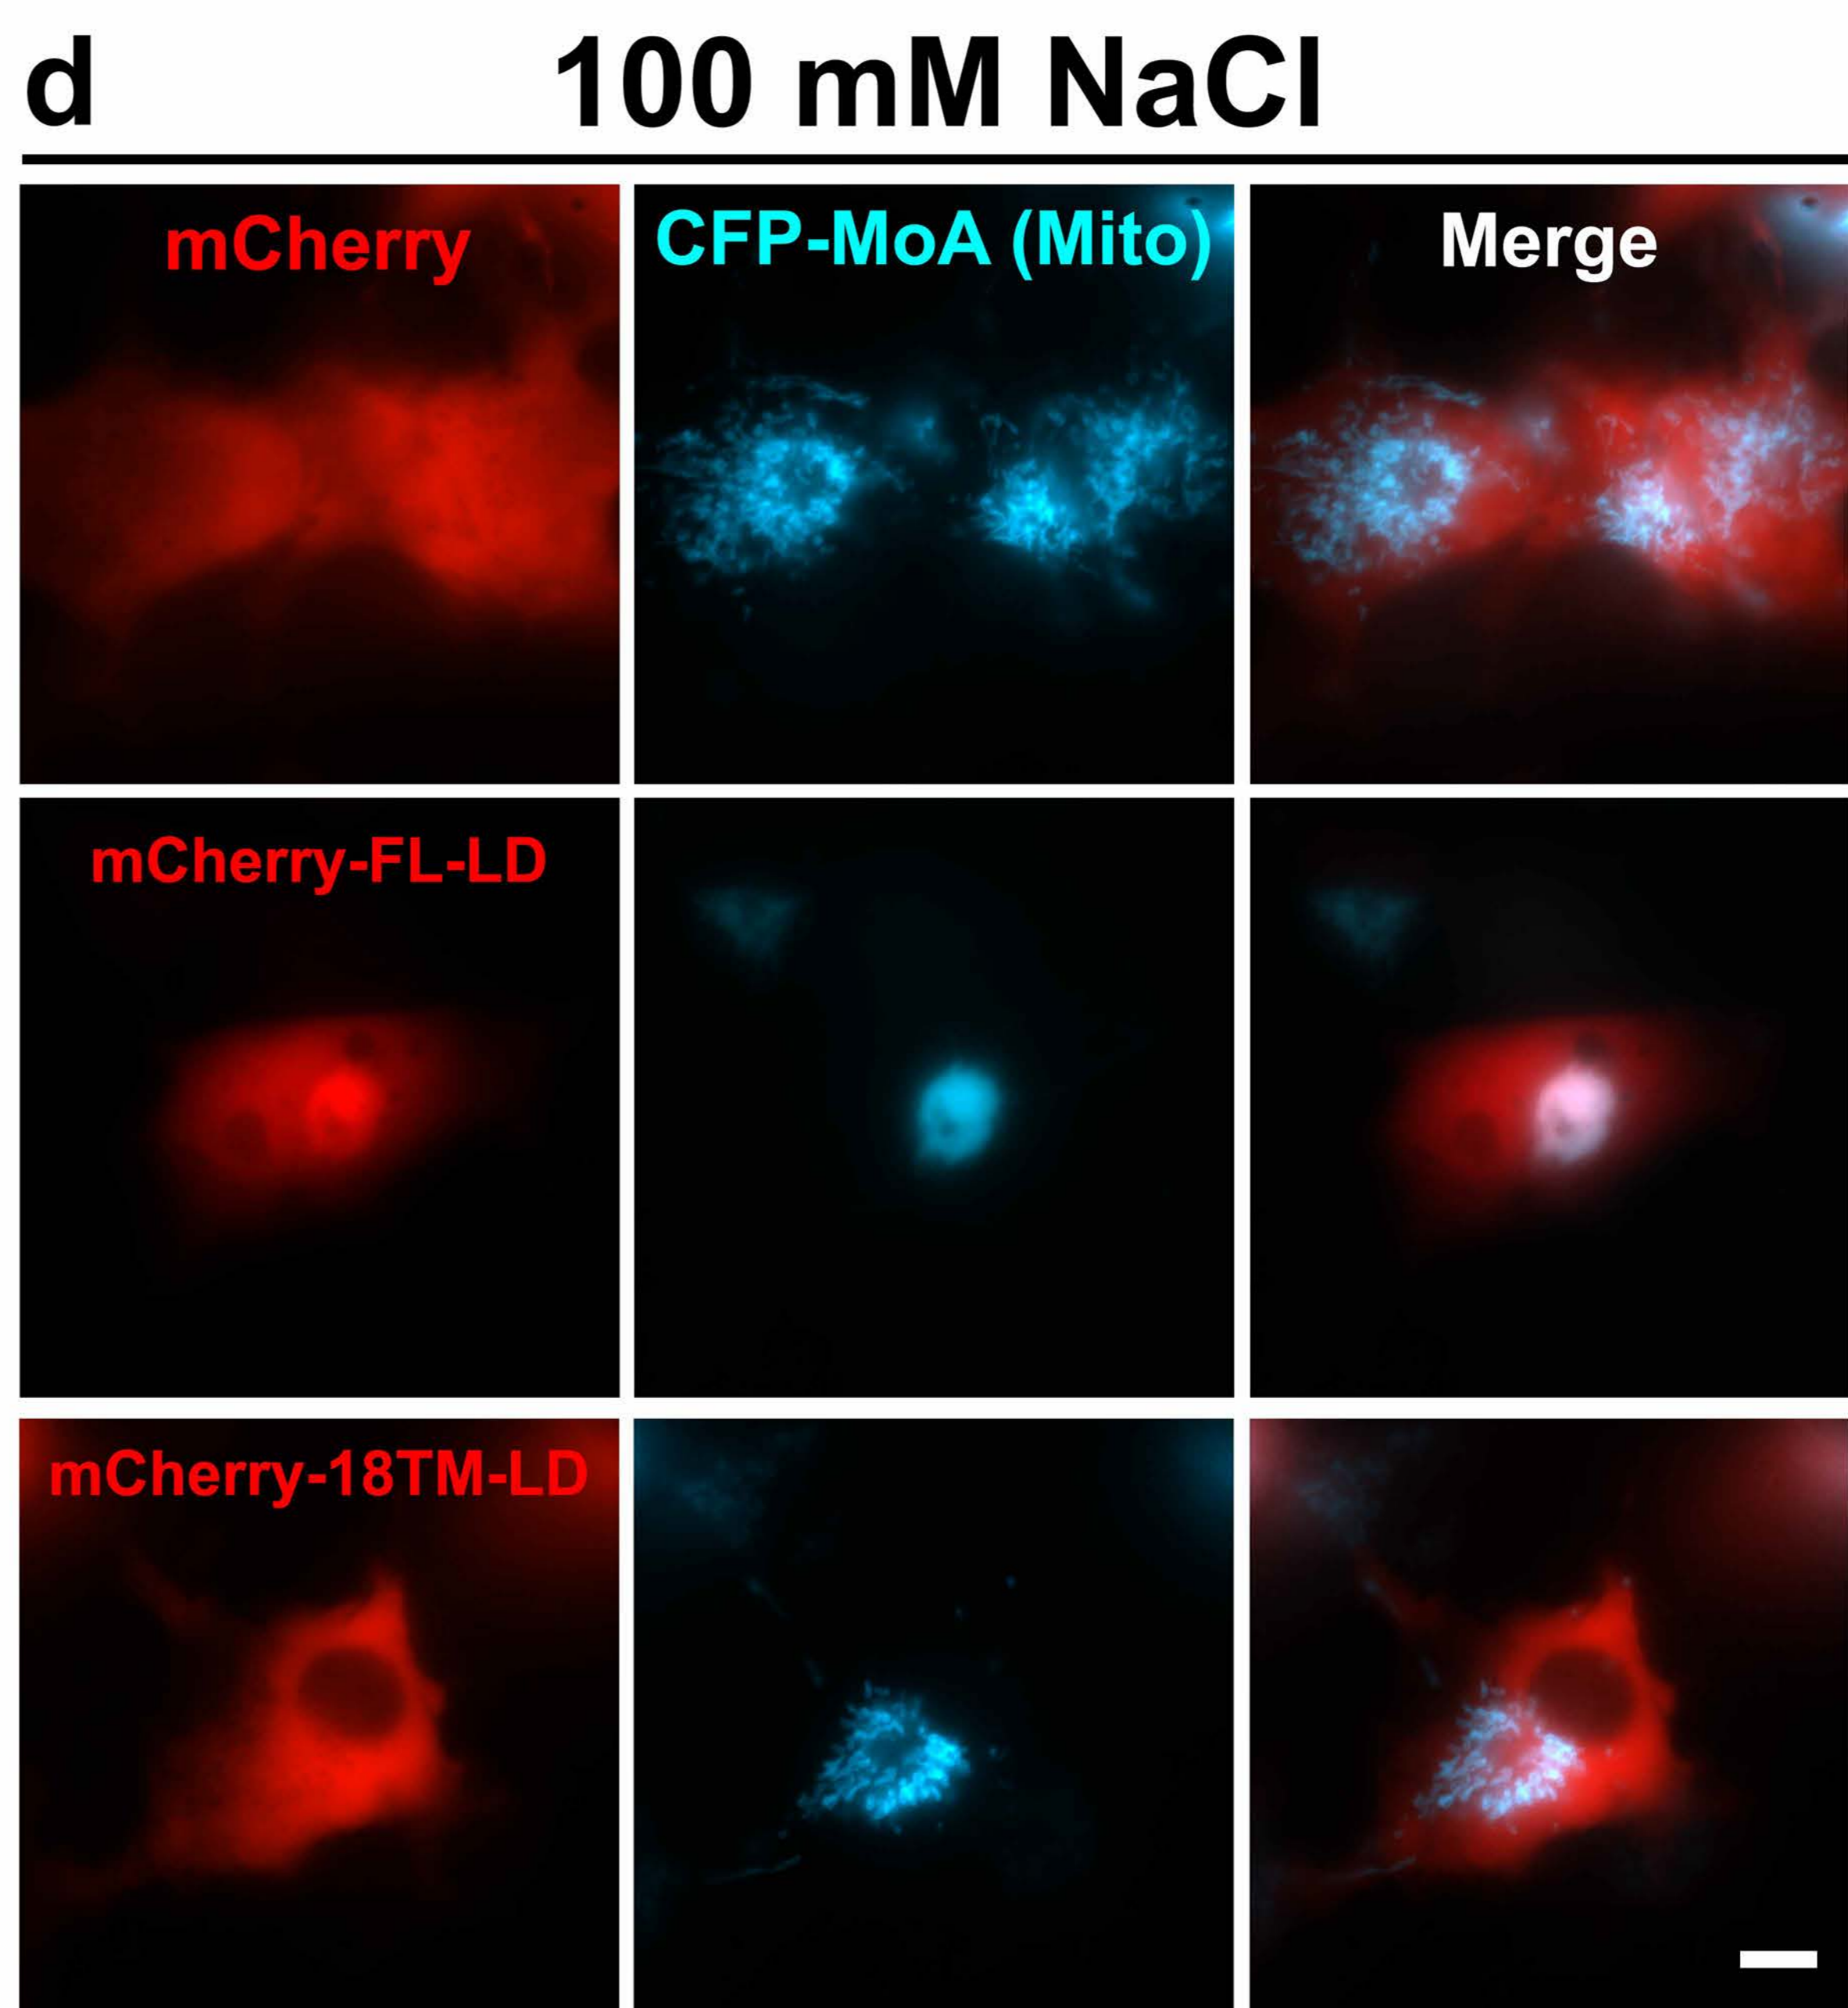



# Supplementary Figure 9

a

WT MEFs

mCherry-FKBP-18TM

CFP-FRB-MoA

Enlarged image

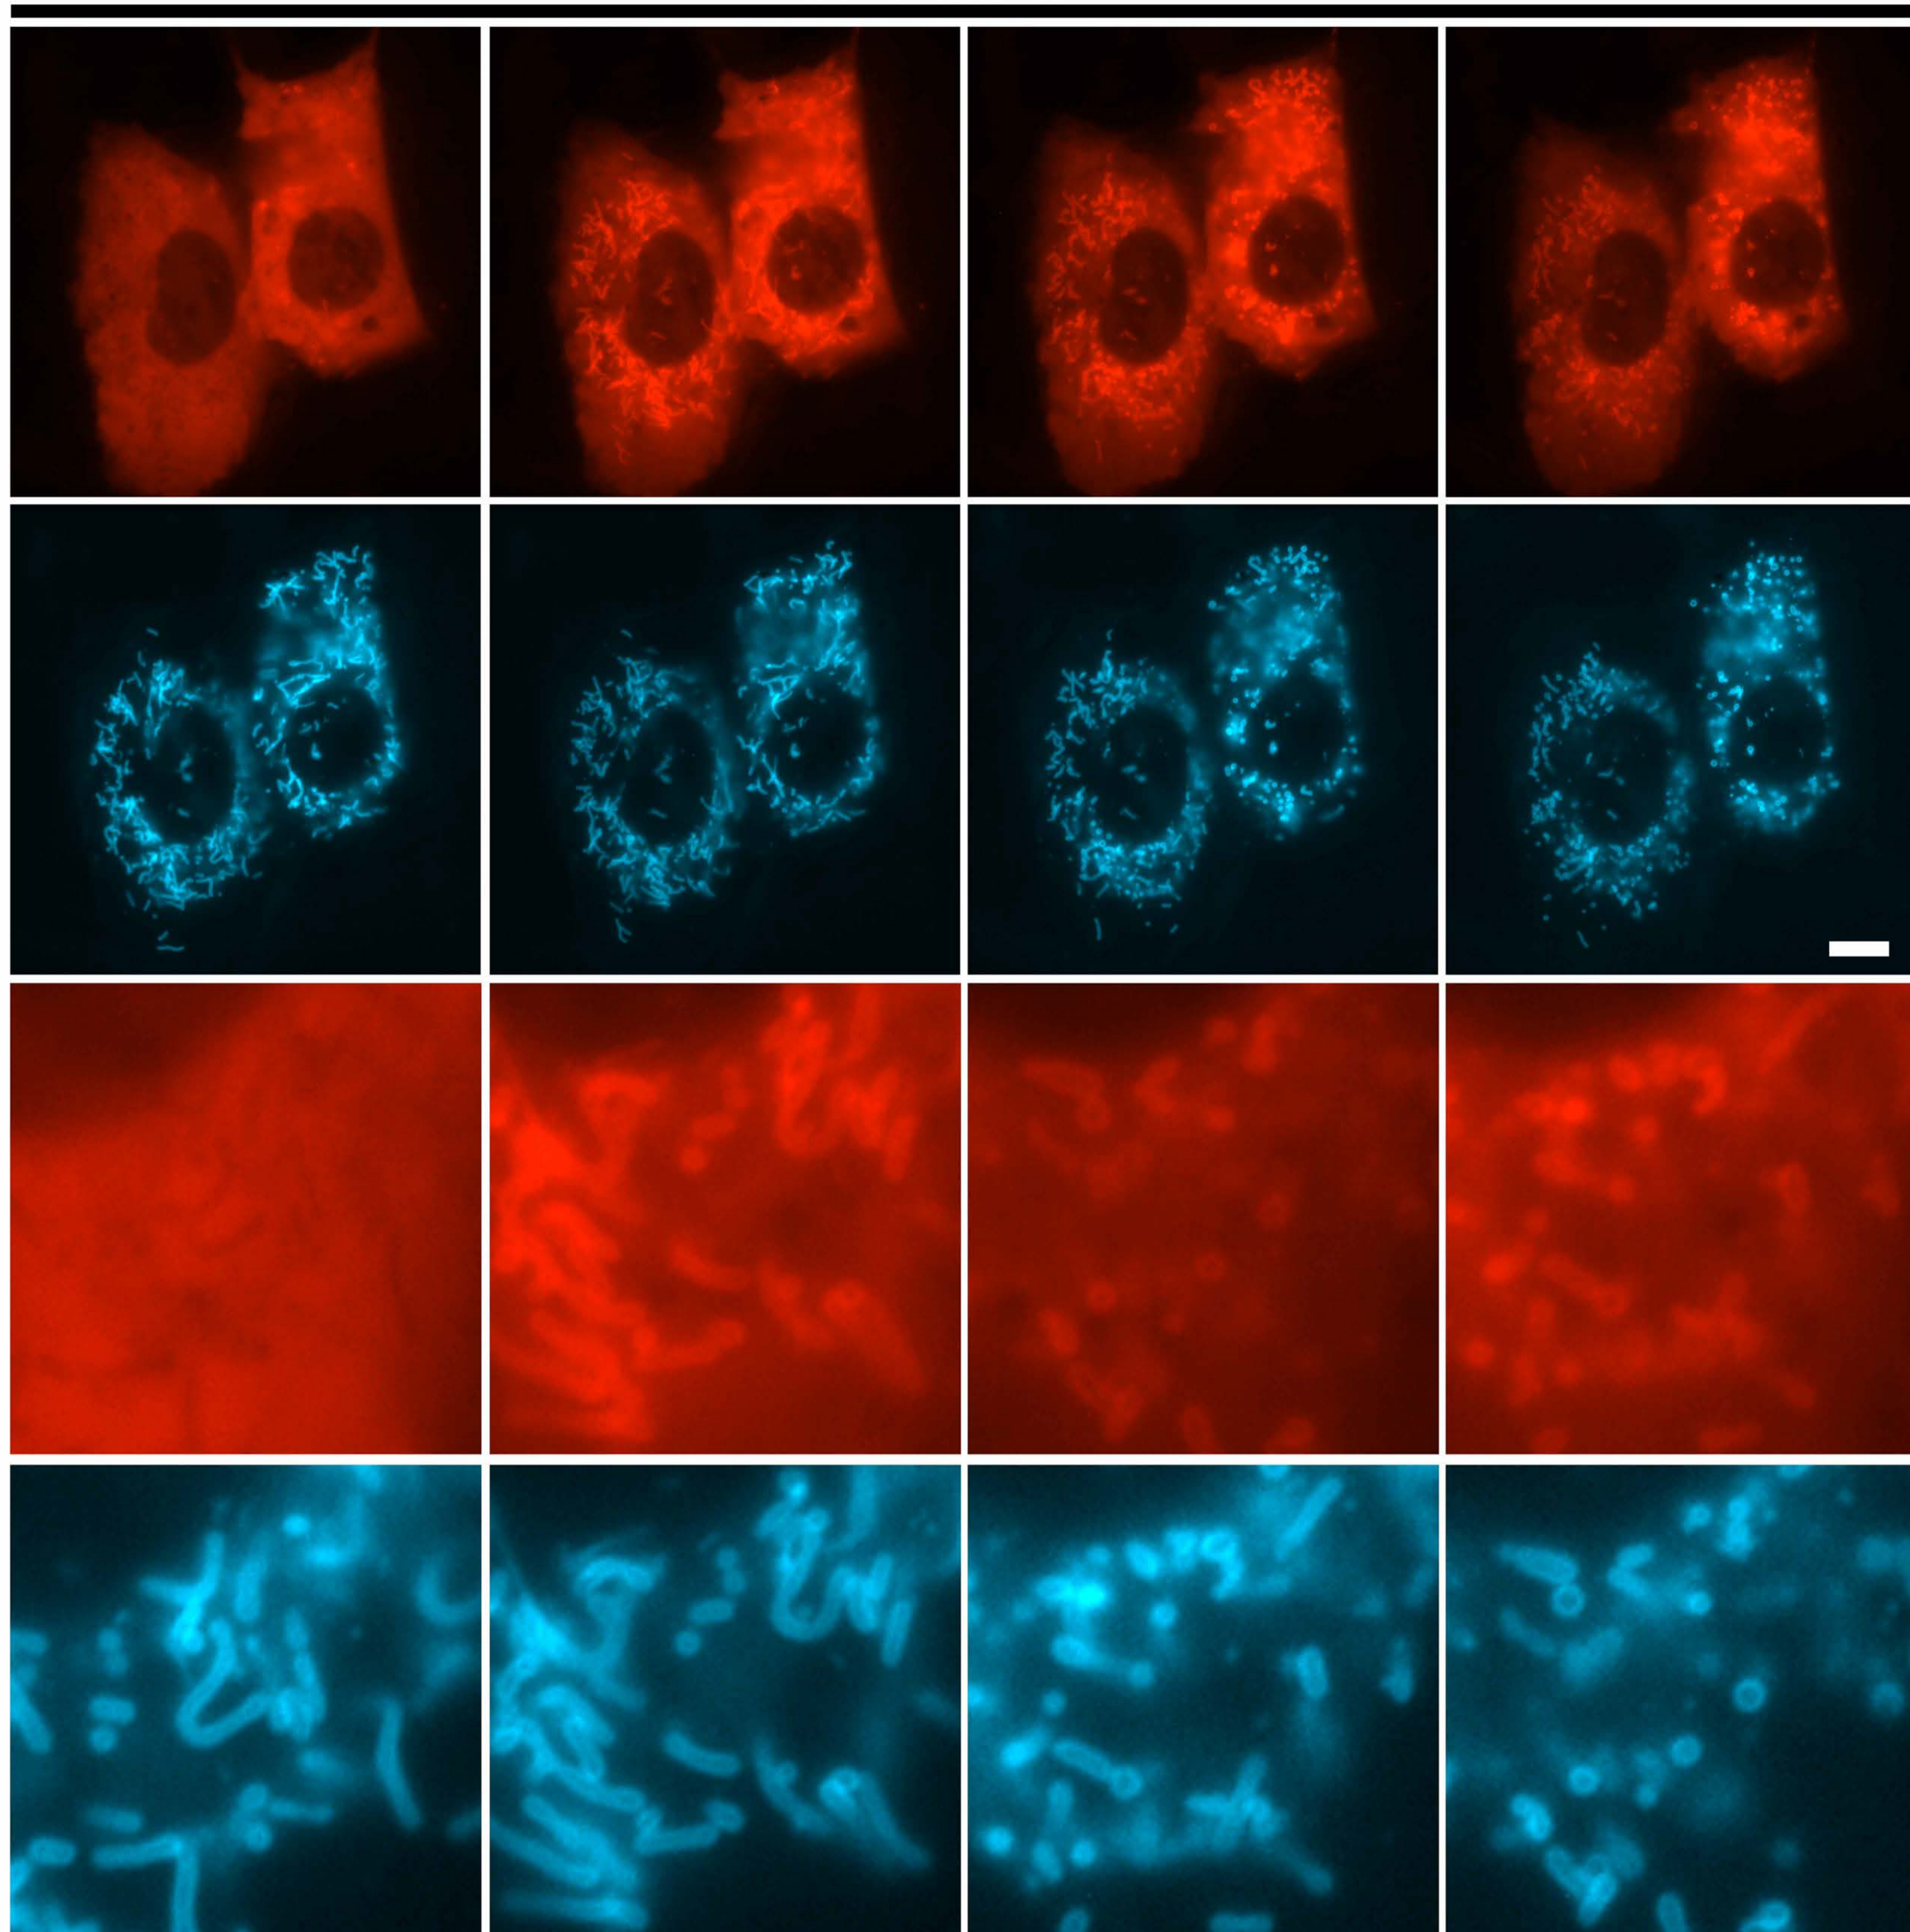

b

*Drp1* KO MEF

mCherry-FKBP-18TM

CFP-FRB-MoA

Enlarged image

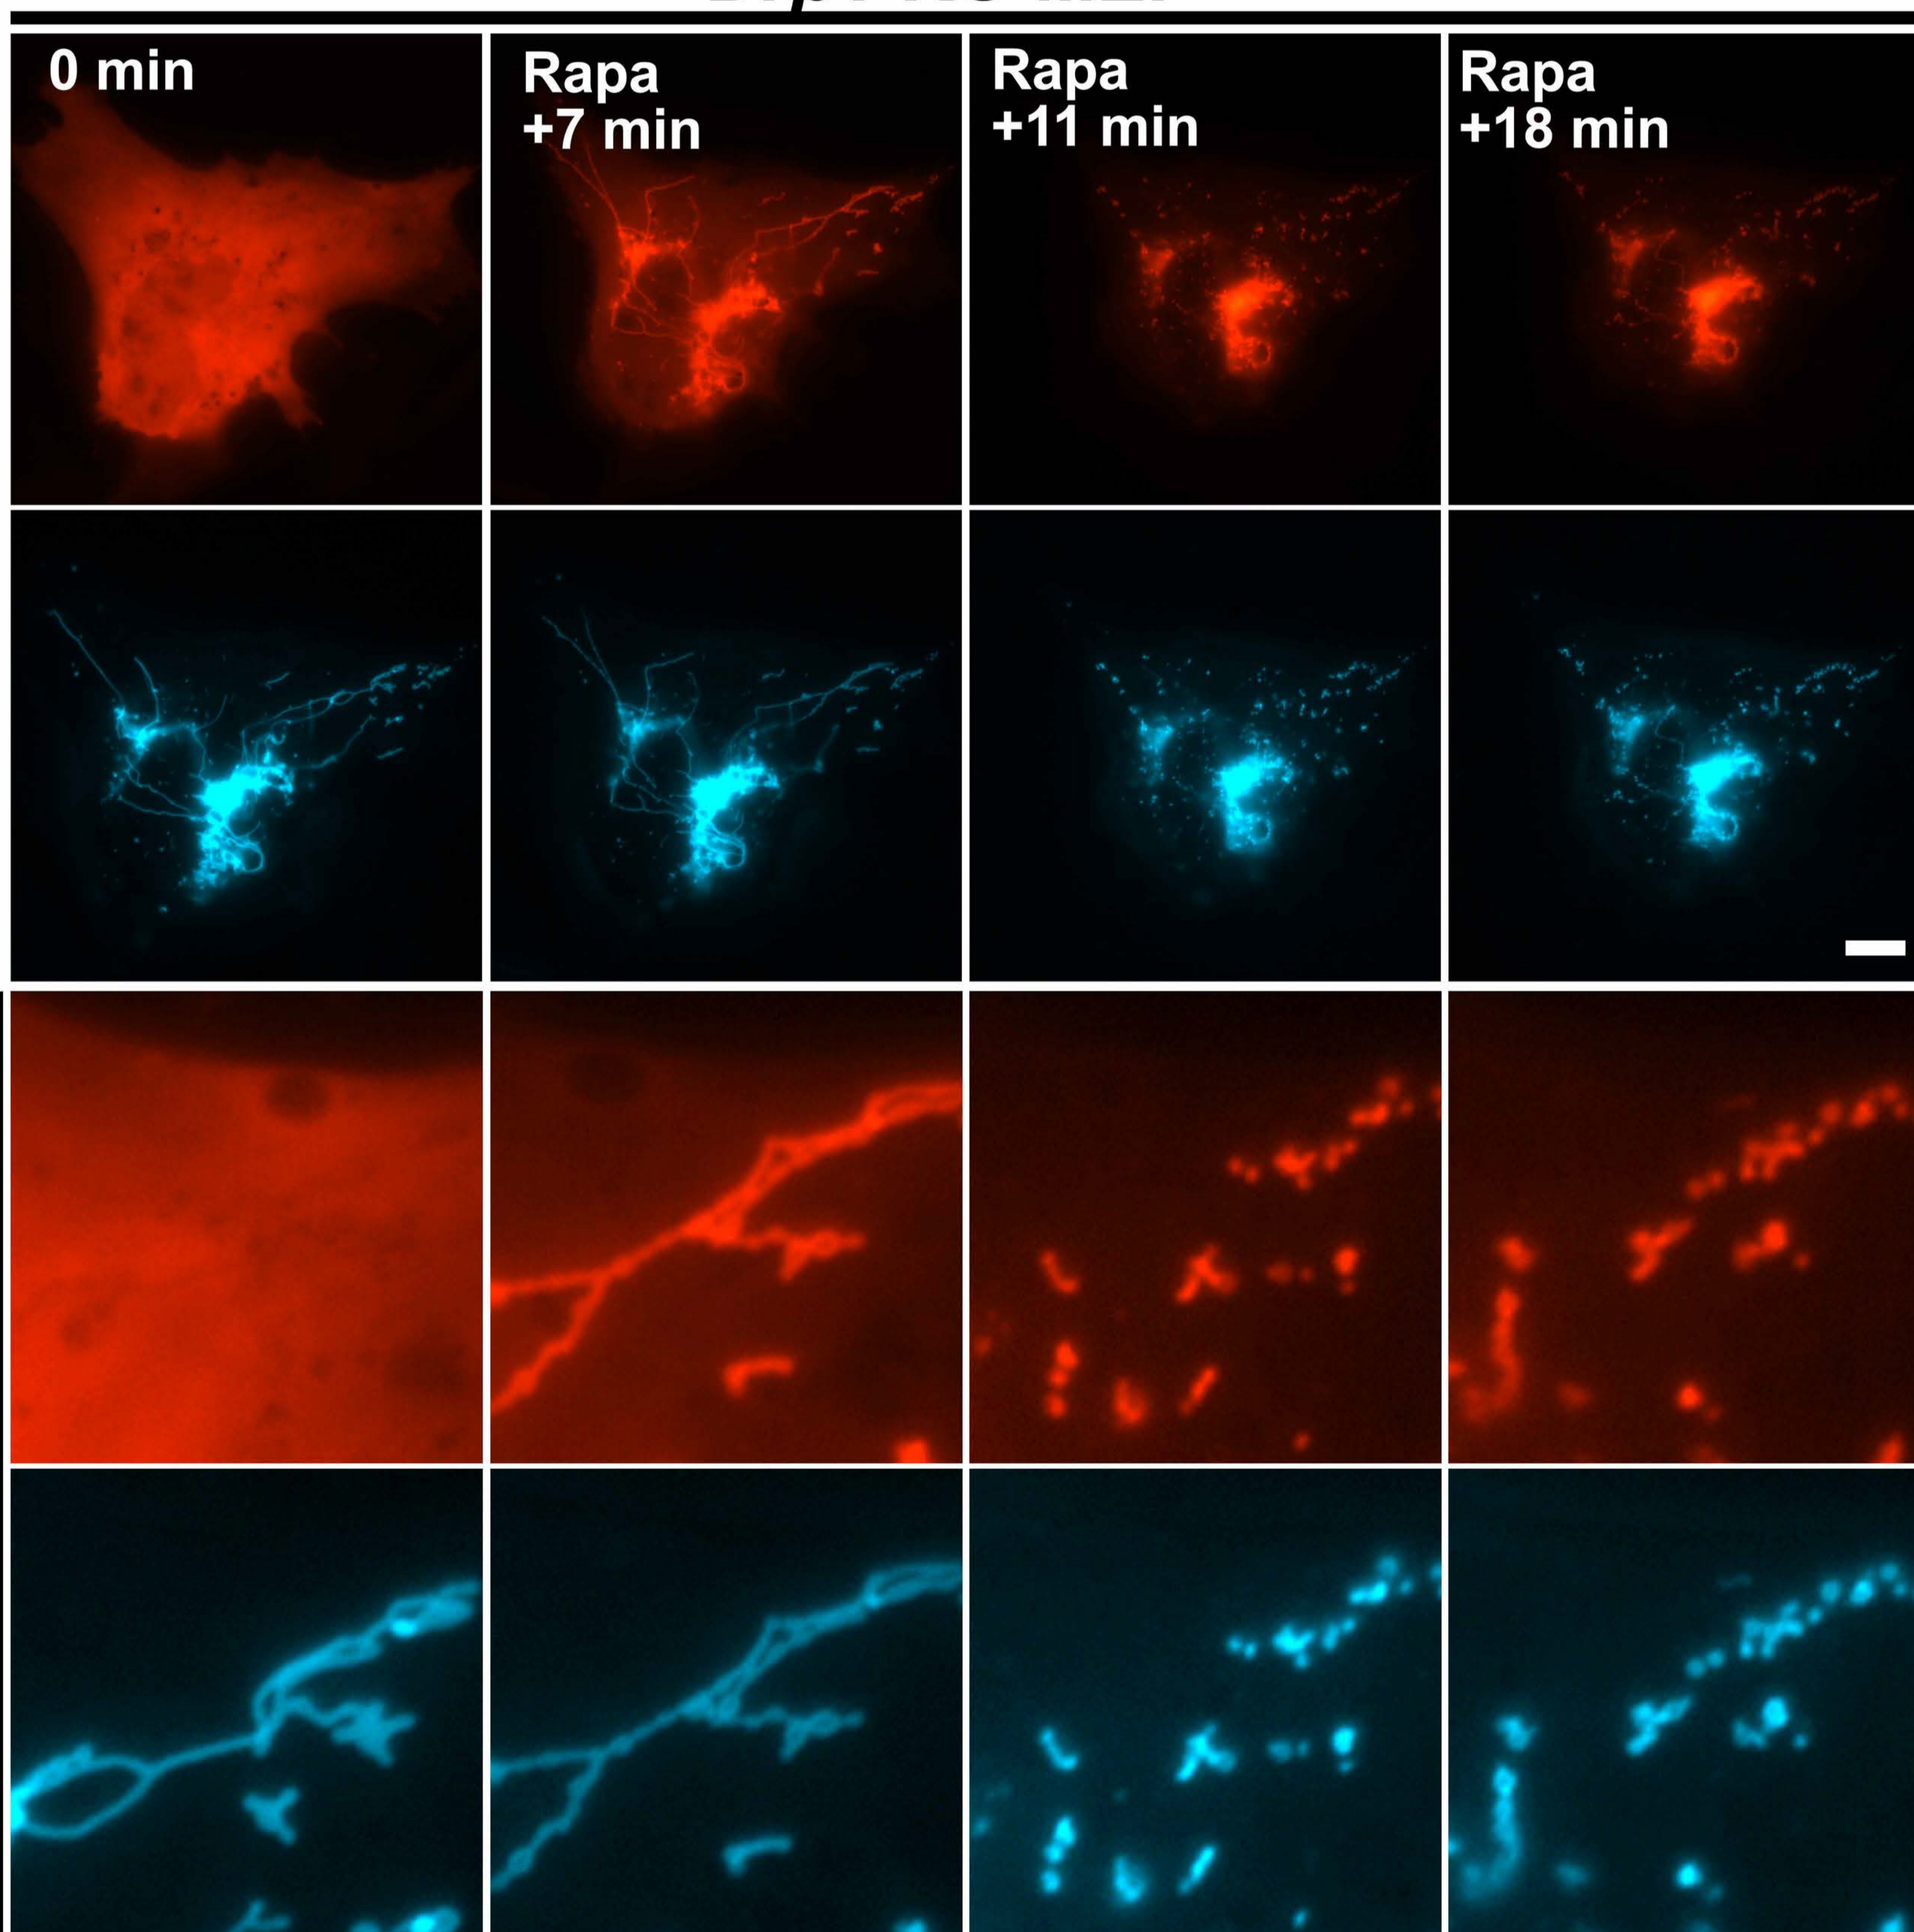

# Supplementary Figure 10

## a AAV-CMV-YFP-FKBP-18TM

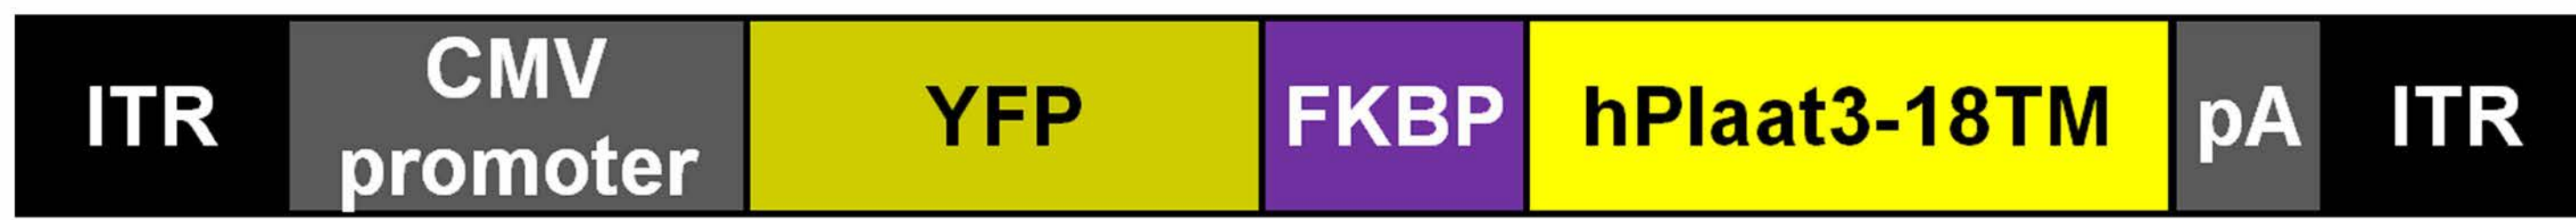

## AAV-CMV-YFP-FKBP

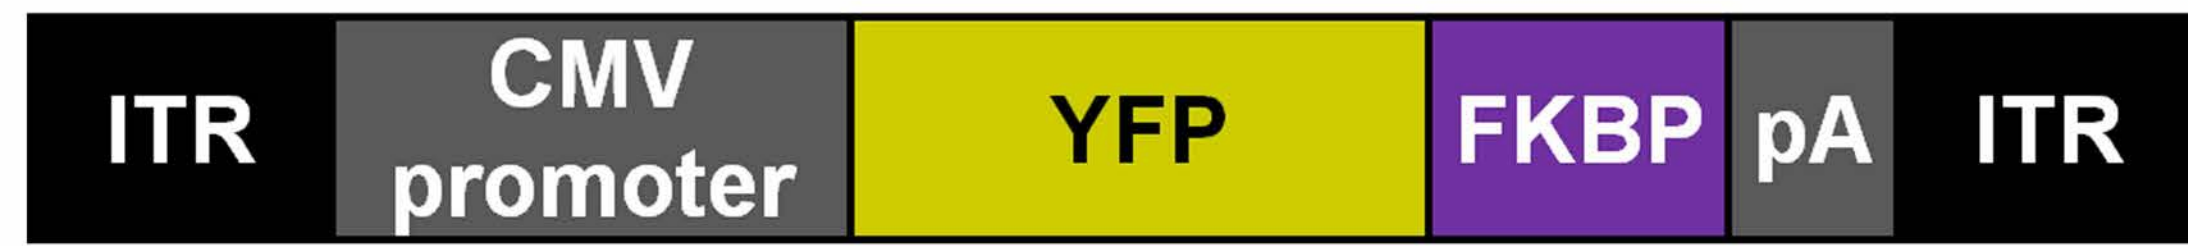

## AAV-CMV-Tom20-CFP-FRB

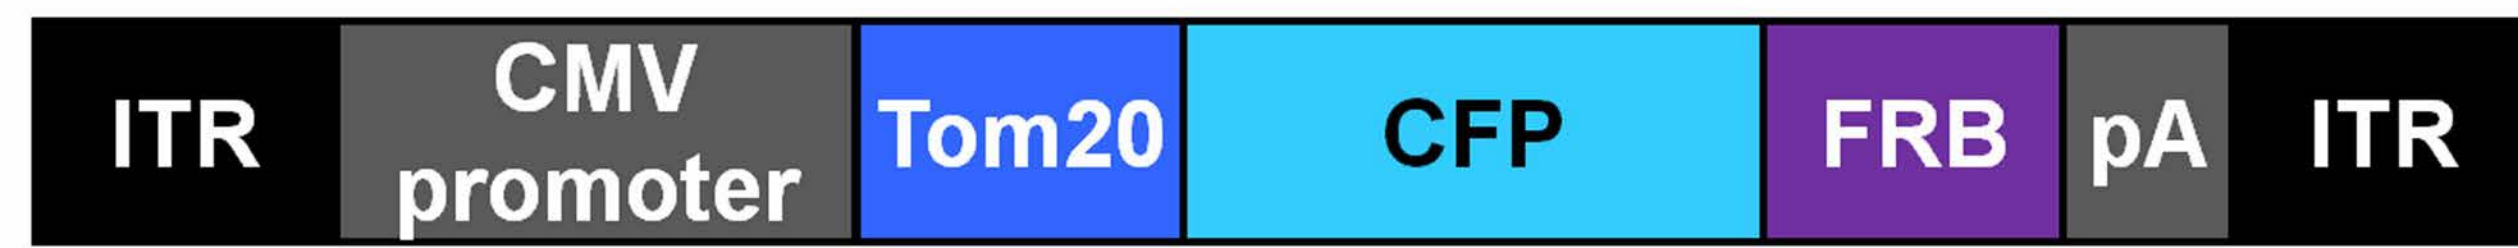

## b

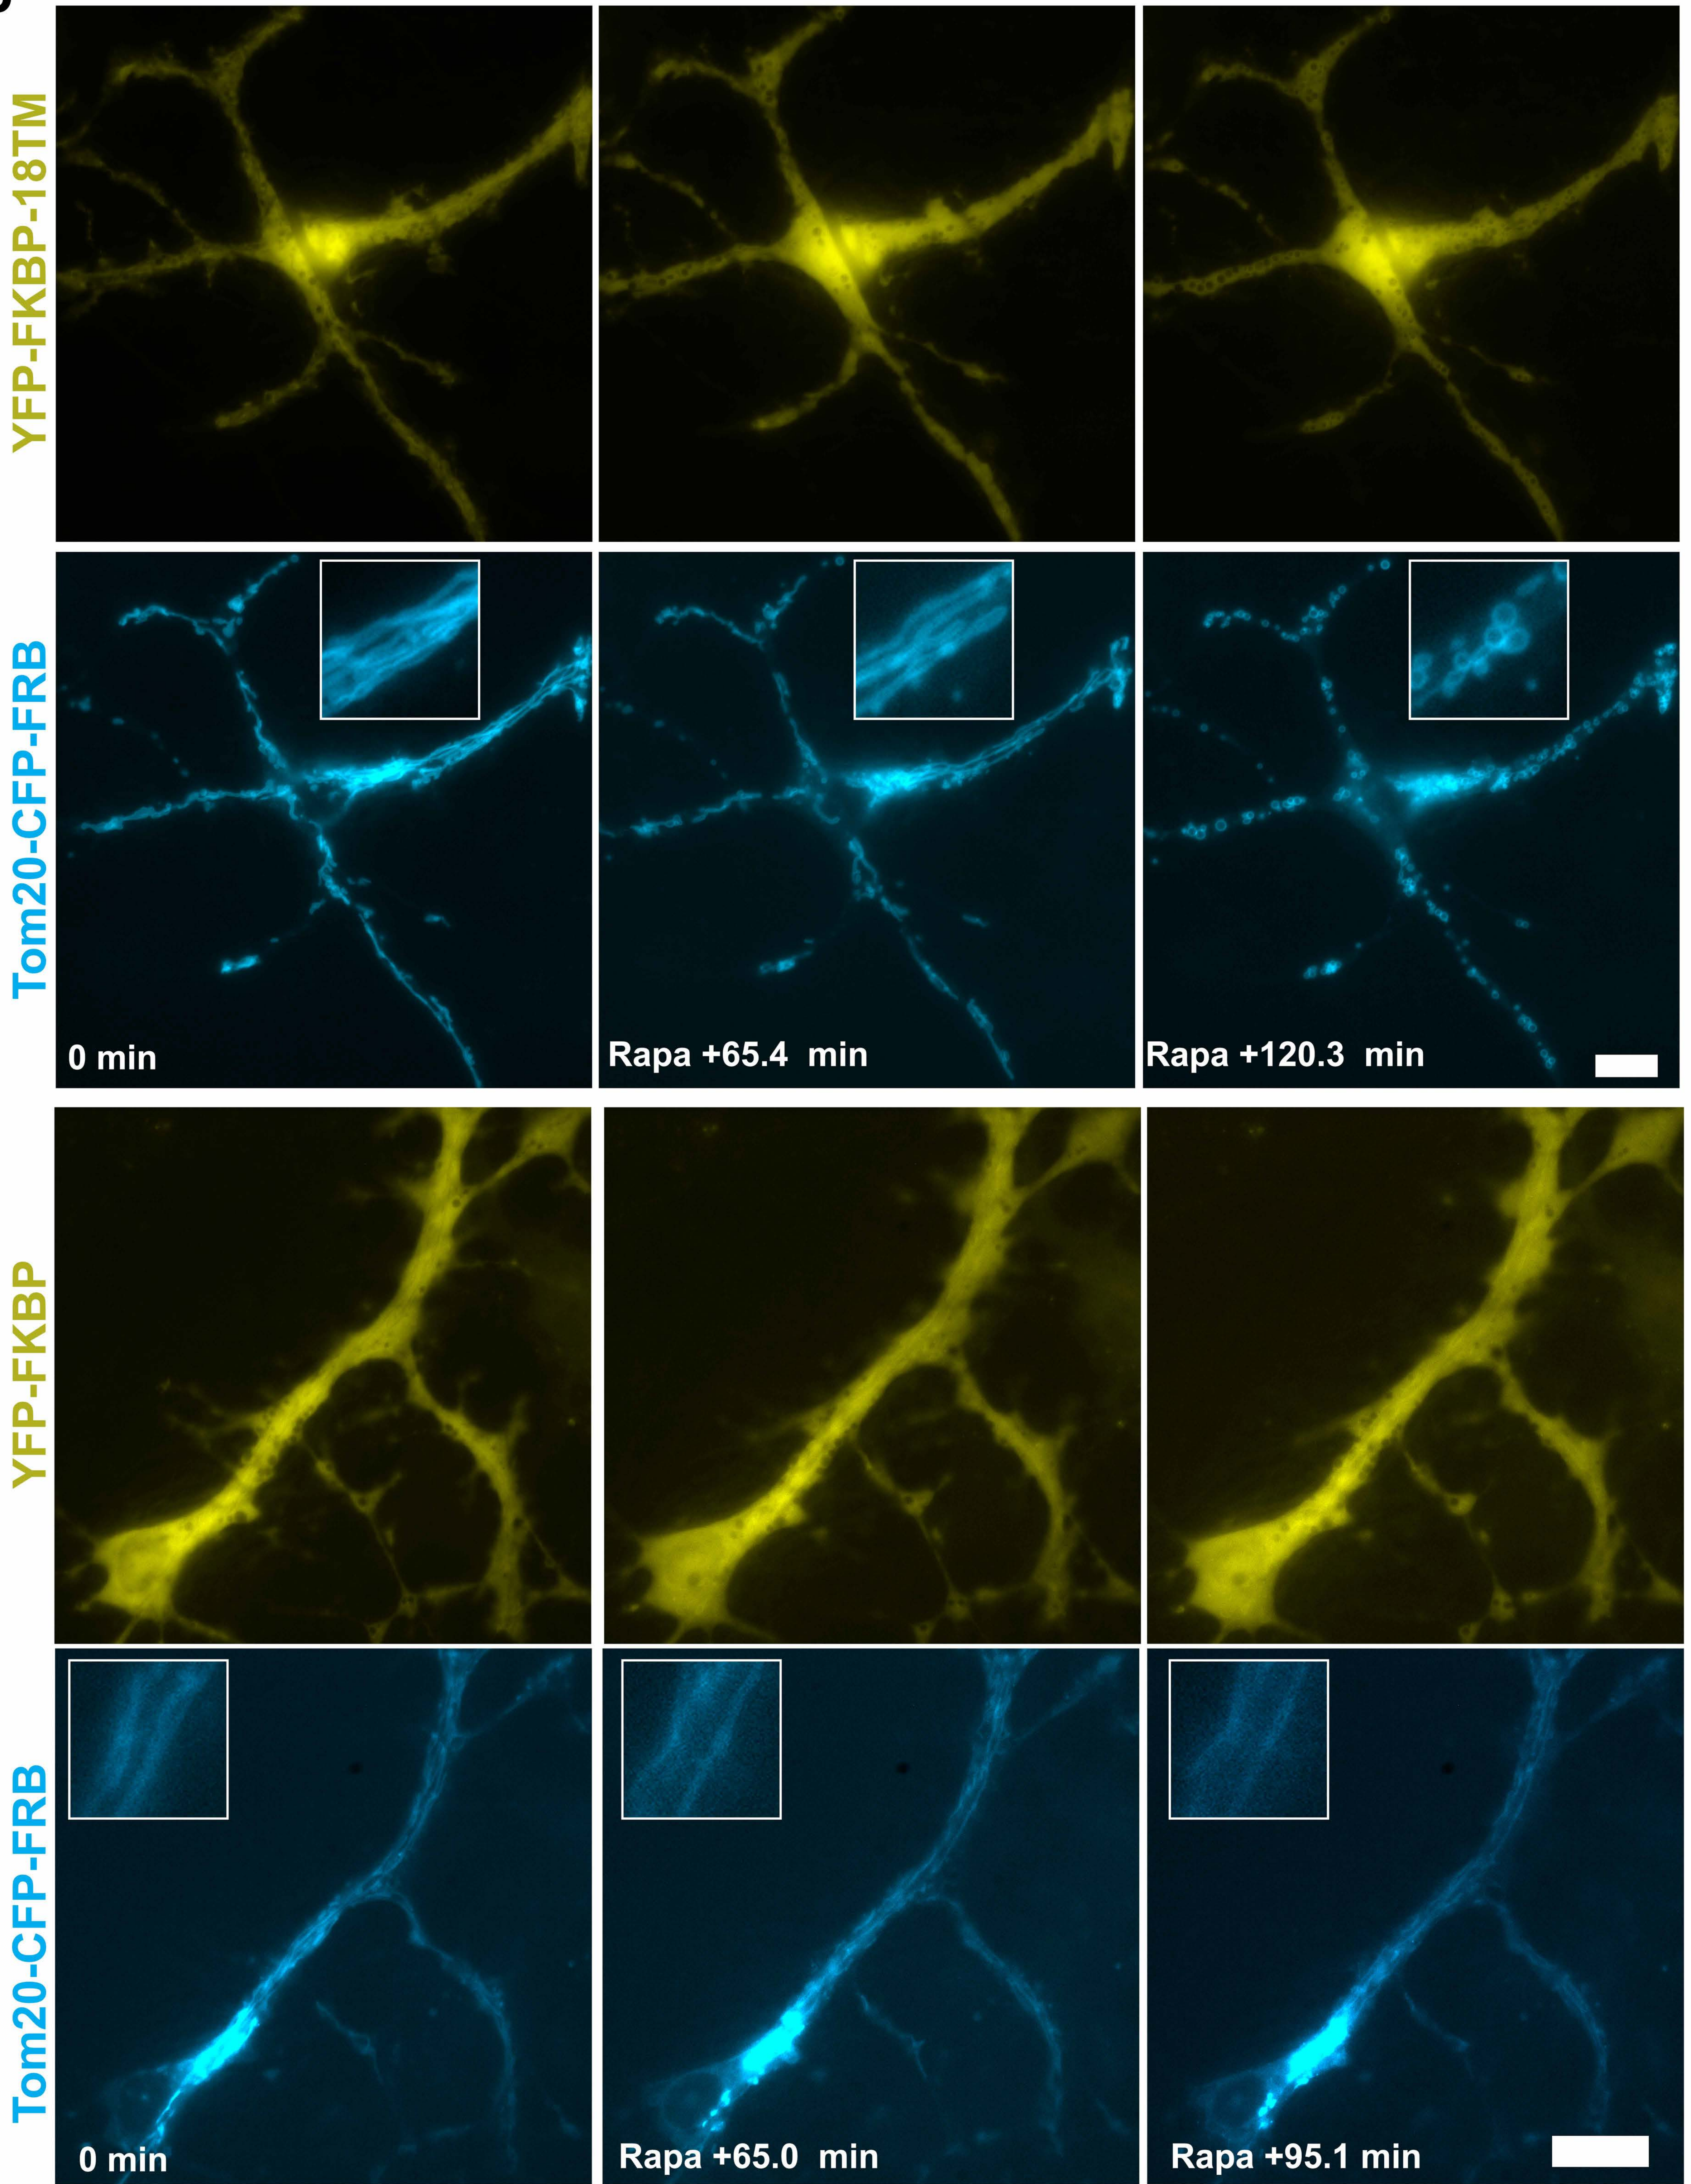

Supplement: Supplementary file [file media-1.pdf]
